# Supplementary material for: Aberrant PRDM9 expression impacts the pan-cancer genomic landscape
Source: PubMed Central journal article supplement — Genome Res. 2018 Nov;28(11):1611–20. doi: 10.1101/gr.231696.117 (PMC6211651; doi:10.1101/gr.231696.117), 2018-11
Supplement: supp_gr.231696.117_Supplemental_Fig_S1.pdf [file supp_gr.231696.117_Supplemental_Fig_S1.pdf]

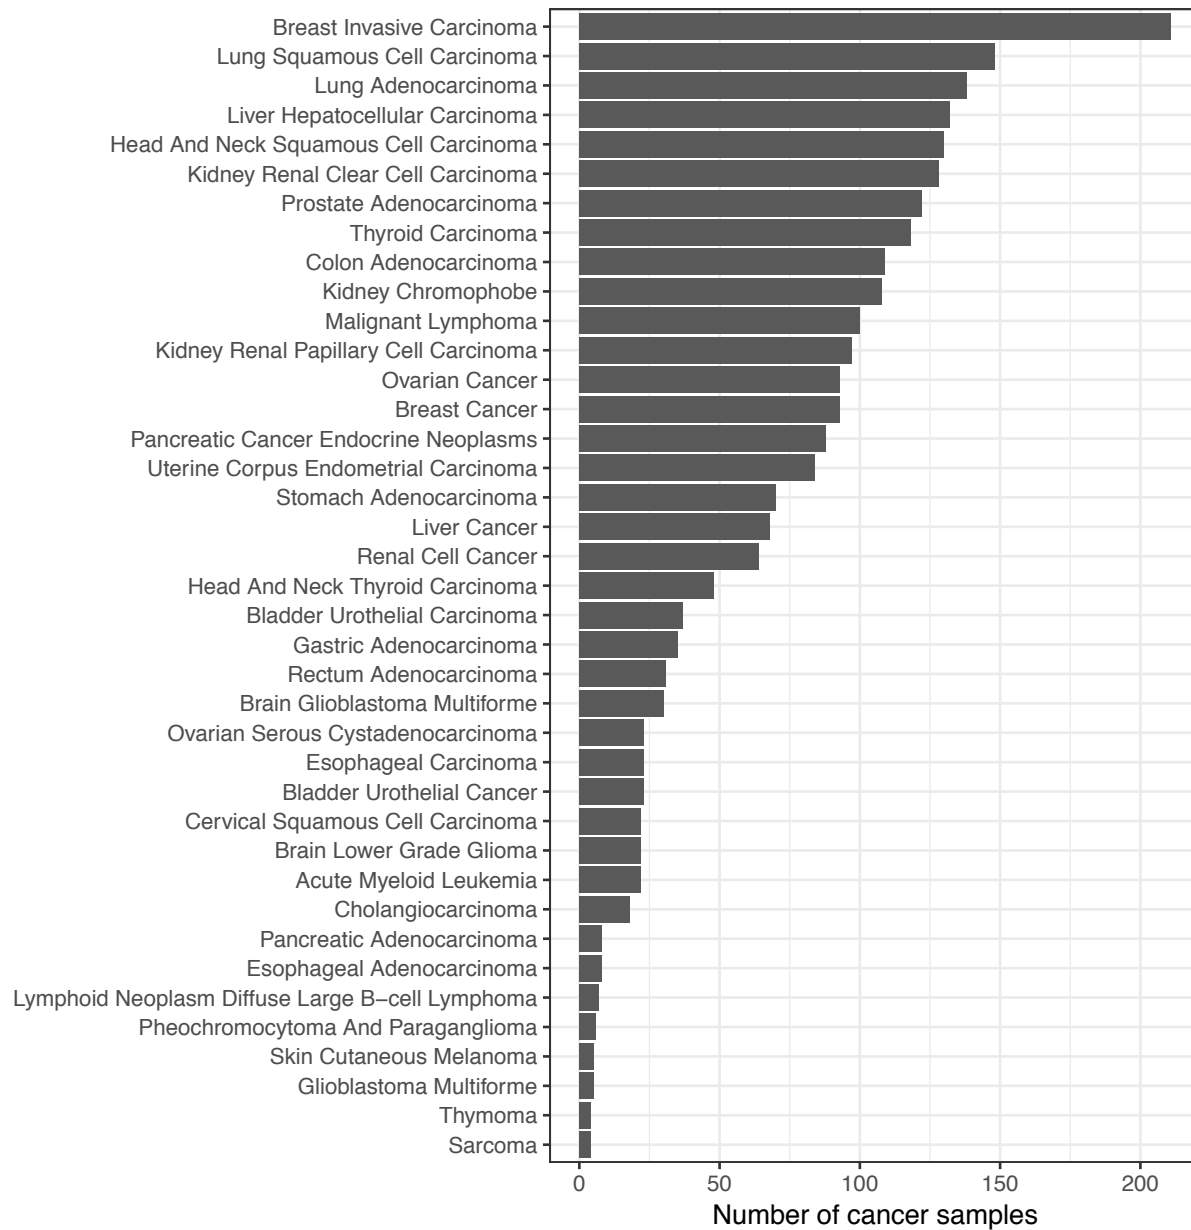

**Supplementary Figure 1.** Distribution of sequenced transcriptome samples across cancer types from the PCAWG and TCGA projects.
