# Supplementary material for: Aberrant PRDM9 expression impacts the pan-cancer genomic landscape
Source: PubMed Central journal article supplement — Genome Res. 2018 Nov;28(11):1611–20. doi: 10.1101/gr.231696.117 (PMC6211651; doi:10.1101/gr.231696.117), 2018-11
Supplement: supp_gr.231696.117_Supplemental_Fig_S2.pdf [file supp_gr.231696.117_Supplemental_Fig_S2.pdf]

(A)

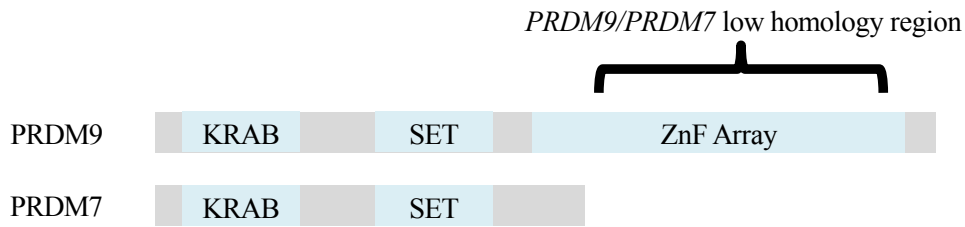

(B)

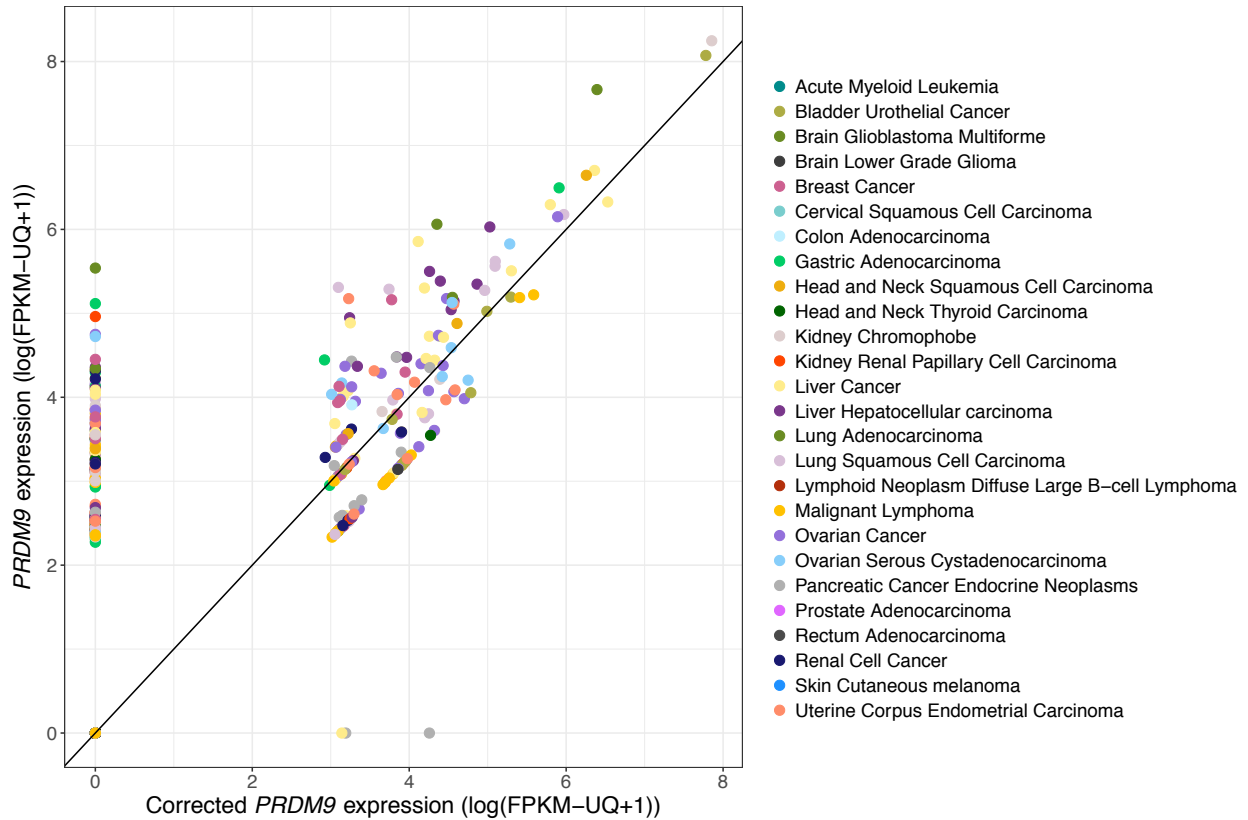

**Supplementary Figure 2.** *PRDM9/PRDM7* low homology correction. (A) *PRDM9* and *PRDM7* protein structure. Low homology region between the two genes are highlighted. (B) Corrected vs uncorrected *PRDM9* expression in log(FPKM-UQ+1) across cancer types in the PCAWG project. The data points alongside the y axis show samples with no reads mapping to the *PRDM9/PRDM7* low homology region.
