# Supplementary material for: Aberrant PRDM9 expression impacts the pan-cancer genomic landscape
Source: PubMed Central journal article supplement — Genome Res. 2018 Nov;28(11):1611–20. doi: 10.1101/gr.231696.117 (PMC6211651; doi:10.1101/gr.231696.117), 2018-11
Supplement: supp_gr.231696.117_Supplemental_Fig_S4.pdf [file supp_gr.231696.117_Supplemental_Fig_S4.pdf]

(A)

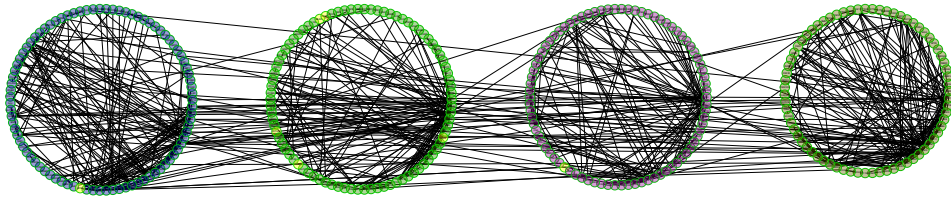

(B)

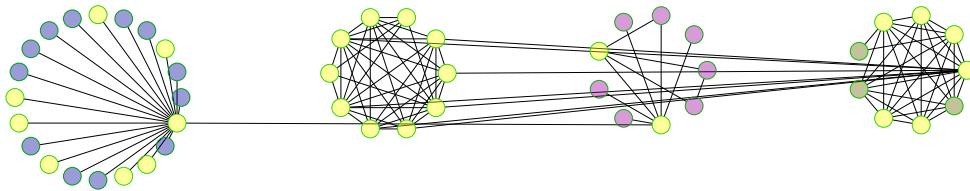

**Supplementary Figure 4.** Biological processes enriched in Reactome interaction modules(Wu et al., 2010) of (A) differentially expressed genes in cancers with *PRDM9* expression and (B) genes specifically expressed in testes, suggestive of meiotic processes. For each module, yellow nodes show genes associated with the overlapping enriched biological processes in modules formed from both sets of genes: cell differentiation, fusion of sperm to egg plasma membrane, G-protein coupled receptor signaling pathway, G-protein coupled receptor signaling pathway, membrane depolarization during action potential, multicellular organism development, nucleosome assembly, response to progesterone and sperm capacitation.
