# Supplementary material for: Aberrant PRDM9 expression impacts the pan-cancer genomic landscape
Source: PubMed Central journal article supplement — Genome Res. 2018 Nov;28(11):1611–20. doi: 10.1101/gr.231696.117 (PMC6211651; doi:10.1101/gr.231696.117), 2018-11
Supplement: supp_gr.231696.117_Supplemental_Fig_S6.pdf [file supp_gr.231696.117_Supplemental_Fig_S6.pdf]

(A)

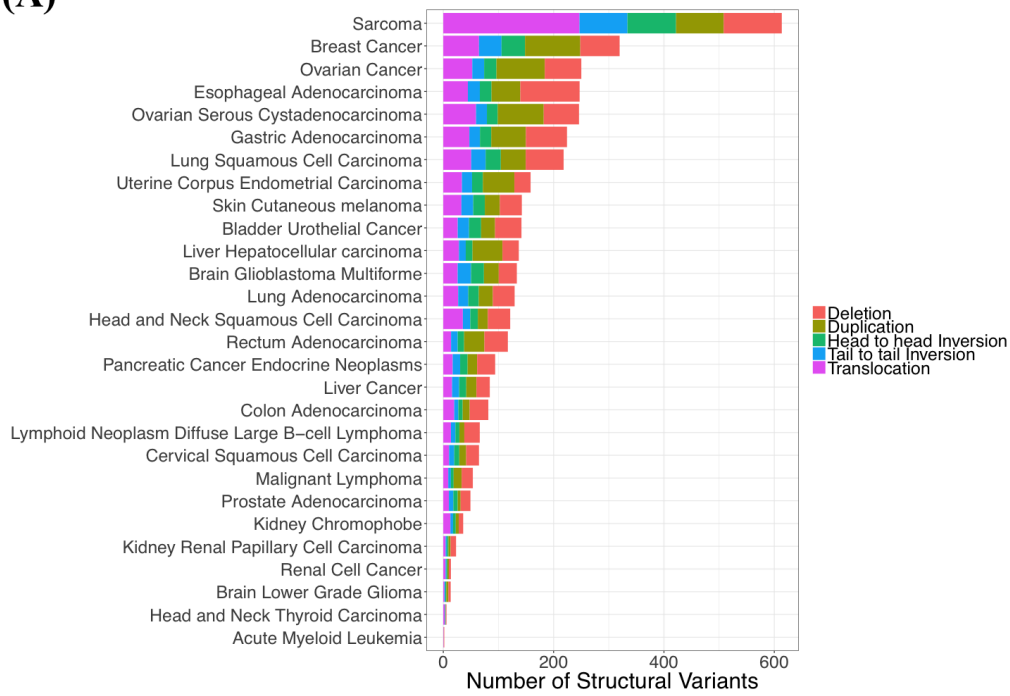

(B)

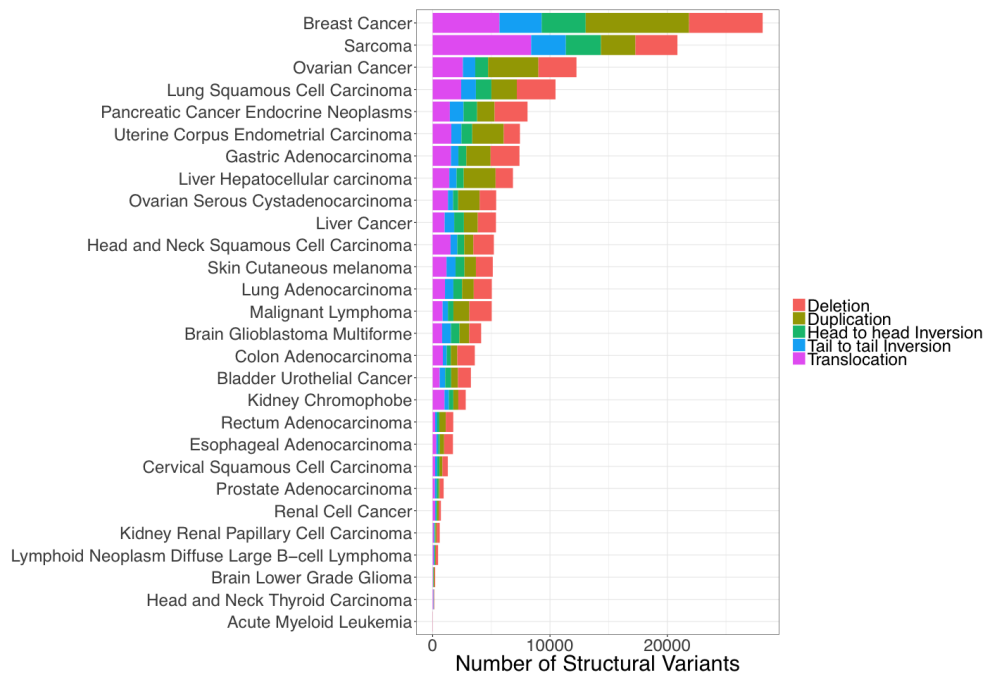

**Supplementary Figure 6.** Characterization of structural variants within the PCAWG cohort. (A) Average number of structural variants and their classification per patient, clustered for each cancer type. (B) Total number of structural variants per cancer type.
