# Supplementary material for: Aberrant PRDM9 expression impacts the pan-cancer genomic landscape
Source: PubMed Central journal article supplement — Genome Res. 2018 Nov;28(11):1611–20. doi: 10.1101/gr.231696.117 (PMC6211651; doi:10.1101/gr.231696.117), 2018-11
Supplement: supp_gr.231696.117_Supplemental_Fig_S8.pdf [file supp_gr.231696.117_Supplemental_Fig_S8.pdf]

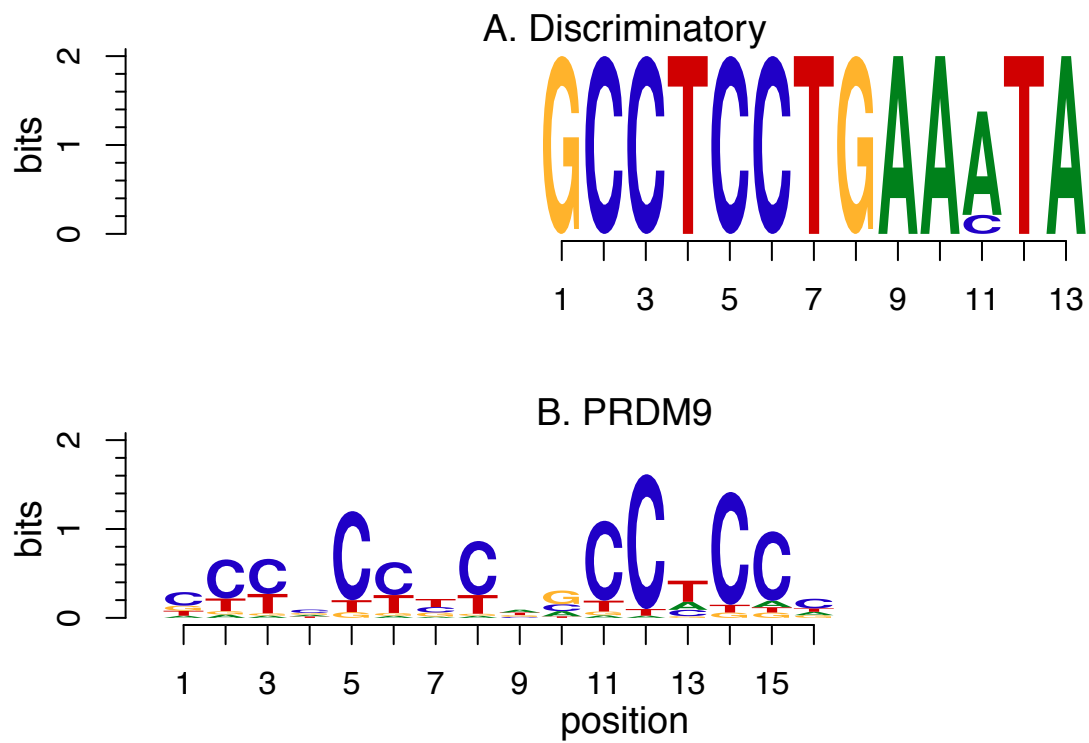

**Supplementary Figure 8.** (A) Motif whose presence near SV breakpoints significantly discriminated between samples with and without *PRDM9* expression ( $q$ -value =  $7.1 \times 10^{-7}$ ), which partially matched the motif recognized by the PRDM9 A-variant (B).
