# Supplementary material for: Aberrant PRDM9 expression impacts the pan-cancer genomic landscape
Source: PubMed Central journal article supplement — Genome Res. 2018 Nov;28(11):1611–20. doi: 10.1101/gr.231696.117 (PMC6211651; doi:10.1101/gr.231696.117), 2018-11
Supplement: supp_gr.231696.117_Supplemental_Fig_S9.pdf [file supp_gr.231696.117_Supplemental_Fig_S9.pdf]

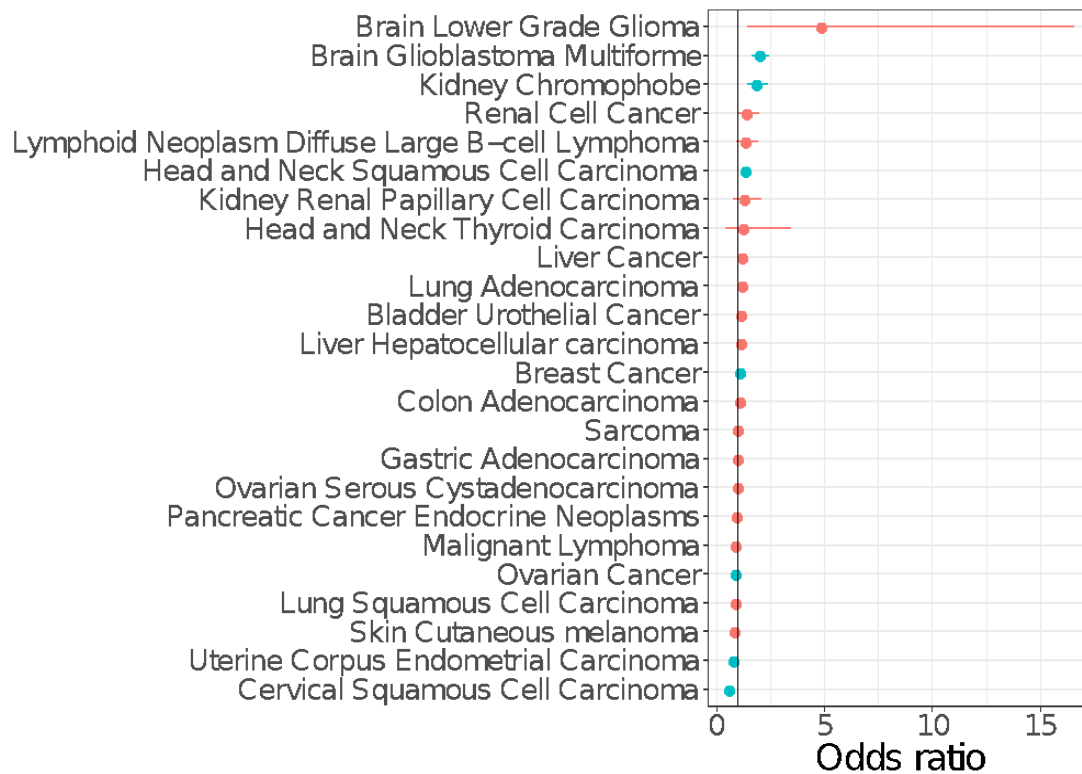

**Supplementary Figure 9.** Enrichment for SV breakpoints at sites of PRDM9-associated recombination hotspots in samples expressing *PRDM9*, as shown by odds ratios > 1 for each cancer type, and excluding SV breakpoints falling in Alu or THE1 repeat elements (blue:  $p < 0.05$  with Bonferonni correction for the number of cancer types tested; bars indicate 95% confidence intervals).
