# Supplementary material for: Aberrant PRDM9 expression impacts the pan-cancer genomic landscape
Source: PubMed Central journal article supplement — Genome Res. 2018 Nov;28(11):1611–20. doi: 10.1101/gr.231696.117 (PMC6211651; doi:10.1101/gr.231696.117), 2018-11
Supplement: supp_gr.231696.117_Supplemental_Fig_S10.pdf [file supp_gr.231696.117_Supplemental_Fig_S10.pdf]

**(A)**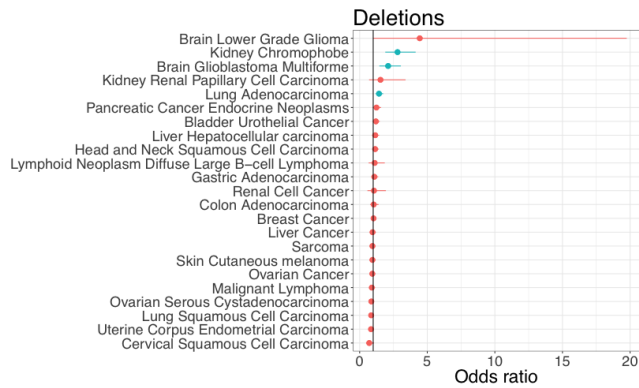**(B)**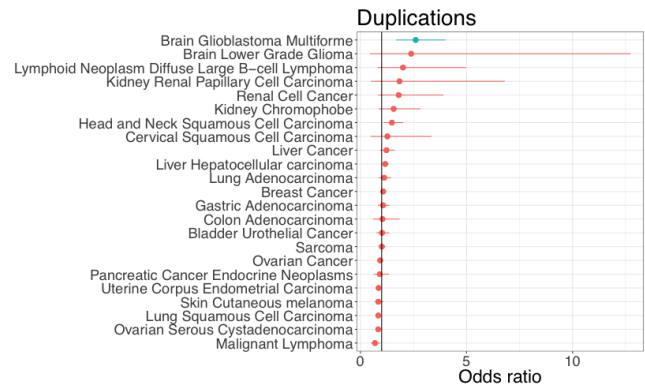**(C)**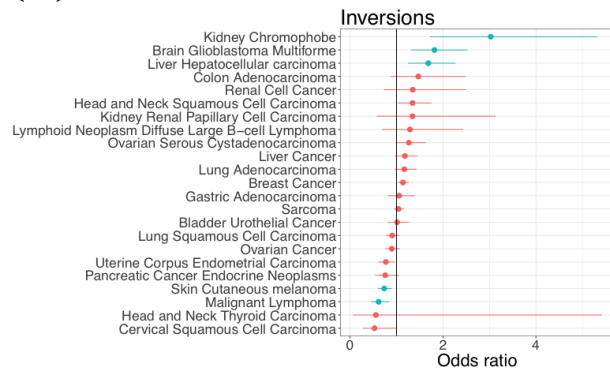**(D)**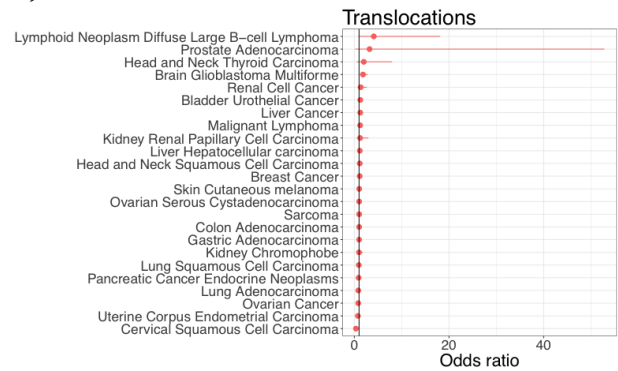

**Supplementary Figure 10.** Enrichment for each SV, namely deletions (A), duplications (B), inversions (C), and translocations (D), at sites of PRDM9-associated recombination hotspots in samples expressing *PRDM9*, as shown by odds ratios > 1 for each cancer type (blue:  $p < 0.05$  with Bonferroni correction for multiple testing for the number of cancers tested; bars indicate 95% confidence intervals).
