# Supplementary material for: Aberrant PRDM9 expression impacts the pan-cancer genomic landscape
Source: PubMed Central journal article supplement — Genome Res. 2018 Nov;28(11):1611–20. doi: 10.1101/gr.231696.117 (PMC6211651; doi:10.1101/gr.231696.117), 2018-11
Supplement: supp_gr.231696.117_Supplemental_Table_S1.pdf [file supp_gr.231696.117_Supplemental_Table_S1.pdf]

**Supplementary Table 1.** Increased expression of *PRDM9* in tumors relative to matching healthy tissues within each cancer type with more than three paired samples expressing *PRDM9* (Fisher's method with One-sided Wilcoxon signed-ranked test:  $p = 2.282373e-20$ ).

| <b>Cancer Type</b>                    | <b>One-sided Wilcoxon signed-ranked test <i>p</i>-value</b> |
|---------------------------------------|-------------------------------------------------------------|
| Bladder Urothelial Carcinoma          | 0.125                                                       |
| Head and Neck Squamous Cell Carcinoma | 0.001953125                                                 |
| Kidney Chromophobe                    | 0.015625                                                    |
| Kidney Renal Clear Cell Carcinoma     | 0.0625                                                      |
| Kidney Renal Papillary Cell Carcinoma | 0.01171875                                                  |
| Liver Cancer                          | 5.59e-09                                                    |
| Liver Hepatocellular Carcinoma        | 0.00012207                                                  |
| Lung Adenocarcinoma                   | 0.000976563                                                 |
| Lung Squamous Cell Carcinoma          | 1.53e-05                                                    |
| Prostate Adenocarcinoma               | 0.0625                                                      |
| Stomach Adenocarcinoma                | 0.015625                                                    |
| Uterine Corpus Endometrial Carcinoma  | 0.0625                                                      |
