# Supplementary material for: Aberrant PRDM9 expression impacts the pan-cancer genomic landscape
Source: HighWire-hosted journal article supplement (doi:10.1101/gr.231696.117), 2018-10-19
Supplement: Supplemental_Data_1.xlsx [file Supplemental_Data_1.xlsx]

## Sheet: Data 1.1
Gene name	Ensembl ID	log2FoldChange	Adjusted pval	Drivers	Meiosis GO biological process	Differentially expressed in PRDM9 transfected cells
TNMD	ENSG00000000005	4.6807	9.07705e-14	FALSE	FALSE	FALSE
CFTR	ENSG00000001626	5.3265	1.12288e-17	FALSE	FALSE	FALSE
AOC1	ENSG00000002726	5.37029	3.54674e-21	FALSE	FALSE	FALSE
TMEM176A	ENSG00000002933	2.75531	6.16553e-11	FALSE	FALSE	FALSE
SLC22A16	ENSG00000004809	7.84365	2.26812e-45	FALSE	FALSE	FALSE
ZMYND10	ENSG00000004838	4.82521	3.03117e-40	FALSE	FALSE	FALSE
ARX	ENSG00000004848	3.75466	3.52066e-07	FALSE	FALSE	FALSE
SLC4A1	ENSG00000004939	3.0138	2.39964e-05	FALSE	FALSE	FALSE
MEOX1	ENSG00000005102	2.30021	1.0411e-06	FALSE	FALSE	FALSE
ACSM3	ENSG00000005187	2.03257	9.04641e-10	FALSE	FALSE	FALSE
PON1	ENSG00000005421	3.71239	1.51148e-09	FALSE	FALSE	FALSE
CROT	ENSG00000005469	-3.00198	1.15923e-44	FALSE	FALSE	FALSE
YBX2	ENSG00000006047	2.21677	3.98166e-06	FALSE	FALSE	FALSE
ABCC8	ENSG00000006071	2.025	0.000694095	FALSE	FALSE	FALSE
CACNA1G	ENSG00000006283	2.31223	1.31084e-07	FALSE	FALSE	FALSE
DLX6	ENSG00000006377	3.36503	3.39612e-08	FALSE	FALSE	FALSE
USH1C	ENSG00000006611	4.14533	8.78834e-11	FALSE	FALSE	FALSE
UPP2	ENSG00000007001	3.55563	2.27738e-13	FALSE	FALSE	FALSE
PROM1	ENSG00000007062	5.34486	1.19631e-19	FALSE	FALSE	FALSE
DNAH9	ENSG00000007174	6.10695	3.25818e-38	FALSE	FALSE	FALSE
SLC13A2	ENSG00000007216	6.49033	6.06492e-18	FALSE	FALSE	FALSE
CAMK1G	ENSG00000008118	2.30298	4.8358e-07	FALSE	FALSE	FALSE
DLEC1	ENSG00000008226	2.9157	1.90218e-16	FALSE	FALSE	FALSE
IL32	ENSG00000008517	2.00801	1.44811e-08	FALSE	FALSE	FALSE
PAX7	ENSG00000009709	-4.65854	1.13053e-06	FALSE	FALSE	FALSE
MLXIPL	ENSG00000009950	3.43804	5.90152e-16	FALSE	FALSE	FALSE
HHATL	ENSG00000010282	3.6774	3.27665e-06	FALSE	FALSE	FALSE
SLC6A13	ENSG00000010379	4.30861	8.30663e-18	FALSE	FALSE	FALSE
SEMA3B	ENSG00000012171	2.15409	4.9614e-09	FALSE	FALSE	FALSE
LTF	ENSG00000012223	7.16431	4.15636e-30	FALSE	FALSE	FALSE
ALOX5	ENSG00000012779	-2.49421	1.36875e-12	FALSE	FALSE	FALSE
KDM5D	ENSG00000012817	-9.79818	1.58836e-32	FALSE	FALSE	FALSE
DPEP1	ENSG00000015413	2.46739	1.65591e-05	FALSE	FALSE	FALSE
NPC1L1	ENSG00000015520	4.60056	4.36092e-18	FALSE	FALSE	FALSE
STMN4	ENSG00000015592	-2.33811	3.62057e-05	FALSE	FALSE	FALSE
CLCA4	ENSG00000016602	-6.59033	1.58712e-22	FALSE	FALSE	FALSE
IGF1	ENSG00000017427	3.07578	1.74983e-13	FALSE	FALSE	FALSE
SLC38A5	ENSG00000017483	-2.45041	6.42007e-09	FALSE	FALSE	FALSE
VSIG2	ENSG00000019102	-4.98981	2.85172e-23	FALSE	FALSE	FALSE
CYP24A1	ENSG00000019186	-4.94989	4.34956e-13	FALSE	FALSE	FALSE
SYT13	ENSG00000019505	2.31371	0.000203347	FALSE	FALSE	FALSE
SNAI2	ENSG00000019549	-3.19447	3.04957e-20	FALSE	FALSE	FALSE
PLEKHB1	ENSG00000021300	3.30041	7.00735e-18	FALSE	FALSE	FALSE
SLC7A9	ENSG00000021488	2.04604	9.44524e-06	FALSE	FALSE	FALSE
C8B	ENSG00000021852	4.15577	8.32887e-07	FALSE	FALSE	FALSE
GRAMD1B	ENSG00000023171	2.40972	1.95497e-11	FALSE	FALSE	FALSE
ABCC2	ENSG00000023839	2.44853	9.51923e-08	FALSE	FALSE	FALSE
VIM	ENSG00000026025	2.07895	3.85402e-13	TRUE	FALSE	FALSE
INSRR	ENSG00000027644	3.44681	3.72069e-11	FALSE	FALSE	FALSE
IKZF2	ENSG00000030419	-2.14913	1.76679e-15	FALSE	FALSE	FALSE
NA	ENSG00000031544	2.62313	9.30052e-14	FALSE	FALSE	FALSE
MYOC	ENSG00000034971	5.58639	2.80571e-14	FALSE	FALSE	FALSE
OTC	ENSG00000036473	4.06082	1.24034e-07	FALSE	FALSE	FALSE
SLC18A1	ENSG00000036565	2.57561	6.8963e-06	FALSE	FALSE	FALSE
CASR	ENSG00000036828	4.42743	1.01632e-10	FALSE	FALSE	FALSE
C6	ENSG00000039537	6.77121	2.43847e-26	FALSE	FALSE	FALSE
BEST2	ENSG00000039987	-2.42177	7.28989e-06	FALSE	FALSE	FALSE
CDH10	ENSG00000040731	-2.91704	0.00041408	FALSE	FALSE	FALSE
RAB27B	ENSG00000041353	-3.36397	4.36208e-16	FALSE	FALSE	FALSE
ADAM28	ENSG00000042980	2.26263	5.67681e-10	FALSE	FALSE	FALSE
GUCA2B	ENSG00000044012	4.66501	6.37601e-07	FALSE	FALSE	FALSE
EPHA3	ENSG00000044524	-2.11806	2.04895e-06	FALSE	FALSE	FALSE
GPM6B	ENSG00000046653	2.29475	3.04861e-16	FALSE	FALSE	FALSE
PREX2	ENSG00000046889	3.4276	1.65346e-22	FALSE	FALSE	FALSE
CP	ENSG00000047457	2.43692	1.18883e-05	FALSE	FALSE	FALSE
ROS1	ENSG00000047936	2.96153	3.63198e-05	FALSE	FALSE	FALSE
HDAC9	ENSG00000048052	2.13914	6.24939e-10	TRUE	FALSE	FALSE
TNFRSF17	ENSG00000048462	2.06874	0.000129884	FALSE	FALSE	FALSE
LMO3	ENSG00000048540	3.27831	2.56637e-10	FALSE	FALSE	FALSE
COL9A2	ENSG00000049089	3.14068	2.29748e-15	FALSE	FALSE	FALSE
NA	ENSG00000049319	2.89431	7.61259e-08	FALSE	FALSE	FALSE
NEXMIF	ENSG00000050030	2.77366	1.65114e-07	FALSE	FALSE	FALSE
COL23A1	ENSG00000050767	4.44195	2.54269e-25	FALSE	FALSE	FALSE
ALX4	ENSG00000052850	4.03192	8.47402e-13	FALSE	FALSE	FALSE
FSTL4	ENSG00000053108	-2.56031	2.05046e-06	FALSE	FALSE	FALSE
METTL24	ENSG00000053328	4.14963	1.1385e-21	FALSE	FALSE	FALSE
NNAT	ENSG00000053438	-5.8344	1.03548e-58	FALSE	FALSE	FALSE
ENTPD2	ENSG00000054179	2.12053	1.29989e-06	FALSE	FALSE	FALSE
KCNH2	ENSG00000055118	2.32939	1.52603e-06	FALSE	FALSE	FALSE
ITIH1	ENSG00000055957	3.33536	3.81374e-08	FALSE	FALSE	FALSE
NPFFR2	ENSG00000056291	2.52627	0.0012191	FALSE	FALSE	FALSE
PHF21B	ENSG00000056487	-2.09411	0.000662389	FALSE	FALSE	FALSE
SERPINB3	ENSG00000057149	-4.69539	4.15501e-07	FALSE	FALSE	FALSE
F7	ENSG00000057593	4.19743	9.18737e-14	FALSE	FALSE	FALSE
GNA15	ENSG00000060558	-2.71046	5.25722e-19	FALSE	FALSE	FALSE
CREB3L3	ENSG00000060566	3.39016	3.27046e-08	FALSE	FALSE	FALSE
RIMBP2	ENSG00000060709	3.77221	7.49339e-10	FALSE	FALSE	FALSE
COL11A1	ENSG00000060718	-2.91545	7.39481e-06	FALSE	FALSE	FALSE
BCAT1	ENSG00000060982	2.43685	5.00396e-10	FALSE	FALSE	FALSE
SLC6A16	ENSG00000063127	2.04449	1.86741e-10	FALSE	FALSE	FALSE
DMRT3	ENSG00000064218	2.03099	0.00277875	FALSE	FALSE	FALSE
NGFR	ENSG00000064300	-2.31044	1.15594e-06	FALSE	FALSE	TRUE
EYA2	ENSG00000064655	2.69805	6.01612e-08	FALSE	FALSE	FALSE
BCAS1	ENSG00000064787	-3.70631	6.55147e-12	FALSE	FALSE	FALSE
SLC9A3R2	ENSG00000065054	2.39823	1.00893e-21	FALSE	FALSE	FALSE
NTN1	ENSG00000065320	2.01072	1.01501e-06	FALSE	FALSE	FALSE
COL17A1	ENSG00000065618	-5.24423	1.76039e-23	FALSE	FALSE	FALSE
CTNNA2	ENSG00000066032	5.13858	1.55056e-12	FALSE	FALSE	FALSE
CLDN18	ENSG00000066405	3.85155	6.22618e-10	FALSE	FALSE	FALSE
ACSM2B	ENSG00000066813	4.1527	4.49336e-09	FALSE	FALSE	FALSE
DDX3Y	ENSG00000067048	-10.211	1.16763e-34	FALSE	FALSE	FALSE
ZFY	ENSG00000067646	-8.64002	5.0154e-24	FALSE	FALSE	FALSE
FGFR3	ENSG00000068078	-3.03545	1.7425e-12	TRUE	FALSE	TRUE
ST6GALNAC1	ENSG00000070526	2.17298	7.48544e-06	FALSE	FALSE	FALSE
FRMPD1	ENSG00000070601	2.63194	5.23272e-08	FALSE	FALSE	FALSE
SLC12A3	ENSG00000070915	5.2448	8.326e-26	FALSE	FALSE	FALSE
MOV10L1	ENSG00000073146	2.29553	3.31892e-08	FALSE	TRUE	FALSE
TP63	ENSG00000073282	-7.17031	4.82254e-53	FALSE	FALSE	FALSE
DHRS9	ENSG00000073737	-2.11703	1.87743e-05	FALSE	FALSE	FALSE
CD5L	ENSG00000073754	2.39514	0.0016251	FALSE	FALSE	FALSE
PTGS2	ENSG00000073756	-2.58229	7.36349e-07	FALSE	FALSE	FALSE
ST6GAL1	ENSG00000073849	2.13661	1.10853e-13	FALSE	FALSE	FALSE
CDHR2	ENSG00000074276	3.29266	6.94512e-14	FALSE	FALSE	FALSE
SNCB	ENSG00000074317	2.05004	0.00106779	FALSE	FALSE	FALSE
SLC12A1	ENSG00000074803	3.81591	1.57273e-08	FALSE	FALSE	FALSE
WSCD2	ENSG00000075035	-3.67841	1.62497e-10	FALSE	FALSE	FALSE
TUBA3D	ENSG00000075886	3.51187	7.48027e-14	FALSE	FALSE	FALSE
PAX2	ENSG00000075891	9.26181	5.07165e-40	FALSE	FALSE	FALSE
CTTNBP2	ENSG00000077063	2.33454	9.17761e-07	FALSE	FALSE	FALSE
CAPN6	ENSG00000077274	6.10907	7.76472e-21	FALSE	FALSE	FALSE
FGFR1	ENSG00000077782	3.30912	1.45094e-24	TRUE	FALSE	FALSE
RBFOX1	ENSG00000078328	-3.31379	2.72782e-05	FALSE	FALSE	FALSE
ADCYAP1R1	ENSG00000078549	4.24788	1.13899e-17	FALSE	FALSE	FALSE
FGF20	ENSG00000078579	5.59126	1.73346e-19	FALSE	FALSE	FALSE
MYH7B	ENSG00000078814	5.34006	1.72626e-47	FALSE	FALSE	FALSE
BPIFB2	ENSG00000078898	6.93606	6.66321e-15	FALSE	FALSE	FALSE
CLUL1	ENSG00000079101	3.5691	1.32239e-17	FALSE	FALSE	FALSE
CDH17	ENSG00000079112	4.54957	5.40393e-15	FALSE	FALSE	FALSE
SCGN	ENSG00000079689	3.64708	1.28034e-06	FALSE	FALSE	FALSE
DCT	ENSG00000080166	4.20702	1.09601e-13	FALSE	FALSE	FALSE
SCTR	ENSG00000080293	4.69381	6.38432e-19	FALSE	FALSE	FALSE
CFHR2	ENSG00000080910	3.97165	0.000912696	FALSE	FALSE	FALSE
AFP	ENSG00000081051	4.36647	7.68287e-10	FALSE	FALSE	FALSE
COL4A4	ENSG00000081052	3.41681	1.79458e-18	FALSE	FALSE	FALSE
IMPG2	ENSG00000081148	2.36312	6.57209e-10	FALSE	FALSE	FALSE
CACNA1S	ENSG00000081248	7.67062	9.06035e-28	FALSE	FALSE	FALSE
PKP1	ENSG00000081277	-6.19333	1.18281e-28	FALSE	FALSE	FALSE
LRP2	ENSG00000081479	3.98901	6.31042e-11	FALSE	FALSE	FALSE
PCDHA6	ENSG00000081842	3.90653	5.76002e-11	FALSE	FALSE	FALSE
IL12RB2	ENSG00000081985	-2.13054	4.90973e-06	FALSE	FALSE	FALSE
PGR	ENSG00000082175	6.41381	1.80007e-38	TRUE	FALSE	FALSE
OPRK1	ENSG00000082556	3.28237	2.12605e-05	FALSE	FALSE	FALSE
SEMA5B	ENSG00000082684	2.21944	2.97885e-08	FALSE	FALSE	FALSE
OVGP1	ENSG00000085465	2.87194	1.44433e-13	FALSE	FALSE	FALSE
PILRA	ENSG00000085514	2.72004	1.71739e-20	FALSE	FALSE	FALSE
ABCB1	ENSG00000085563	2.05983	2.18542e-07	FALSE	FALSE	FALSE
WNT11	ENSG00000085741	2.83343	1.31701e-07	FALSE	FALSE	FALSE
AQP6	ENSG00000086159	4.56993	1.26321e-14	FALSE	FALSE	FALSE
FOLH1	ENSG00000086205	3.08525	4.71973e-14	FALSE	FALSE	FALSE
FAT2	ENSG00000086570	-2.60292	3.84301e-09	TRUE	FALSE	FALSE
HSD17B2	ENSG00000086696	-3.56589	5.1701e-11	FALSE	FALSE	FALSE
MYBPC2	ENSG00000086967	3.69994	1.37558e-12	FALSE	FALSE	FALSE
TMPRSS11E	ENSG00000087128	-4.5499	1.90446e-08	FALSE	FALSE	FALSE
MT3	ENSG00000087250	4.27735	3.29208e-12	FALSE	FALSE	FALSE
PTHLH	ENSG00000087494	-2.92853	1.0445e-07	FALSE	FALSE	FALSE
FER1L4	ENSG00000088340	-3.06347	2.81611e-11	FALSE	FALSE	FALSE
TMEM40	ENSG00000088726	-4.59736	5.71648e-17	FALSE	FALSE	FALSE
CPXM1	ENSG00000088882	2.08842	4.06585e-07	FALSE	FALSE	FALSE
LZTS3	ENSG00000088899	2.87156	7.37929e-24	FALSE	FALSE	FALSE
F11	ENSG00000088926	3.41501	7.56257e-07	FALSE	FALSE	FALSE
CFAP61	ENSG00000089101	3.41445	9.18455e-13	FALSE	FALSE	FALSE
LHX5	ENSG00000089116	-4.25449	1.08771e-10	FALSE	FALSE	FALSE
TBX5	ENSG00000089225	-4.23639	1.95746e-09	FALSE	FALSE	FALSE
NOS1	ENSG00000089250	3.79555	8.72027e-11	FALSE	FALSE	FALSE
FXYD3	ENSG00000089356	-2.20116	1.36249e-05	FALSE	FALSE	FALSE
KCNH4	ENSG00000089558	-2.21712	3.44384e-10	FALSE	FALSE	FALSE
SI	ENSG00000090402	7.12491	2.8368e-11	FALSE	FALSE	FALSE
THPO	ENSG00000090534	2.4898	5.55455e-07	FALSE	FALSE	FALSE
CHRD	ENSG00000090539	3.18712	3.8903e-17	FALSE	FALSE	FALSE
NA	ENSG00000090920	2.10559	9.90595e-06	FALSE	FALSE	FALSE
NRCAM	ENSG00000091129	3.29448	3.27602e-12	FALSE	FALSE	FALSE
SLC26A3	ENSG00000091138	2.93072	3.81164e-06	FALSE	FALSE	FALSE
IL5RA	ENSG00000091181	3.66666	1.78644e-12	FALSE	FALSE	FALSE
ABCC6	ENSG00000091262	2.90229	2.46068e-19	FALSE	FALSE	FALSE
TF	ENSG00000091513	2.58292	9.34298e-06	FALSE	FALSE	FALSE
APOH	ENSG00000091583	4.24784	1.1935e-08	FALSE	FALSE	FALSE
CPA1	ENSG00000091704	3.60811	1.94873e-07	FALSE	FALSE	FALSE
ESR1	ENSG00000091831	5.67816	6.5447e-46	FALSE	FALSE	FALSE
MYH7	ENSG00000092054	2.23586	0.00388563	FALSE	FALSE	FALSE
TGM1	ENSG00000092295	-2.63632	2.93058e-09	FALSE	FALSE	FALSE
TBL1Y	ENSG00000092377	-4.31104	1.55926e-05	FALSE	FALSE	FALSE
COL9A3	ENSG00000092758	2.05711	0.000180051	FALSE	FALSE	FALSE
TEKT2	ENSG00000092850	3.78904	1.47222e-18	FALSE	FALSE	FALSE
VNN3	ENSG00000093134	2.77028	1.04145e-07	FALSE	FALSE	FALSE
GABRP	ENSG00000094755	3.88851	2.3455e-10	FALSE	FALSE	FALSE
KRT31	ENSG00000094796	-2.29533	0.00593051	FALSE	FALSE	FALSE
FMO2	ENSG00000094963	2.83136	2.16236e-08	FALSE	FALSE	FALSE
NXPE1	ENSG00000095110	3.01191	1.58356e-05	FALSE	FALSE	FALSE
WHRN	ENSG00000095397	2.01617	1.34478e-13	FALSE	FALSE	FALSE
CYP26A1	ENSG00000095596	2.92925	1.13684e-06	FALSE	FALSE	FALSE
TDRD1	ENSG00000095627	2.84223	7.36019e-05	FALSE	TRUE	FALSE
TPSD1	ENSG00000095917	2.10698	0.00218464	FALSE	FALSE	FALSE
SMIM24	ENSG00000095932	4.67581	1.22617e-20	FALSE	FALSE	FALSE
PGC	ENSG00000096088	2.84055	0.000309967	FALSE	FALSE	FALSE
MAGEB2	ENSG00000099399	-4.18876	0.000813358	FALSE	FALSE	FALSE
PRKY	ENSG00000099725	-6.08566	5.43904e-18	FALSE	FALSE	FALSE
IGFALS	ENSG00000099769	5.20384	4.88515e-25	FALSE	FALSE	FALSE
CDHR5	ENSG00000099834	4.28095	4.93776e-17	FALSE	FALSE	FALSE
PALM	ENSG00000099864	2.06926	1.16561e-09	FALSE	FALSE	FALSE
SUSD2	ENSG00000099994	2.31664	2.70669e-09	FALSE	FALSE	FALSE
SEC14L3	ENSG00000100012	4.11828	1.47179e-08	FALSE	FALSE	FALSE
UPB1	ENSG00000100024	2.03988	2.66336e-05	FALSE	FALSE	FALSE
GGT1	ENSG00000100031	3.28139	1.16485e-19	FALSE	FALSE	FALSE
LGALS2	ENSG00000100079	2.78172	4.47372e-10	FALSE	FALSE	FALSE
SH3BP1	ENSG00000100092	-2.02417	3.29047e-20	FALSE	FALSE	FALSE
SEZ6L	ENSG00000100095	2.10881	0.000749976	FALSE	FALSE	FALSE
CRYBB1	ENSG00000100122	3.78791	1.93529e-27	FALSE	FALSE	FALSE
SOX10	ENSG00000100146	-2.37027	0.000138291	FALSE	FALSE	FALSE
SLC5A1	ENSG00000100170	3.51668	1.65083e-09	FALSE	FALSE	FALSE
SLC5A4	ENSG00000100191	2.75359	1.6446e-11	FALSE	FALSE	FALSE
CYP2D6	ENSG00000100197	3.59601	2.70659e-25	FALSE	FALSE	FALSE
RSPH14	ENSG00000100218	3.61715	1.90572e-20	FALSE	FALSE	FALSE
TIMP3	ENSG00000100234	-2.49691	1.4197e-13	FALSE	FALSE	FALSE
MIOX	ENSG00000100253	2.57319	1.74671e-06	FALSE	FALSE	FALSE
NEFH	ENSG00000100285	2.60668	4.38681e-07	FALSE	FALSE	FALSE
ACR	ENSG00000100312	2.36001	1.13154e-08	FALSE	FALSE	FALSE
PNPLA5	ENSG00000100341	2.73965	0.000976312	FALSE	FALSE	FALSE
PNPLA3	ENSG00000100344	2.34132	5.49701e-08	FALSE	FALSE	FALSE
UPK3A	ENSG00000100373	-7.46788	3.97628e-46	FALSE	FALSE	FALSE
CCDC198	ENSG00000100557	4.68593	1.94507e-16	FALSE	FALSE	FALSE
CHGA	ENSG00000100604	4.27838	1.63487e-09	FALSE	FALSE	FALSE
GALNT16	ENSG00000100626	2.54541	8.5489e-10	FALSE	FALSE	FALSE
SLC10A1	ENSG00000100652	-6.31571	1.47922e-44	FALSE	FALSE	FALSE
SERPINA4	ENSG00000100665	3.59246	5.92004e-07	FALSE	FALSE	FALSE
DHRS2	ENSG00000100867	-3.41165	9.60817e-08	FALSE	FALSE	FALSE
CPNE6	ENSG00000100884	3.46837	4.08114e-09	FALSE	FALSE	TRUE
REC8	ENSG00000100918	3.34432	1.52949e-24	FALSE	TRUE	FALSE
SGK2	ENSG00000101049	3.21784	8.07602e-18	FALSE	FALSE	FALSE
HNF4A	ENSG00000101076	5.47286	4.41111e-21	FALSE	FALSE	FALSE
RIMS4	ENSG00000101098	2.27742	3.6078e-05	FALSE	FALSE	FALSE
DOK5	ENSG00000101134	2.33857	1.46631e-08	FALSE	FALSE	FALSE
BIRC7	ENSG00000101197	4.65935	3.16274e-18	FALSE	FALSE	FALSE
NKAIN4	ENSG00000101198	4.41305	1.37783e-14	FALSE	FALSE	FALSE
PTK6	ENSG00000101213	-3.35219	2.35683e-19	FALSE	FALSE	FALSE
SPEF1	ENSG00000101222	5.17577	1.21619e-39	FALSE	FALSE	FALSE
FERMT1	ENSG00000101311	-2.76605	8.39328e-09	FALSE	FALSE	FALSE
HAO1	ENSG00000101323	2.70585	0.00445335	FALSE	FALSE	FALSE
PDYN	ENSG00000101327	4.39693	4.10494e-07	FALSE	FALSE	FALSE
PLCB4	ENSG00000101333	2.70357	7.69537e-14	FALSE	FALSE	FALSE
TLDC2	ENSG00000101342	2.10769	1.70662e-12	FALSE	FALSE	FALSE
BPI	ENSG00000101425	3.09618	2.00104e-07	FALSE	FALSE	FALSE
WFDC2	ENSG00000101443	5.46597	3.05595e-27	FALSE	FALSE	FALSE
MAP1LC3A	ENSG00000101460	2.06705	1.19643e-14	FALSE	FALSE	FALSE
ST8SIA5	ENSG00000101638	2.84678	1.23437e-09	FALSE	FALSE	FALSE
LAMA1	ENSG00000101680	4.98189	1.01388e-25	FALSE	FALSE	FALSE
RHOXF1	ENSG00000101883	3.5365	3.40367e-12	FALSE	FALSE	FALSE
PAGE4	ENSG00000101951	3.77538	0.000577162	FALSE	FALSE	FALSE
BMX	ENSG00000102010	2.44764	2.17116e-09	FALSE	FALSE	FALSE
PCSK1N	ENSG00000102109	3.42955	4.18922e-09	FALSE	FALSE	FALSE
VGLL1	ENSG00000102243	-3.26382	2.89921e-06	FALSE	FALSE	FALSE
SRPX2	ENSG00000102359	-2.62813	1.32253e-10	FALSE	FALSE	FALSE
RUBCNL	ENSG00000102445	2.22581	5.54386e-11	FALSE	FALSE	FALSE
CAB39L	ENSG00000102547	-2.71226	6.87691e-27	FALSE	FALSE	FALSE
FGF9	ENSG00000102678	5.22442	3.39767e-21	FALSE	FALSE	FALSE
ACOD1	ENSG00000102794	2.07727	0.00974354	FALSE	FALSE	FALSE
OLFM4	ENSG00000102837	2.38801	0.00702851	FALSE	FALSE	FALSE
MSLN	ENSG00000102854	5.48157	8.39056e-16	FALSE	FALSE	FALSE
GDPD3	ENSG00000102886	-3.05846	8.09193e-19	FALSE	FALSE	FALSE
TSNAXIP1	ENSG00000102904	2.20711	1.72706e-14	FALSE	FALSE	FALSE
CBLN1	ENSG00000102924	2.20819	6.95571e-05	FALSE	FALSE	FALSE
CCL17	ENSG00000102970	-2.27619	9.40431e-06	FALSE	FALSE	FALSE
HAS3	ENSG00000103044	-4.53657	4.52413e-37	FALSE	FALSE	FALSE
CRYM	ENSG00000103316	2.45675	1.79969e-06	FALSE	FALSE	FALSE
AQP8	ENSG00000103375	2.54969	4.1055e-05	FALSE	FALSE	FALSE
SALL1	ENSG00000103449	5.55025	4.14085e-28	FALSE	FALSE	FALSE
QPRT	ENSG00000103485	2.81415	7.93131e-16	FALSE	FALSE	FALSE
XYLT1	ENSG00000103489	-2.43555	9.43733e-16	FALSE	FALSE	FALSE
TMC5	ENSG00000103534	2.84724	4.63243e-08	FALSE	FALSE	FALSE
HOMER2	ENSG00000103942	2.6744	5.75956e-15	FALSE	FALSE	FALSE
OCA2	ENSG00000104044	2.43598	0.000135337	FALSE	FALSE	FALSE
RHOV	ENSG00000104140	-2.19146	4.30092e-06	FALSE	FALSE	FALSE
MYEF2	ENSG00000104177	2.01057	9.67926e-10	FALSE	FALSE	FALSE
RP1	ENSG00000104237	3.28009	1.84085e-08	FALSE	FALSE	FALSE
TRPA1	ENSG00000104321	-2.90515	1.1212e-06	FALSE	FALSE	FALSE
CALB1	ENSG00000104327	-4.15812	1.38903e-12	FALSE	FALSE	FALSE
PLAT	ENSG00000104368	-2.76214	2.10898e-13	FALSE	FALSE	FALSE
DKK4	ENSG00000104371	5.32465	5.34736e-16	FALSE	FALSE	FALSE
STMN2	ENSG00000104435	-2.23423	0.00127747	FALSE	FALSE	FALSE
TRPS1	ENSG00000104447	2.17151	6.65106e-14	FALSE	FALSE	FALSE
NCALD	ENSG00000104490	3.40085	4.62015e-25	FALSE	FALSE	FALSE
ANXA13	ENSG00000104537	4.52948	3.21737e-13	FALSE	FALSE	FALSE
FGL1	ENSG00000104760	6.20393	6.48938e-16	FALSE	FALSE	FALSE
AMH	ENSG00000104899	2.14466	2.62049e-05	FALSE	FALSE	FALSE
DKKL1	ENSG00000104901	2.48456	8.2434e-12	FALSE	FALSE	FALSE
RSPH6A	ENSG00000104941	4.29436	5.85453e-13	FALSE	FALSE	FALSE
IL4I1	ENSG00000104951	5.31691	4.1185e-43	FALSE	FALSE	FALSE
EPHX3	ENSG00000105131	-2.17272	2.5959e-06	FALSE	FALSE	FALSE
CASP14	ENSG00000105141	-4.77839	8.56722e-08	FALSE	FALSE	FALSE
SLC1A6	ENSG00000105143	-7.34359	6.43149e-27	FALSE	FALSE	FALSE
CLC	ENSG00000105205	2.27613	0.00315382	FALSE	FALSE	FALSE
EBI3	ENSG00000105246	2.76034	1.11568e-13	FALSE	FALSE	FALSE
TJP3	ENSG00000105289	2.21324	2.69227e-10	FALSE	FALSE	FALSE
SULT2A1	ENSG00000105398	-7.34748	4.04276e-19	FALSE	FALSE	FALSE
CCDC114	ENSG00000105479	3.82132	1.44673e-22	FALSE	FALSE	FALSE
SIGLEC6	ENSG00000105492	-2.75574	3.24043e-07	FALSE	FALSE	FALSE
SIGLEC5	ENSG00000105501	-3.96735	3.19886e-28	FALSE	FALSE	FALSE
FGF21	ENSG00000105550	4.24747	1.769e-06	FALSE	FALSE	FALSE
KLF1	ENSG00000105610	2.00607	1.83978e-05	FALSE	FALSE	FALSE
UPK1A	ENSG00000105668	-6.18378	7.43594e-25	FALSE	FALSE	FALSE
MAG	ENSG00000105695	6.50043	3.257e-24	FALSE	FALSE	FALSE
HPN	ENSG00000105707	9.53771	3.93619e-98	FALSE	FALSE	FALSE
GRIK5	ENSG00000105737	2.59803	1.6308e-09	FALSE	FALSE	FALSE
DLX5	ENSG00000105880	4.28965	8.70623e-21	FALSE	FALSE	FALSE
ATP6V0A4	ENSG00000105929	2.58273	4.36941e-05	FALSE	FALSE	FALSE
HOXA1	ENSG00000105991	-2.34766	6.51385e-10	FALSE	FALSE	FALSE
HOXA13	ENSG00000106031	-3.05913	1.82644e-06	FALSE	FALSE	FALSE
EVX1	ENSG00000106038	-5.37353	3.99837e-14	FALSE	FALSE	FALSE
COBL	ENSG00000106078	3.02309	5.48851e-17	FALSE	FALSE	FALSE
EPHB6	ENSG00000106123	-3.74165	7.23236e-24	FALSE	FALSE	FALSE
NPTX2	ENSG00000106236	2.68968	7.98782e-06	FALSE	FALSE	FALSE
PTPRZ1	ENSG00000106278	-3.14736	1.42187e-06	FALSE	FALSE	FALSE
SERPINE1	ENSG00000106366	-2.92322	2.33988e-11	FALSE	FALSE	FALSE
MOGAT3	ENSG00000106384	6.15516	1.58934e-20	FALSE	FALSE	FALSE
AHR	ENSG00000106546	-2.14809	1.84919e-15	TRUE	FALSE	FALSE
TMEM176B	ENSG00000106565	2.0431	2.10123e-07	FALSE	FALSE	FALSE
GCK	ENSG00000106633	2.20493	2.74352e-05	FALSE	FALSE	FALSE
AMBP	ENSG00000106927	6.88788	1.32555e-42	FALSE	FALSE	FALSE
GLIS3	ENSG00000107249	2.83222	1.13899e-17	FALSE	FALSE	FALSE
NPDC1	ENSG00000107281	2.1796	1.63647e-12	FALSE	FALSE	FALSE
PTGDS	ENSG00000107317	3.66567	2.13558e-13	FALSE	FALSE	FALSE
GATA3	ENSG00000107485	-5.59448	2.87602e-42	TRUE	FALSE	FALSE
ATRNL1	ENSG00000107518	2.004	0.000104286	FALSE	FALSE	FALSE
PKD2L1	ENSG00000107593	2.20459	8.045e-07	FALSE	FALSE	FALSE
CUBN	ENSG00000107611	2.38947	8.12999e-11	FALSE	FALSE	FALSE
NA	ENSG00000107623	2.27488	0.000185944	FALSE	FALSE	FALSE
SPOCK2	ENSG00000107742	2.03204	9.03396e-08	FALSE	FALSE	FALSE
TLX1	ENSG00000107807	-2.14037	0.00215789	FALSE	FALSE	FALSE
KAZALD1	ENSG00000107821	2.71586	2.65444e-16	FALSE	FALSE	FALSE
SORCS1	ENSG00000108018	2.43971	0.000315036	FALSE	FALSE	FALSE
KRT23	ENSG00000108244	-2.14701	0.000916158	FALSE	FALSE	FALSE
RAPGEFL1	ENSG00000108352	-2.5875	1.00878e-17	FALSE	FALSE	FALSE
ASPA	ENSG00000108381	-2.15991	6.57494e-07	FALSE	FALSE	FALSE
HOXB6	ENSG00000108511	2.50452	3.92716e-09	FALSE	FALSE	FALSE
RASD1	ENSG00000108551	3.48942	5.03355e-15	FALSE	FALSE	FALSE
ALDH3A1	ENSG00000108602	-3.81484	9.41539e-14	FALSE	FALSE	FALSE
ASIC2	ENSG00000108684	3.36421	2.87933e-08	FALSE	FALSE	FALSE
NA	ENSG00000108753	3.03399	1.04185e-08	FALSE	FALSE	FALSE
RND2	ENSG00000108830	2.67587	2.23702e-11	FALSE	FALSE	FALSE
FAM20A	ENSG00000108950	4.20515	8.9973e-33	FALSE	FALSE	FALSE
	ENSG00000108958	-2.05078	2.31504e-18	FALSE	FALSE	FALSE
MAP2K6	ENSG00000108984	2.94386	7.59419e-22	FALSE	FALSE	FALSE
FOXN1	ENSG00000109101	-3.38277	2.96596e-10	FALSE	FALSE	FALSE
SULT1E1	ENSG00000109193	-3.66301	9.80049e-08	FALSE	FALSE	FALSE
ODAM	ENSG00000109205	4.00764	3.12076e-06	FALSE	FALSE	FALSE
PF4V1	ENSG00000109272	3.0173	3.98342e-05	FALSE	FALSE	FALSE
INPP4B	ENSG00000109452	-2.39932	4.63163e-13	FALSE	FALSE	FALSE
ANXA10	ENSG00000109511	-4.14714	9.90945e-11	FALSE	FALSE	FALSE
CPZ	ENSG00000109625	-2.11843	5.34804e-06	FALSE	FALSE	FALSE
BST1	ENSG00000109743	-2.36084	4.96447e-13	FALSE	FALSE	FALSE
HGFAC	ENSG00000109758	3.02125	3.5436e-10	FALSE	FALSE	FALSE
FAM149A	ENSG00000109794	3.33722	1.91578e-25	FALSE	FALSE	FALSE
CRYAB	ENSG00000109846	3.0781	7.83579e-13	FALSE	FALSE	FALSE
P2RX3	ENSG00000109991	2.43931	9.4797e-05	FALSE	FALSE	FALSE
CCKBR	ENSG00000110148	2.5086	0.000434861	FALSE	FALSE	FALSE
HPX	ENSG00000110169	2.70828	7.77822e-11	FALSE	FALSE	FALSE
FOLR1	ENSG00000110195	7.56269	9.84552e-45	FALSE	FALSE	FALSE
FOLR3	ENSG00000110203	3.05025	1.41621e-06	FALSE	FALSE	FALSE
APOA4	ENSG00000110244	3.77909	0.000954823	FALSE	FALSE	FALSE
APOC3	ENSG00000110245	4.19055	1.55541e-05	FALSE	FALSE	FALSE
NA	ENSG00000110347	-2.26919	0.000394324	FALSE	FALSE	FALSE
UPK2	ENSG00000110375	-5.05403	1.52537e-23	FALSE	FALSE	FALSE
NECTIN1	ENSG00000110400	-2.64873	1.49162e-21	FALSE	FALSE	FALSE
SCGB2A2	ENSG00000110484	13.2607	2.91077e-49	FALSE	FALSE	FALSE
CALCA	ENSG00000110680	7.73616	2.30647e-17	FALSE	FALSE	FALSE
SOX6	ENSG00000110693	2.1022	4.50754e-09	FALSE	FALSE	FALSE
CLEC2B	ENSG00000110852	-2.28115	4.02386e-13	FALSE	FALSE	FALSE
DAO	ENSG00000110887	3.34468	1.03427e-07	FALSE	FALSE	FALSE
SLC6A12	ENSG00000111181	5.31554	3.90476e-45	FALSE	FALSE	FALSE
MYL2	ENSG00000111245	2.34132	0.00579497	FALSE	FALSE	FALSE
RERGL	ENSG00000111404	2.53876	3.4785e-05	FALSE	FALSE	FALSE
APOBEC1	ENSG00000111701	2.5638	0.00774176	FALSE	FALSE	FALSE
RFX4	ENSG00000111783	4.18877	4.68556e-10	FALSE	FALSE	FALSE
RSPH4A	ENSG00000111834	4.23762	9.59484e-33	FALSE	FALSE	FALSE
ADTRP	ENSG00000111863	-2.1747	2.97677e-06	FALSE	FALSE	FALSE
BMP5	ENSG00000112175	-2.96155	6.98074e-06	FALSE	FALSE	FALSE
RBM24	ENSG00000112183	2.32974	2.47164e-06	FALSE	FALSE	FALSE
TREML2	ENSG00000112195	2.93311	1.42769e-09	FALSE	FALSE	FALSE
KHDRBS2	ENSG00000112232	4.29763	4.39224e-15	FALSE	FALSE	FALSE
VNN1	ENSG00000112299	7.35105	2.97961e-47	FALSE	FALSE	FALSE
VNN2	ENSG00000112303	3.03071	2.47408e-13	FALSE	FALSE	FALSE
SOBP	ENSG00000112320	2.09017	7.21369e-09	FALSE	FALSE	FALSE
NR2E1	ENSG00000112333	-3.14761	2.30621e-05	FALSE	FALSE	FALSE
SLC17A2	ENSG00000112337	3.93652	1.45211e-05	FALSE	FALSE	FALSE
PERP	ENSG00000112378	-2.58745	2.06889e-21	FALSE	FALSE	FALSE
ADGRG6	ENSG00000112414	-2.40746	1.775e-10	FALSE	FALSE	FALSE
UNC93A	ENSG00000112494	2.70516	0.000656201	FALSE	FALSE	FALSE
C6orf118	ENSG00000112539	4.40184	7.90399e-11	FALSE	FALSE	FALSE
PDE10A	ENSG00000112541	-2.04458	2.25868e-06	FALSE	FALSE	FALSE
CLIC5	ENSG00000112782	3.03019	4.37965e-16	FALSE	FALSE	FALSE
MEP1A	ENSG00000112818	3.13624	2.86992e-07	FALSE	FALSE	FALSE
NME5	ENSG00000112981	2.45176	2.43086e-09	FALSE	FALSE	FALSE
HBEGF	ENSG00000113070	-2.26273	2.4219e-12	FALSE	FALSE	FALSE
CDH9	ENSG00000113100	-3.21614	0.00126897	FALSE	FALSE	FALSE
PCDHB3	ENSG00000113205	2.12754	8.25595e-06	FALSE	FALSE	FALSE
HAVCR1	ENSG00000113249	3.36758	3.4334e-08	FALSE	FALSE	FALSE
BTNL8	ENSG00000113303	4.10093	5.95352e-13	FALSE	FALSE	FALSE
CDH6	ENSG00000113361	3.56333	7.48634e-20	FALSE	FALSE	FALSE
NPR3	ENSG00000113389	2.2095	1.98049e-06	FALSE	FALSE	FALSE
IRX4	ENSG00000113430	-3.37492	5.63488e-06	FALSE	FALSE	FALSE
AGXT2	ENSG00000113492	3.90684	2.04218e-07	FALSE	FALSE	FALSE
PRLR	ENSG00000113494	4.15744	4.6969e-21	FALSE	FALSE	FALSE
UNC5A	ENSG00000113763	3.58917	3.81292e-13	FALSE	FALSE	FALSE
KNG1	ENSG00000113889	6.72948	5.96442e-23	FALSE	FALSE	FALSE
HRG	ENSG00000113905	4.15696	2.3631e-08	FALSE	FALSE	FALSE
HGD	ENSG00000113924	8.74503	4.81323e-89	FALSE	FALSE	FALSE
CLDN16	ENSG00000113946	2.38266	6.2413e-06	FALSE	FALSE	FALSE
RBP2	ENSG00000114113	3.80857	3.2654e-12	FALSE	FALSE	FALSE
RBP1	ENSG00000114115	3.45544	5.70168e-20	FALSE	FALSE	FALSE
SERPINI2	ENSG00000114204	4.38837	1.59617e-10	FALSE	FALSE	FALSE
LRRC31	ENSG00000114248	4.6308	1.28137e-15	FALSE	FALSE	FALSE
COL7A1	ENSG00000114270	-2.71899	2.18709e-12	FALSE	FALSE	FALSE
USP9Y	ENSG00000114374	-8.58806	1.59552e-24	FALSE	FALSE	FALSE
C3orf14	ENSG00000114405	-2.35871	1.38839e-12	FALSE	FALSE	FALSE
HHLA2	ENSG00000114455	7.27164	2.29405e-33	FALSE	FALSE	FALSE
UPK1B	ENSG00000114638	-2.95648	0.000125028	FALSE	FALSE	FALSE
AADAC	ENSG00000114771	-3.82452	4.2484e-09	FALSE	FALSE	FALSE
PLCH1	ENSG00000114805	3.34184	1.90462e-18	FALSE	FALSE	FALSE
TNNC1	ENSG00000114854	2.49159	1.88573e-07	FALSE	FALSE	FALSE
IL1A	ENSG00000115008	-4.62881	5.50735e-18	FALSE	FALSE	FALSE
KCNIP3	ENSG00000115041	2.45508	3.04099e-11	FALSE	FALSE	FALSE
POMC	ENSG00000115138	2.50792	2.08306e-08	FALSE	FALSE	FALSE
OTOF	ENSG00000115155	-2.05153	2.32683e-05	FALSE	FALSE	FALSE
GRB14	ENSG00000115290	3.00331	4.54762e-12	FALSE	FALSE	FALSE
TACR1	ENSG00000115353	2.32118	4.44751e-07	FALSE	FALSE	FALSE
EFEMP1	ENSG00000115380	-2.75276	6.35465e-11	FALSE	FALSE	FALSE
REG1A	ENSG00000115386	4.49747	5.36323e-06	FALSE	FALSE	FALSE
DNAH6	ENSG00000115423	3.00582	3.14497e-15	FALSE	FALSE	FALSE
IGFBP2	ENSG00000115457	3.51715	2.53013e-20	FALSE	FALSE	FALSE
ST3GAL5	ENSG00000115525	-2.07878	8.75592e-18	FALSE	FALSE	FALSE
SMYD1	ENSG00000115593	2.97185	0.00269952	FALSE	FALSE	FALSE
IL1RL1	ENSG00000115602	-3.07133	2.22632e-09	FALSE	FALSE	FALSE
SLC5A7	ENSG00000115665	-3.82604	5.11089e-06	FALSE	FALSE	FALSE
DLX2	ENSG00000115844	3.03852	8.93676e-07	FALSE	FALSE	FALSE
LCT	ENSG00000115850	2.09272	0.000386738	FALSE	FALSE	FALSE
SDC1	ENSG00000115884	-3.15174	5.06002e-25	FALSE	FALSE	FALSE
KYNU	ENSG00000115919	-2.20772	6.89676e-09	FALSE	FALSE	FALSE
KISS1R	ENSG00000116014	2.33538	7.73892e-05	FALSE	FALSE	FALSE
VAX2	ENSG00000116035	3.54957	1.99957e-16	FALSE	FALSE	FALSE
ATP6V1B1	ENSG00000116039	4.80267	7.37929e-24	FALSE	FALSE	FALSE
ANGPTL1	ENSG00000116194	3.16737	2.7446e-13	FALSE	FALSE	FALSE
KIAA1324	ENSG00000116299	6.9054	1.5907e-48	FALSE	FALSE	FALSE
FBXO2	ENSG00000116661	2.08477	1.34626e-06	FALSE	FALSE	FALSE
RPE65	ENSG00000116745	-2.14715	0.00164037	FALSE	FALSE	FALSE
CFHR3	ENSG00000116785	-3.51675	1.46054e-09	FALSE	FALSE	FALSE
NR5A2	ENSG00000116833	2.02744	1.24468e-08	FALSE	FALSE	FALSE
MYCL	ENSG00000116990	-3.48895	1.1933e-23	FALSE	FALSE	FALSE
KCNQ4	ENSG00000117013	2.4562	1.45416e-11	FALSE	FALSE	FALSE
PADI2	ENSG00000117115	2.54714	4.24267e-09	FALSE	FALSE	FALSE
ACTL8	ENSG00000117148	3.97998	7.23661e-06	FALSE	FALSE	FALSE
PLA2G2D	ENSG00000117215	3.11634	6.09709e-08	FALSE	FALSE	FALSE
PTCH2	ENSG00000117425	2.8081	3.18573e-23	FALSE	FALSE	FALSE
MROH9	ENSG00000117501	5.25322	1.12126e-16	FALSE	FALSE	FALSE
FMO6P	ENSG00000117507	6.02174	4.76205e-22	FALSE	FALSE	FALSE
PLPPR5	ENSG00000117598	-2.37479	0.00150963	FALSE	FALSE	FALSE
MAN1C1	ENSG00000117643	-3.69288	1.4097e-32	FALSE	FALSE	FALSE
SLC5A9	ENSG00000117834	2.35316	5.78745e-09	FALSE	FALSE	FALSE
MUC5B	ENSG00000117983	10.7104	2.09795e-68	FALSE	FALSE	FALSE
TREH	ENSG00000118094	3.86293	4.52601e-15	FALSE	FALSE	FALSE
MMP8	ENSG00000118113	4.63942	2.9265e-10	FALSE	FALSE	FALSE
APOA1	ENSG00000118137	8.56932	3.65878e-56	FALSE	FALSE	FALSE
CASC1	ENSG00000118307	4.00261	2.3604e-28	FALSE	FALSE	FALSE
LRMP	ENSG00000118308	-3.29635	9.50056e-25	FALSE	FALSE	FALSE
ARG1	ENSG00000118520	-3.01503	1.64292e-10	FALSE	FALSE	FALSE
TCF21	ENSG00000118526	-2.65274	7.28589e-08	FALSE	FALSE	FALSE
SLC16A7	ENSG00000118596	-3.01458	4.22937e-15	FALSE	FALSE	FALSE
CASQ2	ENSG00000118729	-2.22908	1.02848e-05	FALSE	FALSE	FALSE
DNAH7	ENSG00000118997	3.237	8.73505e-17	FALSE	FALSE	FALSE
GDA	ENSG00000119125	4.11399	4.47873e-12	FALSE	FALSE	FALSE
C2orf40	ENSG00000119147	2.18496	2.0835e-05	FALSE	FALSE	FALSE
SLC46A2	ENSG00000119457	-2.12951	1.2383e-06	FALSE	FALSE	FALSE
GPR68	ENSG00000119714	-2.54979	9.86354e-16	FALSE	FALSE	FALSE
EPCAM	ENSG00000119888	2.16194	3.27112e-07	FALSE	FALSE	FALSE
PPP1R3C	ENSG00000119938	-3.40458	1.56375e-19	FALSE	FALSE	FALSE
PRLHR	ENSG00000119973	3.72628	0.00115861	FALSE	FALSE	FALSE
CPN1	ENSG00000120054	3.38454	0.000184234	FALSE	FALSE	FALSE
SFRP5	ENSG00000120057	5.15393	3.01506e-13	FALSE	FALSE	FALSE
HOXB8	ENSG00000120068	2.19176	0.000165341	FALSE	FALSE	FALSE
HOXB5	ENSG00000120075	3.01365	7.68872e-12	FALSE	FALSE	FALSE
INSL4	ENSG00000120211	3.27024	0.000562658	FALSE	FALSE	FALSE
GRIA2	ENSG00000120251	7.03306	7.87446e-25	FALSE	FALSE	FALSE
CCDC170	ENSG00000120262	4.22162	6.8709e-29	FALSE	FALSE	FALSE
TTLL2	ENSG00000120440	3.21885	1.90885e-09	FALSE	FALSE	FALSE
CHRNA2	ENSG00000120903	2.89211	0.000413717	FALSE	FALSE	FALSE
ADRA1A	ENSG00000120907	-3.84717	1.24154e-12	FALSE	FALSE	FALSE
RDH10	ENSG00000121039	2.00225	7.04917e-11	FALSE	FALSE	FALSE
TBX2	ENSG00000121068	-2.43443	9.02333e-14	FALSE	FALSE	FALSE
TBX4	ENSG00000121075	-3.21055	4.25045e-08	FALSE	FALSE	FALSE
CSTA	ENSG00000121552	-4.80021	5.09116e-31	FALSE	FALSE	FALSE
MAPK8IP1	ENSG00000121653	2.14329	2.65444e-16	FALSE	FALSE	FALSE
GJB6	ENSG00000121742	-5.59483	7.2163e-17	FALSE	FALSE	FALSE
FABP3	ENSG00000121769	-4.0553	3.76041e-27	FALSE	FALSE	FALSE
SLITRK3	ENSG00000121871	-3.8414	1.31406e-07	FALSE	FALSE	FALSE
CXCR4	ENSG00000121966	2.21846	1.79564e-13	FALSE	FALSE	FALSE
XPNPEP2	ENSG00000122121	2.19694	8.46803e-05	FALSE	FALSE	FALSE
PAEP	ENSG00000122133	2.5134	0.00169819	FALSE	FALSE	FALSE
OBP2A	ENSG00000122136	6.30366	2.02125e-20	FALSE	FALSE	FALSE
PLG	ENSG00000122194	5.4039	9.58377e-14	FALSE	FALSE	FALSE
KIAA0087	ENSG00000122548	2.81827	7.3262e-06	FALSE	FALSE	FALSE
INHBA	ENSG00000122641	-2.09576	2.13929e-06	FALSE	FALSE	FALSE
DNAI1	ENSG00000122735	6.39664	7.52413e-38	FALSE	FALSE	FALSE
PLAU	ENSG00000122861	-2.68516	2.1161e-14	FALSE	FALSE	FALSE
NME2P1	ENSG00000123009	3.05024	2.70719e-34	FALSE	FALSE	FALSE
ATP7B	ENSG00000123191	2.47973	1.0076e-15	FALSE	FALSE	FALSE
HOXC13	ENSG00000123364	-2.10928	0.0028009	FALSE	FALSE	FALSE
NFE2	ENSG00000123405	3.65262	6.67746e-16	FALSE	FALSE	FALSE
SARDH	ENSG00000123453	2.19273	3.19723e-11	FALSE	FALSE	FALSE
DBH	ENSG00000123454	3.83012	9.71336e-19	FALSE	FALSE	FALSE
COL10A1	ENSG00000123500	-2.85582	1.66089e-07	FALSE	FALSE	FALSE
SERPINA7	ENSG00000123561	3.12105	0.000662389	FALSE	FALSE	FALSE
NRK	ENSG00000123572	-2.02509	0.000945357	FALSE	FALSE	FALSE
C4BPA	ENSG00000123838	8.75528	2.72169e-37	FALSE	FALSE	FALSE
C4BPB	ENSG00000123843	5.00442	2.18198e-20	FALSE	FALSE	FALSE
GPR83	ENSG00000123901	2.83269	2.44761e-10	FALSE	FALSE	FALSE
SLPI	ENSG00000124107	3.63293	3.48161e-10	FALSE	FALSE	FALSE
GDAP1L1	ENSG00000124194	-2.8864	8.46625e-09	FALSE	FALSE	FALSE
GTSF1L	ENSG00000124196	3.38058	1.05226e-07	FALSE	FALSE	FALSE
EDN3	ENSG00000124205	6.21686	1.06059e-17	FALSE	FALSE	FALSE
CDH26	ENSG00000124215	-2.76265	1.08391e-13	FALSE	FALSE	FALSE
C20orf85	ENSG00000124237	9.94576	4.98492e-25	FALSE	FALSE	FALSE
KCNK15	ENSG00000124249	3.8741	2.99682e-14	FALSE	FALSE	FALSE
PCK1	ENSG00000124253	7.93514	6.04638e-36	FALSE	FALSE	FALSE
IL9R	ENSG00000124334	-3.70744	1.8476e-20	FALSE	FALSE	FALSE
POF1B	ENSG00000124429	-2.14421	0.000118146	FALSE	FALSE	FALSE
LYPD3	ENSG00000124466	-4.88725	8.99482e-38	FALSE	FALSE	FALSE
NDP	ENSG00000124479	4.42975	4.017e-14	FALSE	FALSE	FALSE
PACSIN1	ENSG00000124507	2.56606	5.69934e-09	FALSE	FALSE	FALSE
NA	ENSG00000124529	4.23492	1.16745e-14	FALSE	FALSE	FALSE
SLC17A3	ENSG00000124564	3.74125	3.78869e-06	FALSE	FALSE	FALSE
SLC17A1	ENSG00000124568	5.59037	1.40575e-12	FALSE	FALSE	FALSE
HIST1H1D	ENSG00000124575	3.25947	9.05524e-10	FALSE	FALSE	FALSE
SPDEF	ENSG00000124664	4.3811	1.87941e-16	FALSE	FALSE	FALSE
NA	ENSG00000124693	3.98112	2.13558e-13	FALSE	FALSE	FALSE
GNMT	ENSG00000124713	2.12223	3.03488e-08	FALSE	FALSE	FALSE
DNAH8	ENSG00000124721	2.34977	5.03772e-06	FALSE	FALSE	FALSE
CXCL6	ENSG00000124875	-2.74323	2.32786e-05	FALSE	FALSE	FALSE
EREG	ENSG00000124882	-2.65415	0.00014168	FALSE	TRUE	FALSE
MYRF	ENSG00000124920	2.47581	3.55803e-10	FALSE	FALSE	FALSE
SCGB1D2	ENSG00000124935	12.5128	1.44047e-60	FALSE	FALSE	FALSE
SCGB2A1	ENSG00000124939	13.8091	1.81188e-99	FALSE	FALSE	FALSE
KIF25	ENSG00000125337	2.52731	5.51656e-07	FALSE	FALSE	FALSE
TEKT3	ENSG00000125409	3.19089	4.64311e-14	FALSE	FALSE	FALSE
SLC25A35	ENSG00000125434	2.68107	1.40608e-27	FALSE	FALSE	FALSE
PAX8	ENSG00000125618	7.07908	3.58317e-85	FALSE	FALSE	FALSE
C3	ENSG00000125730	2.42796	8.53525e-09	FALSE	FALSE	FALSE
TNFSF14	ENSG00000125735	3.20773	3.42703e-15	FALSE	FALSE	FALSE
GPCPD1	ENSG00000125772	2.11061	4.87396e-26	FALSE	FALSE	FALSE
FOXA2	ENSG00000125798	7.15703	3.82864e-32	TRUE	FALSE	FALSE
LRRN4	ENSG00000125872	2.43531	2.19896e-05	FALSE	FALSE	FALSE
GDF5	ENSG00000125965	5.7143	9.84364e-31	FALSE	FALSE	FALSE
FAM83C	ENSG00000125998	-5.6884	4.9436e-19	FALSE	FALSE	FALSE
GRPR	ENSG00000126010	2.46159	1.37663e-06	FALSE	FALSE	FALSE
AMOT	ENSG00000126016	2.88823	4.18323e-19	FALSE	FALSE	FALSE
F10	ENSG00000126218	2.77198	2.05729e-12	FALSE	FALSE	FALSE
SLURP1	ENSG00000126233	-4.08764	1.64156e-07	FALSE	FALSE	FALSE
FFAR1	ENSG00000126266	3.01585	0.000104307	FALSE	FALSE	FALSE
CCR7	ENSG00000126353	-2.45361	3.00431e-10	FALSE	FALSE	FALSE
PRKCG	ENSG00000126583	3.56078	1.12156e-08	FALSE	FALSE	FALSE
PZP	ENSG00000126838	5.25411	8.39912e-33	FALSE	FALSE	FALSE
OMG	ENSG00000126861	4.42098	1.18745e-32	FALSE	FALSE	FALSE
AIF1L	ENSG00000126878	2.48766	2.692e-13	FALSE	FALSE	FALSE
AVPR2	ENSG00000126895	2.46478	1.02135e-09	FALSE	FALSE	FALSE
BCL11B	ENSG00000127152	-2.83691	2.47237e-14	FALSE	FALSE	FALSE
ATP13A4	ENSG00000127249	2.28668	8.045e-07	FALSE	FALSE	FALSE
TSPAN8	ENSG00000127324	2.37474	0.000117762	FALSE	FALSE	FALSE
BEST3	ENSG00000127325	4.52683	1.08052e-11	FALSE	FALSE	FALSE
CRYGN	ENSG00000127377	2.30614	9.12867e-07	FALSE	FALSE	FALSE
FGFRL1	ENSG00000127418	3.10944	5.69843e-38	FALSE	FALSE	FALSE
VIL1	ENSG00000127831	7.97495	1.01374e-37	FALSE	FALSE	FALSE
TNFRSF19	ENSG00000127863	2.09463	1.62428e-06	FALSE	FALSE	FALSE
GAL3ST1	ENSG00000128242	3.87858	1.39787e-16	FALSE	FALSE	TRUE
BAIAP2L2	ENSG00000128298	2.88223	8.16831e-14	FALSE	FALSE	FALSE
IGLL1	ENSG00000128322	5.06452	3.17884e-14	FALSE	FALSE	FALSE
KRT17	ENSG00000128422	-4.64328	3.39224e-12	FALSE	FALSE	FALSE
CDHR3	ENSG00000128536	2.85081	1.35114e-13	FALSE	FALSE	FALSE
PODXL	ENSG00000128567	2.12787	3.14864e-16	FALSE	FALSE	FALSE
FOXP2	ENSG00000128573	-2.0515	4.78588e-05	FALSE	FALSE	FALSE
LRRC4	ENSG00000128594	2.28977	2.6335e-09	FALSE	FALSE	FALSE
SMO	ENSG00000128602	2.05553	3.00715e-12	TRUE	FALSE	FALSE
LRRC17	ENSG00000128606	2.04875	1.58246e-07	FALSE	FALSE	FALSE
PDE11A	ENSG00000128655	2.21995	6.9361e-07	FALSE	FALSE	FALSE
GAD1	ENSG00000128683	2.7	1.76377e-07	FALSE	FALSE	FALSE
CGNL1	ENSG00000128849	2.59842	2.56301e-15	FALSE	FALSE	FALSE
TPH1	ENSG00000129167	3.73448	1.13472e-19	FALSE	FALSE	FALSE
SOX15	ENSG00000129194	-4.51273	6.90364e-41	FALSE	FALSE	FALSE
CD68	ENSG00000129226	-2.62088	7.92613e-14	FALSE	FALSE	FALSE
ATP1B2	ENSG00000129244	2.30901	8.01271e-09	FALSE	FALSE	FALSE
NA	ENSG00000129270	-4.82479	4.05087e-34	FALSE	FALSE	FALSE
FOXA1	ENSG00000129514	-2.19391	9.70206e-05	TRUE	FALSE	FALSE
CDO1	ENSG00000129596	3.26437	1.07392e-11	FALSE	FALSE	FALSE
FOXJ1	ENSG00000129654	2.63839	2.31999e-05	FALSE	FALSE	FALSE
RPS4Y1	ENSG00000129824	-9.90819	5.47521e-31	FALSE	FALSE	FALSE
CDH15	ENSG00000129910	3.33216	1.22062e-10	FALSE	FALSE	FALSE
LBP	ENSG00000129988	6.96641	1.44699e-21	FALSE	FALSE	FALSE
KCNA5	ENSG00000130037	2.41352	8.06832e-08	FALSE	FALSE	FALSE
NXNL2	ENSG00000130045	4.47483	2.49599e-23	FALSE	FALSE	FALSE
GDPD2	ENSG00000130055	-4.55465	2.72346e-21	FALSE	FALSE	FALSE
APOE	ENSG00000130203	2.29214	3.22115e-10	FALSE	FALSE	FALSE
GADD45G	ENSG00000130222	2.22152	3.86727e-09	FALSE	FALSE	FALSE
DPP6	ENSG00000130226	2.66215	2.84197e-06	FALSE	FALSE	FALSE
KIF1A	ENSG00000130294	4.40678	1.00481e-11	FALSE	FALSE	FALSE
STK33	ENSG00000130413	2.74403	1.29425e-09	FALSE	FALSE	FALSE
CACNG6	ENSG00000130433	2.76151	0.000646731	FALSE	FALSE	FALSE
KLHDC7B	ENSG00000130487	-3.92336	2.45088e-18	FALSE	FALSE	FALSE
IQCN	ENSG00000130518	2.81317	4.28159e-16	FALSE	FALSE	FALSE
TNNT3	ENSG00000130595	-2.50909	7.71994e-05	FALSE	FALSE	FALSE
TNNI2	ENSG00000130598	-5.07898	5.22206e-30	FALSE	FALSE	FALSE
CYP2E1	ENSG00000130649	3.11973	1.23345e-12	FALSE	FALSE	FALSE
GATA5	ENSG00000130700	2.30467	0.00168377	FALSE	FALSE	FALSE
SMPDL3B	ENSG00000130768	2.92369	2.46554e-16	FALSE	FALSE	FALSE
RGN	ENSG00000130988	2.09216	1.32409e-07	FALSE	FALSE	FALSE
TXLNGY	ENSG00000131002	-9.4399	2.02538e-29	FALSE	FALSE	FALSE
ULBP2	ENSG00000131015	-3.05958	7.06962e-16	FALSE	FALSE	FALSE
TTLL9	ENSG00000131044	2.71676	5.01683e-18	FALSE	FALSE	FALSE
COX4I2	ENSG00000131055	2.01384	6.99947e-09	FALSE	FALSE	FALSE
GFAP	ENSG00000131095	4.14742	6.31026e-14	FALSE	FALSE	FALSE
PYY	ENSG00000131096	6.34713	1.7586e-34	FALSE	FALSE	FALSE
CCL25	ENSG00000131142	4.9657	6.46685e-13	FALSE	FALSE	FALSE
IDO1	ENSG00000131203	2.05247	0.000111532	FALSE	FALSE	FALSE
KCNC3	ENSG00000131398	2.15968	6.3556e-11	FALSE	FALSE	FALSE
NAPSA	ENSG00000131400	3.99814	9.57776e-22	FALSE	FALSE	FALSE
NAPSB	ENSG00000131401	4.36774	2.28234e-33	FALSE	FALSE	FALSE
G6PC	ENSG00000131482	2.8178	0.000467734	FALSE	FALSE	FALSE
CA6	ENSG00000131686	6.24151	1.75499e-16	FALSE	FALSE	FALSE
CKMT2	ENSG00000131730	3.37552	4.70418e-16	FALSE	FALSE	FALSE
TNS4	ENSG00000131746	-4.68025	3.91999e-22	FALSE	FALSE	FALSE
PPP1R1B	ENSG00000131771	4.57412	6.9257e-15	FALSE	FALSE	FALSE
RAI2	ENSG00000131831	3.13465	4.98367e-18	FALSE	FALSE	FALSE
KRT17P1	ENSG00000131885	-3.21553	1.24853e-05	FALSE	FALSE	FALSE
NR0B2	ENSG00000131910	6.1447	4.61763e-21	FALSE	FALSE	FALSE
LIN28A	ENSG00000131914	2.99697	6.01493e-05	FALSE	FALSE	FALSE
ABHD12B	ENSG00000131969	2.33192	6.79829e-06	FALSE	FALSE	FALSE
NA	ENSG00000132130	2.39019	0.0096961	FALSE	FALSE	FALSE
NA	ENSG00000132139	2.84734	6.04993e-07	FALSE	FALSE	FALSE
PPARG	ENSG00000132170	-3.06354	8.07546e-21	FALSE	FALSE	FALSE
FCRLA	ENSG00000132185	-2.58163	8.57175e-08	FALSE	FALSE	FALSE
CNGA4	ENSG00000132259	4.16053	1.59763e-27	FALSE	FALSE	FALSE
DDC	ENSG00000132437	5.97734	1.59284e-26	FALSE	FALSE	FALSE
ENAM	ENSG00000132464	5.27165	6.57509e-20	FALSE	FALSE	FALSE
RGS22	ENSG00000132554	3.81687	4.23846e-13	FALSE	FALSE	FALSE
RHBG	ENSG00000132677	-2.36822	9.84551e-05	FALSE	FALSE	FALSE
ATP1A4	ENSG00000132681	-3.9695	2.61685e-16	FALSE	FALSE	FALSE
APCS	ENSG00000132703	6.28369	1.02565e-07	FALSE	FALSE	FALSE
FCRL2	ENSG00000132704	2.24678	2.27082e-05	FALSE	FALSE	FALSE
ACY3	ENSG00000132744	4.67887	1.12098e-24	FALSE	FALSE	FALSE
DMGDH	ENSG00000132837	2.39048	9.15124e-12	FALSE	FALSE	FALSE
BHMT2	ENSG00000132840	3.2172	1.96284e-12	FALSE	FALSE	FALSE
ZBED3	ENSG00000132846	2.52768	2.22989e-32	FALSE	FALSE	FALSE
KANK4	ENSG00000132854	3.3968	5.39036e-11	FALSE	FALSE	FALSE
SLC14A2	ENSG00000132874	6.26855	6.78777e-27	FALSE	FALSE	FALSE
NMUR2	ENSG00000132911	5.4061	5.22613e-14	FALSE	FALSE	FALSE
PDE6A	ENSG00000132915	2.62825	1.51008e-11	FALSE	FALSE	FALSE
HMGB1P5	ENSG00000132967	-2.89979	1.10262e-32	FALSE	FALSE	FALSE
GPR12	ENSG00000132975	-2.76045	0.000858715	FALSE	FALSE	FALSE
MYBPH	ENSG00000133055	3.35125	1.00869e-07	FALSE	FALSE	FALSE
LGR6	ENSG00000133067	3.20186	2.2703e-11	FALSE	FALSE	FALSE
CCNA1	ENSG00000133101	4.5832	3.16547e-19	FALSE	TRUE	FALSE
POSTN	ENSG00000133110	-2.52129	5.55318e-06	FALSE	FALSE	FALSE
STOML3	ENSG00000133115	5.9394	2.13213e-17	FALSE	FALSE	FALSE
RNF128	ENSG00000133135	-3.72102	1.06689e-15	FALSE	FALSE	FALSE
LGALS12	ENSG00000133317	2.07232	0.000218847	FALSE	FALSE	FALSE
HRASLS2	ENSG00000133328	2.40874	2.86879e-06	FALSE	FALSE	FALSE
DYDC2	ENSG00000133665	5.55509	1.01393e-24	FALSE	FALSE	FALSE
NA	ENSG00000133808	-3.34919	2.2402e-22	FALSE	FALSE	FALSE
GSC	ENSG00000133937	2.57815	4.89684e-08	FALSE	FALSE	FALSE
ELP3	ENSG00000134014	2.25759	1.54048e-39	FALSE	FALSE	FALSE
PEBP4	ENSG00000134020	3.24321	1.16589e-08	FALSE	FALSE	FALSE
IRAK2	ENSG00000134070	-2.43958	8.36264e-17	FALSE	FALSE	FALSE
TRPM1	ENSG00000134160	3.06468	3.98119e-07	FALSE	FALSE	FALSE
GSTM1	ENSG00000134184	-3.58215	3.7882e-06	FALSE	FALSE	FALSE
GSTM5	ENSG00000134201	-2.06859	0.000104273	FALSE	FALSE	FALSE
SYT6	ENSG00000134207	-3.40058	7.5837e-14	FALSE	FALSE	FALSE
CHIA	ENSG00000134216	4.79794	8.28899e-12	FALSE	FALSE	FALSE
HMGCS2	ENSG00000134240	-3.77317	2.09194e-07	FALSE	FALSE	FALSE
VTCN1	ENSG00000134258	4.34045	5.18381e-14	FALSE	FALSE	FALSE
GRHL1	ENSG00000134317	-2.99941	1.20885e-22	FALSE	FALSE	FALSE
FST	ENSG00000134363	-2.8999	1.90256e-08	FALSE	FALSE	FALSE
CFHR5	ENSG00000134389	3.86966	0.000320932	FALSE	FALSE	FALSE
ECHDC3	ENSG00000134463	2.24549	2.00374e-10	FALSE	FALSE	FALSE
CABLES1	ENSG00000134508	2.20818	3.05526e-13	FALSE	FALSE	FALSE
SOX5	ENSG00000134532	3.14787	3.0243e-15	FALSE	FALSE	FALSE
SLCO1B1	ENSG00000134538	-2.59871	0.00208118	FALSE	FALSE	FALSE
SPX	ENSG00000134548	4.65428	7.2979e-20	FALSE	FALSE	FALSE
SOX3	ENSG00000134595	5.66627	8.26037e-09	FALSE	FALSE	FALSE
FOLH1B	ENSG00000134612	4.12348	2.38327e-10	FALSE	FALSE	FALSE
SPOCD1	ENSG00000134668	-4.15257	2.28495e-21	FALSE	FALSE	FALSE
DSG3	ENSG00000134757	-5.26995	3.70507e-12	FALSE	FALSE	FALSE
DSG1	ENSG00000134760	-9.43376	1.51527e-41	FALSE	FALSE	FALSE
DSC3	ENSG00000134762	-6.81672	1.06418e-27	FALSE	FALSE	FALSE
DSC1	ENSG00000134765	-6.82898	7.32936e-43	FALSE	FALSE	FALSE
GIF	ENSG00000134812	3.6174	7.03348e-06	FALSE	FALSE	FALSE
TCN1	ENSG00000134827	-2.41294	0.00294227	FALSE	FALSE	FALSE
C5AR2	ENSG00000134830	2.23284	1.68807e-08	FALSE	FALSE	FALSE
CLDN10	ENSG00000134873	3.47557	3.12974e-07	FALSE	FALSE	FALSE
ADAMTS8	ENSG00000134917	2.45937	8.57144e-09	FALSE	FALSE	FALSE
SLC37A2	ENSG00000134955	-3.06606	8.97335e-20	FALSE	FALSE	FALSE
FAM189A2	ENSG00000135063	2.10051	2.10405e-07	FALSE	FALSE	FALSE
MSI1	ENSG00000135097	2.76051	4.66105e-10	FALSE	FALSE	FALSE
HNF1A	ENSG00000135100	4.11699	1.11888e-45	TRUE	FALSE	FALSE
TBX3	ENSG00000135111	-3.6881	1.88871e-24	TRUE	FALSE	FALSE
CCDC146	ENSG00000135205	2.75941	6.02035e-16	FALSE	FALSE	FALSE
CD36	ENSG00000135218	-4.60701	2.94496e-25	FALSE	FALSE	FALSE
UGT2A3	ENSG00000135220	4.07167	1.18074e-06	FALSE	FALSE	FALSE
UGT2B28	ENSG00000135226	-4.10339	4.14498e-06	FALSE	FALSE	FALSE
KCP	ENSG00000135253	2.64528	7.78768e-11	FALSE	FALSE	FALSE
MDFIC	ENSG00000135272	-2.04537	3.76862e-15	FALSE	FALSE	FALSE
EPHA7	ENSG00000135333	2.14018	0.00163336	FALSE	FALSE	FALSE
PRPH	ENSG00000135406	4.00259	2.40093e-15	FALSE	FALSE	FALSE
AGAP2	ENSG00000135439	-2.5138	2.68845e-19	FALSE	FALSE	FALSE
PPP1R1A	ENSG00000135447	2.98826	2.15876e-08	FALSE	FALSE	FALSE
FAIM2	ENSG00000135472	3.23776	5.15196e-12	FALSE	FALSE	FALSE
KRT7	ENSG00000135480	-2.45467	1.22962e-06	FALSE	FALSE	FALSE
KCNH3	ENSG00000135519	4.75491	1.11655e-27	FALSE	FALSE	FALSE
HEY2	ENSG00000135547	4.03884	7.08884e-32	FALSE	FALSE	FALSE
TEC	ENSG00000135605	2.10418	4.04243e-25	FALSE	FALSE	FALSE
AGT	ENSG00000135744	3.37733	5.10042e-12	FALSE	FALSE	FALSE
GPR55	ENSG00000135898	2.06337	1.66837e-06	FALSE	FALSE	FALSE
CHRND	ENSG00000135902	3.63953	1.79227e-06	FALSE	FALSE	FALSE
SLC19A3	ENSG00000135917	3.56651	4.40096e-14	FALSE	FALSE	FALSE
CYP27A1	ENSG00000135929	2.16929	3.64899e-10	FALSE	FALSE	FALSE
CNMD	ENSG00000136110	4.6099	6.75937e-10	FALSE	FALSE	FALSE
CIDEB	ENSG00000136305	-2.39235	2.37699e-12	FALSE	FALSE	FALSE
ALPK3	ENSG00000136383	2.44928	1.62765e-12	FALSE	FALSE	FALSE
MYCBPAP	ENSG00000136449	2.58228	6.95677e-13	FALSE	FALSE	FALSE
SCN2A	ENSG00000136531	3.50684	1.85307e-10	FALSE	FALSE	FALSE
ERMN	ENSG00000136541	4.65575	1.22609e-30	FALSE	FALSE	FALSE
GALNT5	ENSG00000136542	-2.08777	0.000152021	FALSE	FALSE	FALSE
GATA4	ENSG00000136574	3.20315	2.239e-05	FALSE	FALSE	FALSE
IL36G	ENSG00000136688	-4.31849	1.51625e-10	FALSE	FALSE	FALSE
IL1RN	ENSG00000136689	-2.199	4.60378e-07	FALSE	FALSE	FALSE
IL36RN	ENSG00000136695	-5.67653	2.7489e-16	FALSE	FALSE	FALSE
BIN1	ENSG00000136717	2.38846	5.33786e-22	FALSE	FALSE	FALSE
TMOD1	ENSG00000136842	3.12544	1.17116e-14	FALSE	FALSE	FALSE
SLC31A2	ENSG00000136867	-2.00494	5.90028e-13	FALSE	FALSE	FALSE
ALDOB	ENSG00000136872	3.54837	2.75765e-10	FALSE	FALSE	FALSE
KIF12	ENSG00000136883	6.16284	5.23647e-54	FALSE	FALSE	FALSE
WDR38	ENSG00000136918	6.84948	6.16251e-42	FALSE	FALSE	FALSE
GABBR2	ENSG00000136928	-5.10972	5.2835e-18	FALSE	FALSE	FALSE
ENPP2	ENSG00000136960	2.22915	1.66034e-09	FALSE	FALSE	FALSE
NOV	ENSG00000136999	2.18412	2.20094e-09	FALSE	FALSE	FALSE
DMRT1	ENSG00000137090	3.75021	5.78502e-08	FALSE	FALSE	FALSE
SPAG8	ENSG00000137098	2.97357	4.59746e-26	FALSE	FALSE	FALSE
PIM1	ENSG00000137193	-2.26038	3.47521e-18	FALSE	FALSE	FALSE
GMPR	ENSG00000137198	3.77189	1.73003e-25	FALSE	FALSE	FALSE
SLC22A7	ENSG00000137204	2.10987	0.00159159	FALSE	FALSE	FALSE
TINAG	ENSG00000137251	6.23911	4.62308e-15	FALSE	FALSE	FALSE
NA	ENSG00000137259	3.30855	7.30222e-10	FALSE	FALSE	FALSE
GCM1	ENSG00000137270	3.09345	1.03158e-07	FALSE	FALSE	FALSE
FGFBP1	ENSG00000137440	-3.50553	2.13591e-06	FALSE	FALSE	FALSE
TTC29	ENSG00000137473	5.97264	1.97515e-17	FALSE	FALSE	FALSE
SLCO5A1	ENSG00000137571	2.118	2.54515e-06	FALSE	FALSE	FALSE
NXPE4	ENSG00000137634	4.46108	1.57611e-09	FALSE	FALSE	FALSE
MMP7	ENSG00000137673	4.99335	1.70498e-16	FALSE	FALSE	FALSE
MMP20	ENSG00000137674	4.93634	2.3386e-09	FALSE	FALSE	FALSE
TRIM29	ENSG00000137699	-3.30918	1.64585e-10	FALSE	FALSE	FALSE
FXYD2	ENSG00000137731	5.73241	4.36779e-32	FALSE	FALSE	FALSE
MMP13	ENSG00000137745	-5.58279	5.71495e-13	FALSE	FALSE	FALSE
SLC28A2	ENSG00000137860	5.07592	4.59593e-18	FALSE	FALSE	FALSE
STRA6	ENSG00000137868	3.31902	2.45721e-13	FALSE	FALSE	FALSE
GCOM1	ENSG00000137878	-3.19917	6.90213e-12	FALSE	FALSE	FALSE
SLC44A5	ENSG00000137968	-2.61043	1.47165e-05	FALSE	FALSE	FALSE
CLCA2	ENSG00000137975	-8.45695	1.86416e-38	FALSE	FALSE	FALSE
SLC3A1	ENSG00000138079	6.78138	3.46466e-42	FALSE	FALSE	FALSE
CYP2C9	ENSG00000138109	2.18467	0.00105251	FALSE	FALSE	FALSE
BTBD16	ENSG00000138152	-5.69625	7.1478e-28	FALSE	FALSE	FALSE
RBP4	ENSG00000138207	2.24149	0.000645749	FALSE	FALSE	FALSE
GPR87	ENSG00000138271	-5.52852	2.93549e-20	FALSE	FALSE	FALSE
PLA2G12B	ENSG00000138308	3.90435	2.35505e-07	FALSE	FALSE	FALSE
ZNF365	ENSG00000138311	-2.42616	1.13154e-08	FALSE	FALSE	FALSE
MSTN	ENSG00000138379	2.8686	1.15102e-09	FALSE	FALSE	FALSE
MDH1B	ENSG00000138400	2.03502	1.28354e-10	FALSE	FALSE	FALSE
FGF5	ENSG00000138675	-2.65807	0.000878912	FALSE	FALSE	FALSE
BMPR1B	ENSG00000138696	2.61134	2.32436e-06	FALSE	FALSE	FALSE
SHROOM3	ENSG00000138771	2.39672	4.68558e-14	FALSE	FALSE	FALSE
LEF1	ENSG00000138795	2.31819	1.1507e-12	FALSE	FALSE	FALSE
PARVG	ENSG00000138964	3.09396	2.65949e-28	FALSE	FALSE	FALSE
B4GALNT3	ENSG00000139044	2.06587	1.07715e-06	FALSE	FALSE	FALSE
PIK3C2G	ENSG00000139144	5.00029	6.02891e-13	FALSE	FALSE	FALSE
AMIGO2	ENSG00000139211	-2.19066	1.29471e-09	FALSE	FALSE	FALSE
COL2A1	ENSG00000139219	3.4718	5.40366e-07	FALSE	FALSE	FALSE
INHBE	ENSG00000139269	2.19227	9.82512e-07	FALSE	FALSE	FALSE
LGR5	ENSG00000139292	5.29817	1.9824e-18	FALSE	FALSE	FALSE
PTPRQ	ENSG00000139304	-3.31037	9.42881e-08	FALSE	FALSE	FALSE
ASCL1	ENSG00000139352	4.06533	3.39985e-07	FALSE	FALSE	FALSE
CCDC65	ENSG00000139537	2.45012	8.29907e-26	FALSE	FALSE	FALSE
SLC39A5	ENSG00000139540	5.25111	3.28418e-30	FALSE	FALSE	FALSE
RDH16	ENSG00000139547	-2.09499	5.07866e-08	FALSE	FALSE	FALSE
SSTR1	ENSG00000139874	2.83581	3.80553e-09	FALSE	FALSE	FALSE
REM2	ENSG00000139890	2.09041	4.33301e-12	FALSE	FALSE	FALSE
FRMD6	ENSG00000139926	-2.83315	1.63941e-22	FALSE	FALSE	FALSE
RDH12	ENSG00000139988	-2.33574	3.72758e-08	FALSE	FALSE	FALSE
AK7	ENSG00000140057	2.78924	8.20219e-18	FALSE	FALSE	FALSE
FAM181A	ENSG00000140067	2.09881	0.000225733	FALSE	FALSE	FALSE
SLC24A4	ENSG00000140090	2.37994	6.72477e-10	FALSE	FALSE	FALSE
DUOXA1	ENSG00000140254	-2.7876	5.86909e-09	FALSE	FALSE	FALSE
DUOXA2	ENSG00000140274	-2.75568	2.37982e-05	FALSE	FALSE	FALSE
DUOX2	ENSG00000140279	-3.536	3.69382e-10	FALSE	FALSE	FALSE
GCNT3	ENSG00000140297	3.9064	2.01525e-15	FALSE	FALSE	FALSE
CCDC33	ENSG00000140481	6.22777	5.47796e-28	FALSE	FALSE	FALSE
CYP1A2	ENSG00000140505	2.76259	0.000510764	FALSE	FALSE	FALSE
LMAN1L	ENSG00000140506	3.87031	4.42605e-07	FALSE	FALSE	FALSE
HAPLN3	ENSG00000140511	2.55537	8.8744e-14	FALSE	FALSE	FALSE
RLBP1	ENSG00000140522	2.77423	0.000221317	FALSE	FALSE	FALSE
WDR93	ENSG00000140527	2.91969	7.70379e-20	FALSE	FALSE	FALSE
MYLK3	ENSG00000140795	2.31987	3.83847e-08	FALSE	FALSE	FALSE
ABCC12	ENSG00000140798	3.921	8.0891e-06	FALSE	FALSE	FALSE
NKD1	ENSG00000140807	2.82402	5.30557e-11	FALSE	FALSE	FALSE
CHST4	ENSG00000140835	4.30757	7.18776e-13	FALSE	FALSE	FALSE
ADAD2	ENSG00000140955	-2.5875	5.32037e-08	FALSE	FALSE	FALSE
DPEP3	ENSG00000141096	6.43498	1.93529e-27	FALSE	TRUE	FALSE
LRRC46	ENSG00000141294	4.05525	1.56665e-40	FALSE	FALSE	FALSE
GALNT1	ENSG00000141429	-2.22884	1.24906e-39	FALSE	FALSE	FALSE
SLC14A1	ENSG00000141469	-4.17224	1.0757e-16	FALSE	FALSE	FALSE
SLC13A5	ENSG00000141485	4.80087	7.40321e-17	FALSE	FALSE	FALSE
CCDC40	ENSG00000141519	2.52825	5.70315e-19	FALSE	FALSE	FALSE
ZNF750	ENSG00000141579	-2.9545	3.56814e-12	TRUE	FALSE	FALSE
STAC2	ENSG00000141750	2.7996	7.76107e-06	FALSE	FALSE	FALSE
PGGHG	ENSG00000142102	2.16098	1.93099e-08	FALSE	FALSE	FALSE
HUNK	ENSG00000142149	2.03566	7.3589e-07	FALSE	FALSE	FALSE
SIK1	ENSG00000142178	-2.1821	5.7159e-13	FALSE	FALSE	FALSE
IL19	ENSG00000142224	3.71954	6.05435e-09	FALSE	FALSE	FALSE
FBN3	ENSG00000142449	2.1451	0.000729035	FALSE	FALSE	FALSE
TM4SF5	ENSG00000142484	6.45913	2.70311e-16	FALSE	FALSE	FALSE
SLC47A1	ENSG00000142494	4.40726	1.61116e-25	FALSE	FALSE	FALSE
KLK3	ENSG00000142515	2.69922	0.00254761	FALSE	FALSE	FALSE
FAM71E1	ENSG00000142530	2.06999	1.66019e-10	FALSE	FALSE	FALSE
CFAP74	ENSG00000142609	2.48152	5.55825e-07	FALSE	FALSE	FALSE
PADI3	ENSG00000142619	-4.79604	3.91456e-10	FALSE	FALSE	FALSE
MYOM3	ENSG00000142661	2.61949	4.07906e-08	FALSE	FALSE	FALSE
DMRTA2	ENSG00000142700	-2.54173	5.8708e-05	FALSE	FALSE	FALSE
CELA3A	ENSG00000142789	4.28659	5.54632e-06	FALSE	FALSE	FALSE
TINAGL1	ENSG00000142910	-2.44484	2.32779e-15	FALSE	FALSE	FALSE
CYP4B1	ENSG00000142973	-4.74385	1.0173e-16	FALSE	FALSE	FALSE
RXRG	ENSG00000143171	5.94192	1.69475e-25	FALSE	FALSE	FALSE
NECTIN4	ENSG00000143217	-2.71753	1.07032e-09	FALSE	FALSE	FALSE
RORC	ENSG00000143365	2.11945	3.02172e-09	FALSE	FALSE	FALSE
ADAMTSL4	ENSG00000143382	-2.0064	1.44621e-09	FALSE	FALSE	FALSE
SELENBP1	ENSG00000143416	2.57708	9.35205e-13	FALSE	FALSE	FALSE
FLG2	ENSG00000143520	-5.80434	2.82406e-17	FALSE	FALSE	FALSE
S100A8	ENSG00000143546	-3.3694	8.49966e-09	FALSE	FALSE	FALSE
S100A7	ENSG00000143556	-3.31639	0.000207431	FALSE	FALSE	FALSE
PKLR	ENSG00000143627	3.64988	1.19916e-08	FALSE	FALSE	FALSE
LEFTY2	ENSG00000143768	4.16492	9.61622e-12	FALSE	FALSE	FALSE
EPHX1	ENSG00000143819	2.19305	3.10715e-16	FALSE	FALSE	FALSE
REN	ENSG00000143839	3.24197	2.78554e-07	FALSE	FALSE	FALSE
OSR1	ENSG00000143867	-2.65962	1.08582e-09	FALSE	FALSE	FALSE
ATP6V1C2	ENSG00000143882	2.37476	9.06524e-11	FALSE	FALSE	FALSE
ABCG8	ENSG00000143921	2.20268	0.000474845	FALSE	FALSE	FALSE
REG3G	ENSG00000143954	5.55792	1.16733e-06	FALSE	FALSE	FALSE
MEIS1	ENSG00000143995	2.34579	3.19135e-15	FALSE	FALSE	FALSE
ANKRD53	ENSG00000144031	2.35702	9.87869e-14	FALSE	FALSE	FALSE
NAT8	ENSG00000144035	2.15428	9.65966e-05	FALSE	FALSE	FALSE
DQX1	ENSG00000144045	-2.63224	2.46936e-08	FALSE	FALSE	FALSE
C1QL2	ENSG00000144119	3.34905	9.86643e-05	FALSE	FALSE	FALSE
THSD7B	ENSG00000144229	2.82645	5.73013e-09	FALSE	FALSE	FALSE
GPR17	ENSG00000144230	2.22186	1.53224e-06	FALSE	FALSE	FALSE
SCN1A	ENSG00000144285	2.64264	0.000244951	FALSE	FALSE	FALSE
ZNF385B	ENSG00000144331	2.14048	8.74001e-05	FALSE	FALSE	FALSE
ABCA12	ENSG00000144452	-2.51861	1.08113e-06	FALSE	FALSE	FALSE
TRPM8	ENSG00000144481	3.517	7.47555e-10	FALSE	FALSE	FALSE
HES6	ENSG00000144485	2.96842	5.02165e-19	FALSE	FALSE	FALSE
ESPNL	ENSG00000144488	2.51619	4.40554e-07	FALSE	FALSE	FALSE
2018-03-04	ENSG00000144583	-3.00408	6.56599e-11	FALSE	FALSE	FALSE
IL17RD	ENSG00000144730	2.04108	3.88109e-10	FALSE	FALSE	FALSE
LRIG1	ENSG00000144749	2.85853	2.96568e-32	FALSE	FALSE	FALSE
ADGRG7	ENSG00000144820	3.51683	0.00021408	FALSE	FALSE	FALSE
PLA1A	ENSG00000144837	3.5389	7.13702e-21	FALSE	FALSE	FALSE
BOC	ENSG00000144857	2.9338	4.7577e-17	FALSE	FALSE	FALSE
ALDH1L1	ENSG00000144908	-2.30614	3.48724e-06	FALSE	FALSE	FALSE
UCN2	ENSG00000145040	-2.08327	2.62049e-05	FALSE	FALSE	FALSE
TM4SF19	ENSG00000145107	-2.47838	3.54777e-07	FALSE	FALSE	FALSE
SLIT2	ENSG00000145147	2.37283	5.02428e-09	FALSE	FALSE	FALSE
AHSG	ENSG00000145192	2.9783	8.89041e-05	FALSE	FALSE	FALSE
VWA5B2	ENSG00000145198	3.90647	2.43532e-22	FALSE	FALSE	FALSE
SLC10A4	ENSG00000145248	3.52634	9.56654e-13	FALSE	FALSE	FALSE
SLC10A6	ENSG00000145283	-3.59752	2.55103e-18	FALSE	FALSE	FALSE
GC	ENSG00000145321	3.79973	5.02242e-05	FALSE	FALSE	FALSE
DDIT4L	ENSG00000145358	4.183	8.72258e-21	FALSE	FALSE	FALSE
ANK2	ENSG00000145362	2.73795	2.22164e-12	FALSE	FALSE	FALSE
FABP2	ENSG00000145384	4.28669	1.53686e-08	FALSE	FALSE	FALSE
GLRA3	ENSG00000145451	-2.77991	8.14967e-05	FALSE	FALSE	FALSE
ROPN1L	ENSG00000145491	6.51432	4.82832e-46	FALSE	FALSE	FALSE
UGT3A1	ENSG00000145626	4.01903	1.88826e-06	FALSE	FALSE	FALSE
BHMT	ENSG00000145692	-5.90713	1.90747e-25	FALSE	FALSE	FALSE
IQGAP2	ENSG00000145703	2.96347	5.49947e-21	FALSE	FALSE	FALSE
CRHBP	ENSG00000145708	-3.10086	1.95631e-11	FALSE	FALSE	FALSE
LIX1	ENSG00000145721	5.5476	2.45155e-18	FALSE	FALSE	FALSE
TSLP	ENSG00000145777	-2.17435	1.36058e-06	FALSE	FALSE	FALSE
ADAMTS19	ENSG00000145808	3.20906	2.54031e-05	FALSE	FALSE	FALSE
SLC25A48	ENSG00000145832	2.62192	2.20192e-05	FALSE	FALSE	FALSE
TIMD4	ENSG00000145850	2.58689	1.69193e-07	FALSE	FALSE	FALSE
TENM2	ENSG00000145934	-5.19771	1.9058e-22	FALSE	FALSE	FALSE
GFRA3	ENSG00000146013	3.50639	4.25568e-10	FALSE	FALSE	FALSE
DCDC2	ENSG00000146038	5.41167	3.8639e-33	FALSE	FALSE	FALSE
SLC17A4	ENSG00000146039	6.14931	4.26353e-13	FALSE	FALSE	FALSE
KAAG1	ENSG00000146049	6.07832	3.13745e-34	FALSE	FALSE	FALSE
TRIM7	ENSG00000146054	-3.27642	3.41519e-18	FALSE	FALSE	FALSE
TNFRSF21	ENSG00000146072	-2.49816	1.09837e-16	FALSE	FALSE	FALSE
RASGEF1C	ENSG00000146090	2.20425	4.17624e-05	FALSE	FALSE	FALSE
LGSN	ENSG00000146166	3.5836	1.73057e-06	FALSE	FALSE	FALSE
SCUBE3	ENSG00000146197	2.62438	1.15289e-09	FALSE	FALSE	FALSE
TCTE1	ENSG00000146221	3.30497	1.82057e-14	FALSE	FALSE	FALSE
PRSS35	ENSG00000146250	3.12595	1.11511e-10	FALSE	FALSE	FALSE
CLVS2	ENSG00000146352	-3.73327	3.07876e-06	FALSE	FALSE	FALSE
RSPO3	ENSG00000146374	3.41589	2.27452e-12	FALSE	FALSE	FALSE
PNLDC1	ENSG00000146453	2.14275	0.000120621	FALSE	FALSE	FALSE
CREB5	ENSG00000146592	2.46395	6.24104e-11	FALSE	FALSE	FALSE
EGFR	ENSG00000146648	-2.55677	6.04383e-13	TRUE	FALSE	FALSE
LINC00525	ENSG00000146666	-3.51718	4.03163e-11	FALSE	FALSE	FALSE
	ENSG00000146677	2.02885	4.10759e-17	FALSE	FALSE	FALSE
TRIM50	ENSG00000146755	3.7027	3.47465e-09	FALSE	FALSE	FALSE
STRA8	ENSG00000146857	3.48964	9.7616e-07	FALSE	TRUE	FALSE
CNPY1	ENSG00000146910	3.40364	0.000118183	FALSE	FALSE	FALSE
SYTL5	ENSG00000147041	-3.47336	6.0553e-12	FALSE	FALSE	FALSE
RIPPLY1	ENSG00000147223	2.3397	2.3871e-05	FALSE	FALSE	FALSE
CXorf57	ENSG00000147231	-4.44197	2.79114e-29	FALSE	FALSE	FALSE
HTR2C	ENSG00000147246	-2.76923	0.00376657	FALSE	FALSE	FALSE
CHRNA6	ENSG00000147434	2.74998	2.7012e-07	FALSE	FALSE	FALSE
SNTG1	ENSG00000147481	-2.50262	0.00415277	FALSE	FALSE	FALSE
ST18	ENSG00000147488	2.68936	2.19093e-09	FALSE	FALSE	FALSE
CRH	ENSG00000147571	-8.36314	5.03709e-16	FALSE	FALSE	FALSE
TRIM55	ENSG00000147573	5.80788	2.25837e-21	FALSE	FALSE	FALSE
SLC26A7	ENSG00000147606	4.59853	3.20137e-18	FALSE	FALSE	FALSE
SYBU	ENSG00000147642	2.42494	4.42545e-10	FALSE	FALSE	FALSE
DPYS	ENSG00000147647	3.12644	1.71755e-08	FALSE	FALSE	FALSE
FAM83A	ENSG00000147689	-4.55703	2.93055e-14	FALSE	FALSE	FALSE
GSDMC	ENSG00000147697	-2.91082	1.4319e-08	FALSE	FALSE	FALSE
FAM135B	ENSG00000147724	2.59575	4.69972e-05	FALSE	FALSE	FALSE
CRB2	ENSG00000148204	5.15689	5.11733e-27	FALSE	FALSE	FALSE
PTGES	ENSG00000148344	-2.9939	8.08025e-12	FALSE	FALSE	FALSE
LCN2	ENSG00000148346	2.5145	0.000116977	FALSE	FALSE	FALSE
FAM171A1	ENSG00000148468	2.93207	3.39714e-20	FALSE	FALSE	FALSE
SLC39A12	ENSG00000148482	3.42969	4.91524e-06	FALSE	FALSE	FALSE
ST8SIA6	ENSG00000148488	2.0143	0.000154097	FALSE	FALSE	FALSE
A1CF	ENSG00000148584	4.07918	4.83861e-13	FALSE	FALSE	FALSE
CDHR1	ENSG00000148600	2.50107	4.25291e-06	FALSE	FALSE	FALSE
RGR	ENSG00000148604	6.59925	1.05957e-13	FALSE	FALSE	FALSE
HTR7	ENSG00000148680	-4.73358	4.74853e-30	FALSE	FALSE	FALSE
HABP2	ENSG00000148702	7.69666	1.39528e-37	FALSE	FALSE	FALSE
NPFFR1	ENSG00000148734	3.92771	3.16338e-17	FALSE	FALSE	FALSE
PLEKHS1	ENSG00000148735	4.21887	3.08506e-14	FALSE	FALSE	FALSE
CYP17A1	ENSG00000148795	4.02922	3.90022e-13	FALSE	FALSE	FALSE
INA	ENSG00000148798	-2.9552	4.20727e-06	FALSE	FALSE	FALSE
NKX6-2	ENSG00000148826	6.07814	3.09264e-07	FALSE	FALSE	FALSE
SAA4	ENSG00000148965	3.60351	8.56722e-08	FALSE	FALSE	FALSE
SYT8	ENSG00000149043	-3.9326	6.83655e-11	FALSE	FALSE	FALSE
SLC43A1	ENSG00000149150	2.36015	2.22666e-14	FALSE	FALSE	FALSE
PTPRJ	ENSG00000149177	2.2024	6.33074e-17	FALSE	FALSE	FALSE
NCAM1	ENSG00000149294	2.09073	2.39387e-05	FALSE	FALSE	FALSE
HTR3B	ENSG00000149305	3.94742	2.70141e-05	FALSE	FALSE	FALSE
GGTLC1	ENSG00000149435	3.91446	2.05428e-08	FALSE	FALSE	FALSE
ADAM33	ENSG00000149451	2.40301	1.07687e-07	FALSE	FALSE	FALSE
SLC22A8	ENSG00000149452	5.32041	1.6793e-09	FALSE	FALSE	FALSE
PLCH2	ENSG00000149527	-2.65289	3.60756e-10	FALSE	FALSE	FALSE
FEZ1	ENSG00000149557	-2.35636	7.10094e-11	FALSE	FALSE	FALSE
KIRREL3	ENSG00000149571	2.20439	1.81544e-06	FALSE	FALSE	FALSE
MPZL2	ENSG00000149573	-2.04658	2.22347e-13	FALSE	FALSE	FALSE
DUSP15	ENSG00000149599	2.22953	8.79117e-07	FALSE	FALSE	FALSE
CDH22	ENSG00000149654	2.08674	0.00179897	FALSE	FALSE	FALSE
SLC22A9	ENSG00000149742	-3.41417	6.77484e-07	FALSE	FALSE	FALSE
TBX6	ENSG00000149922	-2.24564	1.65724e-16	FALSE	FALSE	FALSE
FAM57B	ENSG00000149926	-2.06067	3.88683e-06	FALSE	FALSE	FALSE
NA	ENSG00000150165	-6.26178	1.19129e-16	FALSE	FALSE	FALSE
KLHL1	ENSG00000150361	4.31497	2.34459e-05	FALSE	FALSE	FALSE
CDH8	ENSG00000150394	-3.44928	4.0388e-11	FALSE	FALSE	FALSE
FAM124A	ENSG00000150510	2.96961	5.30534e-18	FALSE	FALSE	FALSE
NA	ENSG00000150526	3.86972	6.54556e-11	FALSE	FALSE	FALSE
LYPD1	ENSG00000150551	3.78187	6.82415e-19	FALSE	FALSE	FALSE
ADRA2A	ENSG00000150594	2.709	4.37933e-09	FALSE	FALSE	FALSE
SPATA4	ENSG00000150628	2.65301	3.57937e-08	FALSE	FALSE	FALSE
C11orf53	ENSG00000150750	-4.06303	6.64137e-08	FALSE	FALSE	FALSE
C2orf50	ENSG00000150873	3.30853	4.09261e-16	FALSE	FALSE	FALSE
FREM2	ENSG00000150893	3.19553	3.46983e-08	FALSE	FALSE	FALSE
SLC7A11	ENSG00000151012	-2.24555	4.12952e-07	FALSE	FALSE	FALSE
ENKUR	ENSG00000151023	3.88659	5.52842e-20	FALSE	FALSE	FALSE
MAT1A	ENSG00000151224	3.77062	2.70564e-11	FALSE	FALSE	FALSE
NPAS3	ENSG00000151322	5.02032	5.86914e-36	FALSE	FALSE	FALSE
THRSP	ENSG00000151365	4.68193	6.04941e-12	FALSE	FALSE	FALSE
ANO4	ENSG00000151572	2.07063	6.39857e-05	FALSE	FALSE	FALSE
AKR1C2	ENSG00000151632	-2.73277	9.36464e-07	FALSE	FALSE	FALSE
ITIH2	ENSG00000151655	4.21998	1.45083e-18	FALSE	FALSE	FALSE
GABRA2	ENSG00000151834	2.86735	0.000328852	FALSE	FALSE	FALSE
CCL28	ENSG00000151882	2.67146	4.18059e-11	FALSE	FALSE	FALSE
GFRA1	ENSG00000151892	2.45088	1.65999e-05	FALSE	FALSE	FALSE
GLT1D1	ENSG00000151948	2.13822	4.34266e-06	FALSE	FALSE	FALSE
TMEM132D	ENSG00000151952	3.52554	3.75128e-06	FALSE	FALSE	FALSE
CCDC74B	ENSG00000152076	2.59702	3.41302e-10	FALSE	FALSE	FALSE
TMEM178A	ENSG00000152154	2.92053	1.07735e-14	FALSE	FALSE	FALSE
G6PC2	ENSG00000152254	2.40967	0.00650085	FALSE	FALSE	FALSE
NA	ENSG00000152268	3.13255	3.19723e-11	FALSE	FALSE	FALSE
TCF7L1	ENSG00000152284	2.31389	7.76373e-15	FALSE	FALSE	FALSE
ZSCAN1	ENSG00000152467	3.57007	3.64765e-14	FALSE	FALSE	FALSE
SPEF2	ENSG00000152582	2.87512	1.8504e-22	FALSE	FALSE	FALSE
CAPSL	ENSG00000152611	7.73526	2.12071e-32	FALSE	FALSE	FALSE
CLEC4F	ENSG00000152672	3.17417	4.81416e-10	FALSE	FALSE	FALSE
WDR78	ENSG00000152763	2.05988	1.14672e-13	FALSE	FALSE	FALSE
SLC16A12	ENSG00000152779	4.82379	1.03168e-21	FALSE	FALSE	FALSE
BMP3	ENSG00000152785	-2.23266	0.00218464	FALSE	FALSE	FALSE
CNTNAP4	ENSG00000152910	-3.3547	3.42731e-05	FALSE	FALSE	FALSE
PART1	ENSG00000152931	2.11996	0.000538311	FALSE	FALSE	FALSE
ZIC1	ENSG00000152977	3.08593	0.000241477	FALSE	FALSE	FALSE
ACMSD	ENSG00000153086	3.41494	9.27536e-12	FALSE	FALSE	FALSE
CLGN	ENSG00000153132	2.23517	9.24928e-06	FALSE	FALSE	FALSE
PTPRR	ENSG00000153233	-4.08065	1.35855e-15	FALSE	FALSE	FALSE
CCDC148	ENSG00000153237	2.01135	6.34677e-11	FALSE	FALSE	FALSE
SCN3A	ENSG00000153253	3.13016	2.0299e-10	FALSE	FALSE	FALSE
ADGRF1	ENSG00000153292	-2.41251	5.49668e-05	FALSE	FALSE	FALSE
ADGRF4	ENSG00000153294	-3.87503	2.49242e-10	FALSE	FALSE	FALSE
FRMD1	ENSG00000153303	5.22237	2.84048e-13	FALSE	FALSE	FALSE
FAM81B	ENSG00000153347	3.95462	1.62423e-12	FALSE	FALSE	FALSE
C16orf89	ENSG00000153446	5.98599	5.70693e-27	FALSE	FALSE	FALSE
FAM92B	ENSG00000153789	7.11768	3.07461e-31	FALSE	FALSE	FALSE
TMPRSS11D	ENSG00000153802	-2.89336	4.71777e-06	FALSE	FALSE	FALSE
SPHKAP	ENSG00000153820	3.02067	0.00149086	FALSE	FALSE	FALSE
KCNJ16	ENSG00000153822	7.56919	2.21391e-32	FALSE	FALSE	FALSE
ANKFN1	ENSG00000153930	2.71778	1.82841e-05	FALSE	FALSE	FALSE
DNAAF1	ENSG00000154099	4.54701	4.07949e-27	FALSE	FALSE	FALSE
C16orf74	ENSG00000154102	-2.66535	1.19379e-11	FALSE	FALSE	FALSE
RETREG1	ENSG00000154153	2.07723	6.4647e-09	FALSE	FALSE	FALSE
CYP4Z2P	ENSG00000154198	-4.43874	1.85442e-11	FALSE	FALSE	FALSE
CERS3	ENSG00000154227	-6.72393	1.72531e-37	FALSE	FALSE	FALSE
GAL3ST2	ENSG00000154252	3.95737	1.75983e-13	FALSE	FALSE	FALSE
ABCA6	ENSG00000154262	-2.77917	5.84454e-13	FALSE	FALSE	FALSE
ABCA10	ENSG00000154263	-2.33332	1.64347e-11	FALSE	FALSE	FALSE
ENPP3	ENSG00000154269	7.2879	4.09181e-40	FALSE	FALSE	FALSE
TDH	ENSG00000154316	-3.12762	4.74027e-13	FALSE	FALSE	FALSE
FAM167A	ENSG00000154319	3.02225	1.88346e-11	FALSE	FALSE	FALSE
CCDC173	ENSG00000154479	3.0661	1.18368e-15	FALSE	FALSE	FALSE
SRSF12	ENSG00000154548	2.53362	1.80102e-12	FALSE	FALSE	FALSE
SORBS2	ENSG00000154556	2.14071	5.56351e-11	FALSE	FALSE	FALSE
TMSB4Y	ENSG00000154620	-5.63518	1.62104e-13	FALSE	FALSE	FALSE
CHODL	ENSG00000154645	2.18021	1.31948e-05	FALSE	FALSE	FALSE
NCAM2	ENSG00000154654	-2.02439	6.90147e-05	FALSE	FALSE	FALSE
WNT7A	ENSG00000154764	2.96279	4.54088e-06	FALSE	FALSE	FALSE
GPR78	ENSG00000155269	-6.06229	2.6335e-15	FALSE	FALSE	FALSE
MAGEC1	ENSG00000155495	-3.93851	0.000658905	FALSE	FALSE	FALSE
GRIA1	ENSG00000155511	2.49264	0.000498962	FALSE	FALSE	FALSE
OTOA	ENSG00000155719	2.1274	6.37137e-09	FALSE	FALSE	FALSE
DEPTOR	ENSG00000155792	2.50191	4.14415e-19	FALSE	FALSE	FALSE
SLC26A2	ENSG00000155850	2.12135	1.34301e-14	FALSE	FALSE	FALSE
ADCY8	ENSG00000155897	3.9401	1.40034e-05	FALSE	FALSE	FALSE
MAGEA8	ENSG00000156009	3.77612	7.92954e-09	FALSE	FALSE	FALSE
WIF1	ENSG00000156076	3.41643	5.48324e-05	FALSE	FALSE	FALSE
UGT2B4	ENSG00000156096	2.4112	0.00309226	FALSE	FALSE	FALSE
CFAP161	ENSG00000156206	4.78781	4.395e-34	FALSE	FALSE	FALSE
SORCS3	ENSG00000156395	5.7808	9.20319e-12	FALSE	FALSE	FALSE
FGF18	ENSG00000156427	6.84399	1.82333e-69	FALSE	FALSE	FALSE
GDF6	ENSG00000156466	-2.20029	2.23496e-05	FALSE	FALSE	FALSE
PPP2R2B	ENSG00000156475	-2.27672	6.35567e-07	FALSE	FALSE	FALSE
HKDC1	ENSG00000156510	2.43647	2.1614e-08	FALSE	FALSE	FALSE
LRFN2	ENSG00000156564	-2.44083	0.00013943	FALSE	FALSE	FALSE
UNC5D	ENSG00000156687	3.36022	8.6918e-06	FALSE	FALSE	FALSE
GLYATL2	ENSG00000156689	7.22508	1.14562e-30	FALSE	FALSE	FALSE
COX6A2	ENSG00000156885	2.30414	0.000382975	FALSE	FALSE	FALSE
B3GNT7	ENSG00000156966	2.1094	2.84261e-08	FALSE	FALSE	FALSE
SST	ENSG00000157005	7.48174	2.11463e-16	FALSE	FALSE	FALSE
ATP2B2	ENSG00000157087	4.30321	9.65316e-20	FALSE	FALSE	FALSE
C8A	ENSG00000157131	5.08098	7.62594e-09	FALSE	FALSE	FALSE
NRG1	ENSG00000157168	-3.26615	3.7685e-11	FALSE	FALSE	FALSE
SUSD3	ENSG00000157303	2.76107	2.74297e-15	FALSE	FALSE	FALSE
C1orf158	ENSG00000157330	9.04688	1.44673e-31	FALSE	FALSE	FALSE
ARSE	ENSG00000157399	5.33754	4.13027e-36	FALSE	FALSE	FALSE
HYDIN	ENSG00000157423	3.0286	1.34957e-12	FALSE	FALSE	FALSE
KCNJ15	ENSG00000157551	-2.1337	2.33061e-06	FALSE	FALSE	FALSE
CREB3L1	ENSG00000157613	2.30576	7.49519e-07	FALSE	FALSE	FALSE
SLC34A2	ENSG00000157765	11.1904	1.77761e-75	FALSE	FALSE	FALSE
DRC1	ENSG00000157856	4.64169	1.01738e-19	FALSE	FALSE	FALSE
CIB4	ENSG00000157884	2.67203	0.000671988	FALSE	FALSE	FALSE
MEGF11	ENSG00000157890	3.40408	7.23245e-15	FALSE	FALSE	FALSE
GRHL3	ENSG00000158055	-4.14184	1.61777e-27	FALSE	FALSE	FALSE
LRRC43	ENSG00000158113	2.57484	1.52653e-13	FALSE	FALSE	FALSE
CLSTN2	ENSG00000158258	2.80186	1.07551e-08	FALSE	FALSE	FALSE
RHBDL2	ENSG00000158315	-2.01861	1.47743e-11	FALSE	FALSE	FALSE
RIBC1	ENSG00000158423	2.48447	7.37929e-24	FALSE	FALSE	FALSE
CATIP	ENSG00000158428	4.67293	1.3979e-35	FALSE	FALSE	FALSE
GDPD5	ENSG00000158555	2.25892	1.12609e-12	FALSE	FALSE	FALSE
PAGE5	ENSG00000158639	-2.95391	0.000153065	FALSE	FALSE	FALSE
ITLN2	ENSG00000158764	2.34091	0.00331824	FALSE	FALSE	FALSE
PLA2G2F	ENSG00000158786	-7.81033	2.49469e-31	FALSE	FALSE	FALSE
EDA	ENSG00000158813	2.15926	1.07198e-09	FALSE	FALSE	FALSE
FGF17	ENSG00000158815	4.19017	1.08173e-16	FALSE	FALSE	FALSE
VWA5B1	ENSG00000158816	-2.28403	0.000308953	FALSE	FALSE	FALSE
DMTN	ENSG00000158856	2.20769	5.02357e-13	FALSE	FALSE	FALSE
APOA2	ENSG00000158874	2.2997	0.00543521	FALSE	FALSE	FALSE
CIART	ENSG00000159208	2.14792	7.40559e-12	FALSE	FALSE	FALSE
ACTC1	ENSG00000159251	-3.56183	7.59914e-09	FALSE	FALSE	FALSE
CLDN14	ENSG00000159261	2.6324	2.0257e-08	FALSE	FALSE	FALSE
PLA2G4D	ENSG00000159337	-4.30376	7.77201e-14	FALSE	FALSE	FALSE
M1AP	ENSG00000159374	3.50783	1.81322e-17	FALSE	TRUE	FALSE
IRX6	ENSG00000159387	3.36109	1.695e-07	FALSE	FALSE	FALSE
CES5A	ENSG00000159398	2.5831	0.00197802	FALSE	FALSE	FALSE
SPRR2G	ENSG00000159516	-7.68965	4.23661e-14	FALSE	FALSE	FALSE
PGLYRP3	ENSG00000159527	-3.77665	1.23022e-06	FALSE	FALSE	FALSE
CCDC17	ENSG00000159588	2.25044	4.27079e-13	FALSE	FALSE	FALSE
ADGRG5	ENSG00000159618	2.00956	7.21071e-07	FALSE	FALSE	FALSE
DRC7	ENSG00000159625	5.67988	3.1045e-35	FALSE	FALSE	FALSE
TEPP	ENSG00000159648	-3.82944	1.76069e-16	FALSE	FALSE	FALSE
UROC1	ENSG00000159650	4.14854	2.46996e-12	FALSE	FALSE	FALSE
LRRC36	ENSG00000159708	2.21482	1.667e-07	FALSE	FALSE	FALSE
TPPP3	ENSG00000159713	2.32705	3.41847e-09	FALSE	FALSE	FALSE
PIP	ENSG00000159763	3.13198	0.000371261	FALSE	FALSE	FALSE
LYPD5	ENSG00000159871	-2.65479	5.14965e-16	FALSE	FALSE	FALSE
CPAMD8	ENSG00000160111	2.01958	4.72697e-07	FALSE	FALSE	FALSE
ANKLE1	ENSG00000160117	2.11208	1.72034e-10	FALSE	TRUE	FALSE
TFF3	ENSG00000160180	8.19119	6.40659e-42	FALSE	FALSE	FALSE
TMPRSS3	ENSG00000160183	3.25953	8.75053e-12	FALSE	FALSE	FALSE
RSPH1	ENSG00000160188	4.51571	1.14678e-31	FALSE	TRUE	FALSE
CRYAA	ENSG00000160202	4.94878	2.39362e-14	FALSE	FALSE	FALSE
FTCD	ENSG00000160282	3.72092	2.24993e-12	FALSE	FALSE	FALSE
FCN2	ENSG00000160339	2.57239	0.0011888	FALSE	FALSE	FALSE
C9orf116	ENSG00000160345	2.28084	1.01419e-17	FALSE	FALSE	FALSE
CFAP157	ENSG00000160401	2.52055	2.97553e-30	FALSE	FALSE	FALSE
TMEM190	ENSG00000160472	4.38711	9.07669e-18	FALSE	FALSE	FALSE
S100A1	ENSG00000160678	5.15476	1.22939e-31	FALSE	FALSE	FALSE
PTH1R	ENSG00000160801	4.37032	7.73663e-27	FALSE	FALSE	FALSE
MYL3	ENSG00000160808	3.42282	2.61542e-10	FALSE	FALSE	FALSE
LRRC71	ENSG00000160838	5.12484	1.42051e-28	FALSE	FALSE	FALSE
FGFR4	ENSG00000160867	3.0835	3.05871e-17	FALSE	FALSE	FALSE
PTGER1	ENSG00000160951	2.12676	7.14932e-06	FALSE	FALSE	FALSE
COL26A1	ENSG00000160963	4.44606	3.77409e-19	FALSE	FALSE	FALSE
SCGB3A1	ENSG00000161055	4.55856	5.16851e-14	FALSE	FALSE	FALSE
FBXO27	ENSG00000161243	-2.25721	5.65439e-10	FALSE	FALSE	FALSE
NPHS1	ENSG00000161270	3.16914	2.60738e-07	FALSE	FALSE	FALSE
CCDC155	ENSG00000161609	2.1154	0.000484526	FALSE	TRUE	FALSE
FAM171A2	ENSG00000161682	2.5956	1.21901e-14	FALSE	FALSE	FALSE
AQP5	ENSG00000161798	7.28791	1.27156e-31	FALSE	FALSE	FALSE
KRT84	ENSG00000161849	-2.63954	0.00165451	FALSE	FALSE	FALSE
ASGR2	ENSG00000161944	2.02375	6.90825e-07	FALSE	FALSE	FALSE
FGF11	ENSG00000161958	-3.44273	4.50231e-18	FALSE	FALSE	FALSE
CCDC78	ENSG00000162004	3.57545	4.99044e-20	FALSE	FALSE	FALSE
MSLNL	ENSG00000162006	5.29806	1.67527e-15	FALSE	FALSE	FALSE
PPP1R32	ENSG00000162148	2.57877	1.99244e-23	FALSE	FALSE	FALSE
ASRGL1	ENSG00000162174	5.25883	2.21271e-52	FALSE	FALSE	FALSE
SLC25A45	ENSG00000162241	2.10192	1.2454e-25	FALSE	FALSE	FALSE
FGF19	ENSG00000162344	3.2769	0.000116421	FALSE	FALSE	FALSE
PDZK1IP1	ENSG00000162366	2.34201	1.74346e-05	FALSE	FALSE	FALSE
BSND	ENSG00000162399	2.19257	0.0010411	FALSE	FALSE	FALSE
PRKAA2	ENSG00000162409	2.39376	4.26868e-10	FALSE	FALSE	FALSE
TMEM82	ENSG00000162460	5.10126	7.596e-12	FALSE	FALSE	FALSE
MATN1	ENSG00000162510	3.10062	6.84448e-15	FALSE	FALSE	FALSE
CAMK2N1	ENSG00000162545	-2.2978	1.61979e-11	FALSE	FALSE	FALSE
ALPL	ENSG00000162551	3.9163	1.56375e-19	FALSE	FALSE	FALSE
TTLL10	ENSG00000162571	3.19805	3.96437e-17	FALSE	FALSE	FALSE
DIRAS3	ENSG00000162595	2.53314	2.17459e-09	FALSE	FALSE	FALSE
C1orf87	ENSG00000162598	3.65595	6.63991e-07	FALSE	FALSE	FALSE
WDR63	ENSG00000162643	2.31046	3.97668e-09	FALSE	FALSE	FALSE
FCRLB	ENSG00000162746	-4.52468	2.60714e-38	FALSE	FALSE	FALSE
SLC9C2	ENSG00000162753	2.95178	2.97763e-07	FALSE	FALSE	FALSE
KLHDC8A	ENSG00000162873	2.3197	3.89217e-07	FALSE	FALSE	FALSE
PM20D1	ENSG00000162877	-8.01069	1.1698e-80	FALSE	FALSE	FALSE
PKDCC	ENSG00000162878	5.07183	4.87366e-37	FALSE	FALSE	FALSE
PIGR	ENSG00000162896	5.30719	1.437e-20	FALSE	FALSE	FALSE
CAPN13	ENSG00000162949	2.77128	3.64613e-07	FALSE	FALSE	FALSE
LRRTM1	ENSG00000162951	8.36039	3.95741e-31	FALSE	FALSE	FALSE
KCNJ3	ENSG00000162989	3.07377	7.2866e-06	FALSE	FALSE	FALSE
NEUROD1	ENSG00000162992	5.93435	1.12682e-10	FALSE	FALSE	FALSE
VSNL1	ENSG00000163032	-2.21987	2.58447e-05	FALSE	FALSE	FALSE
ANKRD30BL	ENSG00000163046	3.53451	1.15293e-05	FALSE	FALSE	FALSE
TEKT4	ENSG00000163060	6.19851	8.94658e-26	FALSE	FALSE	FALSE
EN1	ENSG00000163064	-2.8333	3.03725e-05	FALSE	FALSE	FALSE
CFAP221	ENSG00000163075	6.05986	3.30834e-44	FALSE	FALSE	FALSE
INHBB	ENSG00000163083	2.01613	4.86699e-08	FALSE	FALSE	FALSE
XIRP2	ENSG00000163092	2.64675	0.00972721	FALSE	FALSE	FALSE
NEURL3	ENSG00000163121	2.7474	4.59069e-11	FALSE	FALSE	FALSE
MSX1	ENSG00000163132	7.12216	3.13913e-95	FALSE	FALSE	FALSE
LCE3D	ENSG00000163202	-7.30587	1.41955e-08	FALSE	FALSE	FALSE
IVL	ENSG00000163207	-5.02588	1.64784e-08	FALSE	FALSE	FALSE
SPRR3	ENSG00000163209	-3.62235	0.000510165	TRUE	FALSE	FALSE
SPRR2D	ENSG00000163216	-3.61111	0.000880783	FALSE	FALSE	FALSE
PGLYRP4	ENSG00000163218	-4.05447	4.9391e-11	FALSE	FALSE	FALSE
S100A9	ENSG00000163220	-2.8307	2.34601e-07	FALSE	FALSE	FALSE
S100A12	ENSG00000163221	-3.4052	1.66399e-08	FALSE	FALSE	FALSE
ALPP	ENSG00000163283	4.56789	2.23349e-10	FALSE	FALSE	FALSE
GABRG1	ENSG00000163285	6.10121	3.71621e-14	FALSE	FALSE	FALSE
ALPPL2	ENSG00000163286	9.02425	9.41734e-31	FALSE	FALSE	FALSE
NIPAL1	ENSG00000163293	-2.7526	1.01776e-17	FALSE	FALSE	FALSE
ALPI	ENSG00000163295	7.93908	1.02007e-15	FALSE	FALSE	FALSE
CLDN1	ENSG00000163347	-2.15962	1.24345e-06	FALSE	FALSE	FALSE
CCKAR	ENSG00000163394	2.99919	0.00116082	FALSE	FALSE	FALSE
IGFN1	ENSG00000163395	6.65798	6.5586e-21	FALSE	FALSE	FALSE
PROK2	ENSG00000163421	2.36502	0.000149905	FALSE	FALSE	FALSE
PDCL2	ENSG00000163440	6.56469	1.01004e-12	FALSE	FALSE	FALSE
TMEM169	ENSG00000163449	2.21498	6.74703e-10	FALSE	FALSE	FALSE
ADORA1	ENSG00000163485	2.54525	8.32918e-10	FALSE	FALSE	FALSE
IHH	ENSG00000163501	7.40372	4.19994e-35	FALSE	FALSE	FALSE
DPPA2	ENSG00000163530	3.4425	0.0047255	FALSE	FALSE	FALSE
AIM2	ENSG00000163568	-4.22807	2.18886e-21	FALSE	FALSE	FALSE
EFHB	ENSG00000163576	2.08681	5.15481e-09	FALSE	FALSE	FALSE
SLC2A2	ENSG00000163581	4.11618	3.43134e-07	FALSE	FALSE	FALSE
FABP1	ENSG00000163586	8.59897	2.47597e-25	FALSE	FALSE	FALSE
ALB	ENSG00000163631	3.20114	3.35386e-07	FALSE	FALSE	FALSE
ADAMTS9	ENSG00000163638	2.64225	3.02798e-16	FALSE	FALSE	FALSE
DNASE1L3	ENSG00000163687	-2.0345	2.52247e-05	FALSE	FALSE	FALSE
SLC6A20	ENSG00000163817	5.47046	6.61683e-21	FALSE	FALSE	FALSE
LRRC2	ENSG00000163827	2.27048	3.34089e-07	FALSE	FALSE	FALSE
FBXO40	ENSG00000163833	2.23421	0.00112003	FALSE	FALSE	FALSE
GRIK3	ENSG00000163873	3.10416	2.61972e-07	FALSE	FALSE	FALSE
DNALI1	ENSG00000163879	4.17165	2.11996e-27	FALSE	FALSE	FALSE
CFAP100	ENSG00000163885	4.84613	1.39528e-37	FALSE	FALSE	FALSE
LIPH	ENSG00000163898	-2.48359	2.23765e-07	FALSE	FALSE	FALSE
IGF2BP2-AS1	ENSG00000163915	3.13793	6.4876e-08	FALSE	FALSE	FALSE
S100P	ENSG00000163993	-5.30777	2.85854e-20	FALSE	FALSE	FALSE
CLDN19	ENSG00000164007	5.68813	5.58903e-17	FALSE	FALSE	FALSE
CAMP	ENSG00000164047	3.27584	1.03103e-07	FALSE	FALSE	FALSE
ETNPPL	ENSG00000164089	2.49473	0.000741203	FALSE	FALSE	FALSE
NDST3	ENSG00000164100	-2.17644	3.47058e-05	FALSE	FALSE	FALSE
TMEM155	ENSG00000164112	-3.76407	3.5204e-12	FALSE	FALSE	FALSE
HPGD	ENSG00000164120	-3.5715	1.0236e-12	FALSE	FALSE	FALSE
ASB5	ENSG00000164122	-3.60778	9.87343e-06	FALSE	FALSE	FALSE
NPY5R	ENSG00000164129	-2.83318	2.3974e-05	FALSE	FALSE	FALSE
ITGA2	ENSG00000164171	-2.0421	1.1797e-10	FALSE	FALSE	FALSE
ZNF474	ENSG00000164185	2.63715	4.76435e-12	FALSE	FALSE	FALSE
RNF180	ENSG00000164197	2.19771	2.37102e-09	FALSE	FALSE	FALSE
SCGB3A2	ENSG00000164265	-2.37706	0.00119095	FALSE	FALSE	FALSE
SPINK1	ENSG00000164266	-2.58053	0.000395607	FALSE	FALSE	FALSE
HTR4	ENSG00000164270	3.43853	1.94983e-07	FALSE	FALSE	FALSE
CDC20B	ENSG00000164287	6.29883	3.89331e-21	FALSE	FALSE	FALSE
CMYA5	ENSG00000164309	-2.29399	1.51102e-09	FALSE	FALSE	FALSE
CARTPT	ENSG00000164326	5.73057	8.02529e-09	FALSE	FALSE	FALSE
KLKB1	ENSG00000164344	3.21587	7.81059e-16	FALSE	FALSE	FALSE
CSF2	ENSG00000164400	-2.49838	6.09029e-05	FALSE	FALSE	FALSE
DACT2	ENSG00000164488	4.77058	5.18504e-16	FALSE	FALSE	FALSE
RAET1E	ENSG00000164520	-3.59261	1.92925e-18	FALSE	FALSE	FALSE
HCN1	ENSG00000164588	4.33908	1.54519e-07	FALSE	FALSE	FALSE
KIF6	ENSG00000164627	2.74982	3.6088e-12	FALSE	FALSE	FALSE
SLC29A4	ENSG00000164638	2.44715	4.65989e-10	FALSE	FALSE	FALSE
SP8	ENSG00000164651	3.80721	5.18686e-05	FALSE	FALSE	FALSE
IQUB	ENSG00000164675	2.66836	1.62104e-13	FALSE	FALSE	FALSE
FABP5	ENSG00000164687	-3.09053	6.01342e-19	FALSE	FALSE	FALSE
SHH	ENSG00000164690	-2.77465	1.06478e-07	FALSE	FALSE	FALSE
SOX17	ENSG00000164736	7.37063	1.41271e-162	TRUE	FALSE	FALSE
C7orf57	ENSG00000164746	2.58936	2.13431e-07	FALSE	FALSE	FALSE
SBSPON	ENSG00000164764	2.88558	1.45799e-11	FALSE	FALSE	FALSE
DEFA5	ENSG00000164816	11.0109	3.29498e-15	FALSE	FALSE	FALSE
DEFA6	ENSG00000164822	4.16736	3.10994e-05	FALSE	FALSE	FALSE
DEFB1	ENSG00000164825	2.59295	4.91744e-06	FALSE	FALSE	FALSE
GPER1	ENSG00000164850	2.62463	8.47968e-13	FALSE	FALSE	FALSE
BAALC	ENSG00000164929	-2.01631	6.53909e-06	FALSE	FALSE	FALSE
DCSTAMP	ENSG00000164935	2.07852	8.09308e-05	FALSE	FALSE	FALSE
FREM1	ENSG00000164946	2.42667	9.12867e-07	FALSE	FALSE	FALSE
C9orf24	ENSG00000164972	5.8402	5.83021e-39	FALSE	FALSE	FALSE
NKX6-3	ENSG00000165066	6.78229	7.38301e-17	FALSE	FALSE	FALSE
C8orf34	ENSG00000165084	3.70087	9.55875e-14	FALSE	FALSE	FALSE
ALDH1A1	ENSG00000165092	3.17184	2.00311e-14	FALSE	FALSE	FALSE
PTCHD1	ENSG00000165186	-3.33635	5.17386e-09	FALSE	FALSE	FALSE
RNF183	ENSG00000165188	4.09432	2.3879e-14	FALSE	FALSE	FALSE
ASB11	ENSG00000165192	2.01834	0.00790598	FALSE	FALSE	FALSE
PCDH19	ENSG00000165194	2.30178	4.62438e-07	FALSE	FALSE	FALSE
CLDN3	ENSG00000165215	5.27352	4.46532e-35	FALSE	FALSE	FALSE
NLGN4Y	ENSG00000165246	-8.56799	3.4582e-24	FALSE	FALSE	FALSE
AQP3	ENSG00000165272	-4.44281	1.21893e-27	FALSE	FALSE	FALSE
ARMC3	ENSG00000165309	5.05654	2.77573e-19	FALSE	FALSE	FALSE
DEUP1	ENSG00000165325	2.84864	2.39197e-08	FALSE	FALSE	FALSE
SLC7A3	ENSG00000165349	2.50332	9.52228e-05	FALSE	FALSE	FALSE
CLDN2	ENSG00000165376	4.83993	1.01055e-17	FALSE	FALSE	FALSE
LRRC18	ENSG00000165383	4.26905	5.59308e-16	FALSE	FALSE	FALSE
NA	ENSG00000165388	-3.46832	9.07786e-13	FALSE	FALSE	FALSE
NA	ENSG00000165390	-8.27294	3.86214e-24	FALSE	FALSE	FALSE
TSHR	ENSG00000165409	4.41029	2.21296e-20	FALSE	FALSE	FALSE
PHYHIPL	ENSG00000165443	2.63722	1.42245e-06	FALSE	FALSE	FALSE
PHOX2A	ENSG00000165462	4.61102	3.24236e-09	FALSE	FALSE	FALSE
GJB2	ENSG00000165474	-3.78248	2.75917e-15	FALSE	FALSE	FALSE
NGB	ENSG00000165553	-3.37407	1.32606e-05	FALSE	FALSE	FALSE
ZNF503	ENSG00000165655	2.06984	6.1766e-15	FALSE	FALSE	FALSE
NA	ENSG00000165659	2.19922	9.91806e-07	FALSE	FALSE	FALSE
CLEC1B	ENSG00000165682	-3.64013	1.24865e-11	FALSE	FALSE	FALSE
AK8	ENSG00000165695	2.38701	2.52844e-13	FALSE	FALSE	FALSE
FAM69B	ENSG00000165716	3.50977	7.20163e-33	FALSE	FALSE	FALSE
RET	ENSG00000165731	2.66516	2.73284e-09	FALSE	FALSE	FALSE
SLC39A2	ENSG00000165794	-2.09419	0.000702565	FALSE	FALSE	FALSE
RNASE7	ENSG00000165799	-5.43228	2.06371e-21	FALSE	FALSE	FALSE
HSPA12A	ENSG00000165868	2.62022	2.79553e-16	FALSE	FALSE	FALSE
SERPINA12	ENSG00000165953	-3.19413	0.00010378	FALSE	FALSE	FALSE
NELL1	ENSG00000165973	2.23526	0.00510806	FALSE	FALSE	FALSE
	ENSG00000166104	5.27786	1.9927e-12	FALSE	FALSE	FALSE
ADAMTS15	ENSG00000166106	2.82168	1.78015e-11	FALSE	FALSE	FALSE
LRTM2	ENSG00000166159	5.31345	4.01727e-12	FALSE	FALSE	FALSE
CKB	ENSG00000166165	2.82781	6.21599e-13	FALSE	FALSE	FALSE
TBATA	ENSG00000166220	3.99728	4.61072e-07	FALSE	FALSE	FALSE
C16orf71	ENSG00000166246	2.67953	2.69737e-25	FALSE	FALSE	FALSE
TMEM100	ENSG00000166292	2.70279	1.4528e-07	FALSE	FALSE	FALSE
NETO1	ENSG00000166342	-3.53869	2.42478e-08	FALSE	FALSE	FALSE
SERPINB7	ENSG00000166396	-3.03547	5.13719e-05	FALSE	FALSE	FALSE
LMO1	ENSG00000166407	3.56286	7.1854e-09	FALSE	FALSE	FALSE
WDR72	ENSG00000166415	-2.32589	0.000118198	FALSE	FALSE	FALSE
CRABP1	ENSG00000166426	5.21427	1.01127e-12	FALSE	FALSE	FALSE
PKD1L2	ENSG00000166473	2.1137	8.54925e-06	FALSE	FALSE	FALSE
CLEC4E	ENSG00000166523	2.25291	1.07957e-06	FALSE	FALSE	FALSE
CLEC4D	ENSG00000166527	2.03133	0.000136421	FALSE	FALSE	FALSE
RIMKLB	ENSG00000166532	2.3671	1.57892e-15	FALSE	FALSE	FALSE
A2ML1	ENSG00000166535	-2.89448	3.39345e-06	FALSE	FALSE	FALSE
SLC38A8	ENSG00000166558	6.29626	7.76229e-16	FALSE	FALSE	FALSE
GALR1	ENSG00000166573	4.26286	5.47313e-07	FALSE	FALSE	FALSE
IQCD	ENSG00000166578	2.10158	3.57277e-15	FALSE	FALSE	FALSE
CDH16	ENSG00000166589	8.12925	6.02274e-38	FALSE	FALSE	FALSE
CFAP52	ENSG00000166596	3.53169	1.37472e-21	FALSE	FALSE	FALSE
SERPINB12	ENSG00000166634	-4.43584	1.96791e-06	FALSE	FALSE	FALSE
HTR3A	ENSG00000166736	7.19335	5.26343e-29	FALSE	FALSE	FALSE
ZNF667-AS1	ENSG00000166770	2.68524	9.78209e-13	FALSE	FALSE	FALSE
MESP1	ENSG00000166823	2.88079	1.50407e-14	FALSE	FALSE	FALSE
ANPEP	ENSG00000166825	4.31678	1.97203e-21	FALSE	FALSE	FALSE
GLYATL1	ENSG00000166840	3.10063	7.58855e-09	FALSE	FALSE	FALSE
CACNG2	ENSG00000166862	-2.79602	0.00137357	FALSE	FALSE	FALSE
TAC3	ENSG00000166863	-3.9804	6.64191e-11	FALSE	FALSE	FALSE
MYO1A	ENSG00000166866	3.17682	1.96683e-13	FALSE	FALSE	FALSE
CHP2	ENSG00000166869	-4.11078	2.38579e-08	FALSE	FALSE	FALSE
C15orf48	ENSG00000166920	-2.2588	2.56926e-07	FALSE	FALSE	FALSE
GREM1	ENSG00000166923	-2.60561	4.66891e-06	FALSE	FALSE	FALSE
MS4A8	ENSG00000166959	5.38059	1.75891e-11	FALSE	FALSE	FALSE
B4GALNT2	ENSG00000167080	-2.60011	0.000741705	FALSE	FALSE	FALSE
TTC16	ENSG00000167094	3.92398	1.20249e-24	FALSE	FALSE	FALSE
LINC00483	ENSG00000167117	4.06825	9.6377e-09	FALSE	FALSE	FALSE
PRRX2	ENSG00000167157	2.95724	6.90213e-12	FALSE	FALSE	FALSE
ISLR2	ENSG00000167178	2.64921	2.34752e-10	FALSE	FALSE	FALSE
PRR15L	ENSG00000167183	2.60836	2.584e-09	FALSE	FALSE	FALSE
LOXHD1	ENSG00000167210	2.24231	9.70007e-07	FALSE	FALSE	FALSE
ART5	ENSG00000167311	2.3425	3.47879e-06	FALSE	FALSE	FALSE
GNG8	ENSG00000167414	2.00468	9.70206e-05	FALSE	FALSE	FALSE
LPO	ENSG00000167419	2.67835	1.41817e-07	FALSE	FALSE	FALSE
JSRP1	ENSG00000167476	4.45246	5.19887e-24	FALSE	FALSE	FALSE
AQP2	ENSG00000167580	5.60702	1.72295e-15	FALSE	FALSE	FALSE
GPD1	ENSG00000167588	3.35495	3.25757e-14	FALSE	FALSE	FALSE
CDC42EP5	ENSG00000167617	-2.41699	5.33183e-14	FALSE	FALSE	FALSE
DNAAF3	ENSG00000167646	3.2455	4.22731e-16	FALSE	FALSE	FALSE
PSCA	ENSG00000167653	-6.94635	1.74713e-27	FALSE	FALSE	FALSE
LY6D	ENSG00000167656	-5.82574	7.96567e-13	FALSE	FALSE	FALSE
GPT	ENSG00000167701	2.84287	3.045e-13	FALSE	FALSE	FALSE
KLK4	ENSG00000167749	4.48847	4.12117e-09	FALSE	FALSE	FALSE
KRT80	ENSG00000167767	-2.10334	3.77678e-06	FALSE	FALSE	FALSE
KRT1	ENSG00000167768	-10.7746	1.67817e-60	FALSE	FALSE	FALSE
SOAT2	ENSG00000167780	3.23164	3.96612e-08	FALSE	FALSE	FALSE
C3P1	ENSG00000167798	6.10614	5.48433e-14	FALSE	FALSE	FALSE
TBX10	ENSG00000167800	2.62245	4.78628e-05	FALSE	FALSE	FALSE
TEKT1	ENSG00000167858	6.98312	7.16055e-36	FALSE	FALSE	FALSE
EVPL	ENSG00000167880	-2.01092	1.4451e-07	FALSE	FALSE	FALSE
GSDMA	ENSG00000167914	-2.09861	3.71535e-06	FALSE	FALSE	FALSE
SOST	ENSG00000167941	-6.96827	1.7484e-21	FALSE	FALSE	FALSE
CASKIN1	ENSG00000167971	2.02686	1.02271e-06	FALSE	FALSE	FALSE
HRASLS5	ENSG00000168004	2.00438	0.000220465	FALSE	FALSE	FALSE
SLC22A11	ENSG00000168065	-2.34245	9.50854e-05	FALSE	FALSE	FALSE
PNOC	ENSG00000168081	3.81777	1.06094e-12	FALSE	FALSE	FALSE
KCNJ4	ENSG00000168135	3.35306	1.04517e-07	FALSE	FALSE	FALSE
VASN	ENSG00000168140	2.83753	2.27644e-28	FALSE	FALSE	FALSE
FAM83B	ENSG00000168143	-2.53616	1.6577e-05	FALSE	FALSE	FALSE
GLYCTK	ENSG00000168237	2.47056	2.08916e-23	FALSE	FALSE	FALSE
NA	ENSG00000168242	4.41988	1.55367e-15	FALSE	FALSE	FALSE
NA	ENSG00000168274	2.08892	6.69321e-07	FALSE	FALSE	FALSE
HIST1H1E	ENSG00000168298	2.90912	1.25723e-09	FALSE	FALSE	FALSE
ACOX2	ENSG00000168306	2.22144	4.20101e-10	FALSE	FALSE	FALSE
FAM107A	ENSG00000168309	5.09189	1.36406e-36	FALSE	FALSE	FALSE
KLHL30	ENSG00000168427	2.91257	4.57691e-11	FALSE	FALSE	FALSE
SFTPC	ENSG00000168484	-2.26604	0.00367193	FALSE	FALSE	FALSE
SCGB1D1	ENSG00000168515	10.6945	1.3669e-18	FALSE	FALSE	FALSE
CHRM1	ENSG00000168539	2.72914	4.42102e-05	FALSE	FALSE	FALSE
GFRA2	ENSG00000168546	2.67605	6.62014e-09	FALSE	FALSE	FALSE
DYNLRB2	ENSG00000168589	2.29181	1.9072e-08	FALSE	FALSE	FALSE
AXIN2	ENSG00000168646	2.19974	4.57691e-11	TRUE	FALSE	FALSE
VWA3B	ENSG00000168658	5.19461	7.30274e-32	FALSE	FALSE	FALSE
WFDC12	ENSG00000168703	-2.97391	0.000259498	FALSE	FALSE	FALSE
STX18	ENSG00000168818	2.86552	9.94016e-78	FALSE	FALSE	FALSE
SOX14	ENSG00000168875	4.03813	0.00225043	FALSE	FALSE	FALSE
SFTPB	ENSG00000168878	3.59111	2.69753e-08	FALSE	FALSE	FALSE
BTNL3	ENSG00000168903	3.2677	2.42414e-05	FALSE	FALSE	FALSE
SPRY3	ENSG00000168939	2.0542	2.47834e-21	FALSE	FALSE	FALSE
STXBP6	ENSG00000168952	4.69494	8.57158e-24	FALSE	FALSE	FALSE
TM4SF20	ENSG00000168955	8.08301	1.81196e-29	FALSE	FALSE	FALSE
COL4A3	ENSG00000169031	4.12596	1.36739e-22	FALSE	FALSE	FALSE
ZBBX	ENSG00000169064	4.8182	2.78356e-13	FALSE	FALSE	FALSE
FAM110B	ENSG00000169122	2.16413	1.60808e-10	FALSE	FALSE	FALSE
ARMC4	ENSG00000169126	2.02017	0.000126823	FALSE	FALSE	FALSE
SH3TC2	ENSG00000169247	-3.68959	5.04486e-22	FALSE	FALSE	FALSE
	ENSG00000169253	4.27669	9.36293e-24	FALSE	FALSE	FALSE
STK32A	ENSG00000169302	-2.70585	7.83213e-08	FALSE	FALSE	FALSE
C22orf15	ENSG00000169314	5.06049	2.22426e-42	FALSE	FALSE	FALSE
GP2	ENSG00000169347	7.02225	1.15223e-12	FALSE	FALSE	FALSE
NPR1	ENSG00000169418	3.14091	1.40778e-24	FALSE	FALSE	FALSE
SPRR1B	ENSG00000169469	-4.25099	3.05489e-05	FALSE	FALSE	FALSE
SPRR1A	ENSG00000169474	-4.91234	1.601e-07	FALSE	FALSE	FALSE
CRCT1	ENSG00000169509	-4.84362	1.28736e-05	FALSE	FALSE	FALSE
CCDC8	ENSG00000169515	2.32097	5.28828e-09	FALSE	FALSE	FALSE
GJB1	ENSG00000169562	7.92927	3.06797e-52	FALSE	FALSE	FALSE
BNC1	ENSG00000169594	-3.32883	6.32858e-08	FALSE	FALSE	FALSE
GKN1	ENSG00000169605	-5.32981	4.08024e-08	FALSE	FALSE	FALSE
LINGO1	ENSG00000169783	2.6597	1.57692e-11	FALSE	FALSE	FALSE
GSX1	ENSG00000169840	2.82368	0.0074576	FALSE	FALSE	FALSE
CTNND2	ENSG00000169862	2.7228	4.64019e-06	FALSE	FALSE	FALSE
MUC17	ENSG00000169876	6.1618	2.21489e-12	FALSE	FALSE	FALSE
TM4SF4	ENSG00000169903	6.0206	1.19866e-19	FALSE	FALSE	FALSE
MYO7B	ENSG00000169994	3.81342	1.55367e-15	FALSE	FALSE	FALSE
TMEM154	ENSG00000170006	-3.12579	1.12594e-25	FALSE	FALSE	FALSE
MYRIP	ENSG00000170011	3.3827	8.01742e-16	FALSE	FALSE	FALSE
ZPLD1	ENSG00000170044	2.52675	0.000325158	FALSE	FALSE	FALSE
GPR37L1	ENSG00000170075	2.13394	8.27354e-09	FALSE	FALSE	FALSE
NSG2	ENSG00000170091	-2.83375	1.74613e-07	FALSE	FALSE	FALSE
SERPINA6	ENSG00000170099	5.66537	1.05786e-14	FALSE	FALSE	FALSE
RNF150	ENSG00000170153	2.20476	3.67714e-08	FALSE	FALSE	FALSE
ADRA1B	ENSG00000170214	5.02176	1.3023e-28	FALSE	FALSE	FALSE
FABP4	ENSG00000170323	-5.07692	2.91552e-17	FALSE	FALSE	FALSE
CST2	ENSG00000170369	2.00704	0.00290503	FALSE	FALSE	FALSE
EMX2	ENSG00000170370	4.57609	1.97377e-21	FALSE	FALSE	FALSE
CST1	ENSG00000170373	2.8428	0.000316207	FALSE	FALSE	FALSE
TCAF2	ENSG00000170379	-3.02581	1.04983e-27	FALSE	FALSE	FALSE
LRRN2	ENSG00000170382	4.82609	5.3623e-35	FALSE	FALSE	FALSE
KRT78	ENSG00000170423	-2.0991	0.00211247	FALSE	FALSE	FALSE
ADORA2B	ENSG00000170425	-2.51074	4.60041e-14	FALSE	FALSE	FALSE
SDR9C7	ENSG00000170426	-5.48987	1.14999e-21	FALSE	FALSE	FALSE
KRT75	ENSG00000170454	-2.47518	0.00359317	FALSE	FALSE	FALSE
KRT6C	ENSG00000170465	-5.13887	9.38686e-10	FALSE	FALSE	FALSE
MZB1	ENSG00000170476	3.03364	9.86582e-10	FALSE	FALSE	FALSE
KRT4	ENSG00000170477	-5.48261	2.24535e-10	FALSE	FALSE	FALSE
SLC23A1	ENSG00000170482	3.30755	6.3851e-17	FALSE	FALSE	FALSE
LONRF2	ENSG00000170500	2.19622	2.959e-06	FALSE	FALSE	FALSE
TMC7	ENSG00000170537	-2.82605	1.38803e-26	FALSE	FALSE	FALSE
IRX1	ENSG00000170549	7.10042	1.06902e-18	FALSE	FALSE	FALSE
SIX2	ENSG00000170577	-2.15468	7.70469e-05	FALSE	FALSE	FALSE
DLGAP1	ENSG00000170579	2.66182	1.9036e-07	FALSE	FALSE	FALSE
NA	ENSG00000170616	-3.05975	1.45025e-08	FALSE	FALSE	FALSE
GTSF1	ENSG00000170627	-2.47195	0.000128979	FALSE	FALSE	FALSE
HOXB9	ENSG00000170689	2.95135	2.22248e-07	FALSE	FALSE	FALSE
TTLL6	ENSG00000170703	3.50427	1.71577e-11	FALSE	FALSE	FALSE
SYT9	ENSG00000170743	-2.29784	0.000173584	FALSE	FALSE	FALSE
SDR16C5	ENSG00000170786	-3.1937	1.80359e-06	FALSE	FALSE	FALSE
BFSP2	ENSG00000170819	2.70822	2.73875e-07	FALSE	FALSE	FALSE
TRH	ENSG00000170893	5.38614	4.82838e-14	FALSE	FALSE	FALSE
PKHD1	ENSG00000170927	2.77778	2.91692e-06	FALSE	FALSE	FALSE
DCDC1	ENSG00000170959	2.46838	3.41902e-08	FALSE	FALSE	FALSE
HAS2	ENSG00000170961	-2.78762	2.88644e-09	FALSE	FALSE	FALSE
PKIA	ENSG00000171033	-2.6954	1.54422e-10	FALSE	FALSE	FALSE
ALK	ENSG00000171094	4.06084	2.45994e-16	TRUE	FALSE	FALSE
OBP2B	ENSG00000171102	9.89949	6.06739e-33	FALSE	FALSE	FALSE
NRTN	ENSG00000171119	2.81128	2.98306e-12	FALSE	FALSE	FALSE
KCNG3	ENSG00000171126	3.24181	9.59231e-08	FALSE	FALSE	FALSE
MUC7	ENSG00000171195	4.94153	1.4553e-05	FALSE	FALSE	FALSE
OPRPN	ENSG00000171199	4.37913	0.000467971	FALSE	FALSE	FALSE
UGT2B7	ENSG00000171234	3.4369	8.2504e-08	FALSE	FALSE	FALSE
SOSTDC1	ENSG00000171243	2.44543	0.000145848	FALSE	FALSE	FALSE
KRT15	ENSG00000171346	-6.3977	1.14691e-27	FALSE	FALSE	FALSE
KRT13	ENSG00000171401	-7.41599	5.21565e-20	FALSE	FALSE	FALSE
KRT20	ENSG00000171431	-4.42676	1.02303e-06	FALSE	FALSE	FALSE
HOPX	ENSG00000171476	-2.90057	5.00835e-14	FALSE	FALSE	FALSE
RXFP1	ENSG00000171509	5.5265	2.60714e-38	FALSE	FALSE	FALSE
PTGER4	ENSG00000171522	-2.1558	1.18699e-13	FALSE	FALSE	FALSE
NEUROD2	ENSG00000171532	2.27133	0.000446696	FALSE	FALSE	FALSE
ECEL1	ENSG00000171551	3.6097	1.27192e-08	FALSE	FALSE	FALSE
FGG	ENSG00000171557	5.08847	2.10532e-07	FALSE	FALSE	FALSE
FGA	ENSG00000171560	6.9879	2.26433e-13	FALSE	FALSE	FALSE
FGB	ENSG00000171564	6.27949	8.9246e-11	FALSE	FALSE	FALSE
DNAI2	ENSG00000171595	4.04184	7.2951e-14	FALSE	FALSE	FALSE
S100Z	ENSG00000171643	2.10166	1.20014e-06	FALSE	FALSE	FALSE
NMRAL2P	ENSG00000171658	-2.40463	9.70684e-06	FALSE	FALSE	FALSE
DEFB4A	ENSG00000171711	3.59687	0.000487433	FALSE	FALSE	FALSE
PAH	ENSG00000171759	2.05522	0.00282704	FALSE	FALSE	FALSE
KNDC1	ENSG00000171798	3.95528	5.08555e-14	FALSE	FALSE	FALSE
CFAP46	ENSG00000171811	4.44168	1.01419e-17	FALSE	FALSE	FALSE
ANGPTL7	ENSG00000171819	4.57898	1.64205e-11	FALSE	FALSE	FALSE
PRNP	ENSG00000171867	-2.25302	2.33949e-25	FALSE	FALSE	FALSE
AQP4	ENSG00000171885	2.97237	1.05589e-06	FALSE	FALSE	FALSE
CYP4F22	ENSG00000171954	-5.65829	2.48071e-27	FALSE	FALSE	FALSE
DRC3	ENSG00000171962	2.16446	4.68803e-18	FALSE	FALSE	FALSE
REG3A	ENSG00000172016	7.78504	1.47059e-11	FALSE	FALSE	FALSE
CCL11	ENSG00000172156	-2.38359	8.12028e-05	FALSE	FALSE	FALSE
SNTB1	ENSG00000172164	2.9606	3.5525e-25	FALSE	FALSE	FALSE
ISG20	ENSG00000172183	2.00739	2.13756e-13	FALSE	FALSE	FALSE
GPR22	ENSG00000172209	3.07346	8.84194e-11	FALSE	FALSE	FALSE
AZU1	ENSG00000172232	3.24854	2.19814e-07	FALSE	FALSE	FALSE
ATOH1	ENSG00000172238	3.03719	0.00933048	FALSE	FALSE	FALSE
C1QTNF4	ENSG00000172247	3.34866	1.03274e-15	FALSE	FALSE	FALSE
B3GALT1	ENSG00000172318	2.28817	4.12579e-05	FALSE	FALSE	FALSE
CLEC12A	ENSG00000172322	-4.31164	2.729e-24	FALSE	FALSE	FALSE
ARNT2	ENSG00000172379	2.01148	1.3933e-06	FALSE	FALSE	FALSE
RSPH9	ENSG00000172426	2.17901	9.34295e-19	FALSE	FALSE	FALSE
AGXT	ENSG00000172482	3.55538	1.22369e-07	FALSE	FALSE	FALSE
CARNS1	ENSG00000172508	2.03526	7.11245e-10	FALSE	FALSE	FALSE
NIPAL4	ENSG00000172548	-5.88757	4.21066e-33	FALSE	FALSE	FALSE
MUCL1	ENSG00000172551	2.42162	0.00698162	FALSE	FALSE	FALSE
PDE3A	ENSG00000172572	2.37995	5.58158e-11	FALSE	FALSE	FALSE
COL6A5	ENSG00000172752	-2.81906	2.05054e-05	FALSE	FALSE	FALSE
EFCAB12	ENSG00000172771	5.22205	3.01277e-39	FALSE	FALSE	FALSE
FADS6	ENSG00000172782	-2.65176	0.000124114	FALSE	FALSE	FALSE
CES3	ENSG00000172828	3.81159	8.69237e-18	FALSE	FALSE	FALSE
KRT2	ENSG00000172867	-5.77158	1.71383e-20	FALSE	FALSE	FALSE
RXFP4	ENSG00000173080	3.33952	2.1638e-11	FALSE	FALSE	FALSE
ADAMTS20	ENSG00000173157	-2.44425	0.00204211	FALSE	FALSE	FALSE
ADCY5	ENSG00000173175	2.60667	6.08345e-11	FALSE	FALSE	FALSE
ABLIM3	ENSG00000173210	-3.58495	1.02257e-23	FALSE	FALSE	FALSE
MAB21L3	ENSG00000173212	-2.64563	1.15532e-06	FALSE	FALSE	FALSE
SNCG	ENSG00000173267	-4.45714	1.06355e-21	FALSE	FALSE	FALSE
MMRN2	ENSG00000173269	-2.40304	2.20351e-18	FALSE	FALSE	FALSE
TMEM196	ENSG00000173452	-2.98402	0.00379064	FALSE	FALSE	FALSE
C2orf70	ENSG00000173557	2.14023	3.0347e-05	FALSE	FALSE	FALSE
TAS1R1	ENSG00000173662	4.46062	6.11762e-21	FALSE	FALSE	FALSE
ADGRG2	ENSG00000173698	2.53191	7.20594e-07	FALSE	FALSE	FALSE
MUC13	ENSG00000173702	6.12265	1.00001e-21	FALSE	FALSE	FALSE
WFIKKN2	ENSG00000173714	3.41631	6.47872e-08	FALSE	FALSE	FALSE
KCNH6	ENSG00000173826	2.48315	1.06904e-05	FALSE	FALSE	FALSE
2018-03-10	ENSG00000173838	2.78231	5.60112e-08	FALSE	FALSE	FALSE
NET1	ENSG00000173848	-2.06242	2.87053e-17	FALSE	FALSE	FALSE
PHOSPHO1	ENSG00000173868	2.67192	8.49933e-13	FALSE	FALSE	FALSE
PIFO	ENSG00000173947	2.74489	4.01727e-12	FALSE	FALSE	FALSE
GSTA3	ENSG00000174156	2.94028	0.000799555	FALSE	FALSE	FALSE
SNX31	ENSG00000174226	-8.17952	3.65878e-56	FALSE	FALSE	FALSE
CHRNA9	ENSG00000174343	2.89918	7.67309e-06	FALSE	FALSE	FALSE
SLC6A19	ENSG00000174358	4.4767	3.15223e-07	FALSE	FALSE	FALSE
GALNTL6	ENSG00000174473	-2.32026	5.91642e-05	FALSE	FALSE	FALSE
GCSAM	ENSG00000174500	-2.06707	7.72782e-10	FALSE	FALSE	FALSE
TTC9B	ENSG00000174521	-2.79981	8.78503e-15	FALSE	FALSE	FALSE
IL20RB	ENSG00000174564	-2.87749	7.26232e-11	FALSE	FALSE	FALSE
NPAS4	ENSG00000174576	-5.41916	7.58238e-24	FALSE	FALSE	FALSE
UGT8	ENSG00000174607	2.2338	1.03794e-06	FALSE	FALSE	FALSE
WDR49	ENSG00000174776	3.37032	3.75428e-11	FALSE	FALSE	FALSE
PCP2	ENSG00000174788	2.04982	3.93772e-08	FALSE	FALSE	FALSE
PDZK1	ENSG00000174827	4.29923	3.31303e-24	FALSE	FALSE	FALSE
DNAH12	ENSG00000174844	3.20594	8.27867e-14	FALSE	FALSE	FALSE
PQLC2L	ENSG00000174899	2.55746	3.15577e-06	FALSE	FALSE	FALSE
CD164L2	ENSG00000174950	2.15592	7.39889e-05	FALSE	FALSE	FALSE
	ENSG00000174977	-2.46599	7.14388e-46	FALSE	FALSE	FALSE
DES	ENSG00000175084	-2.2178	0.00095464	FALSE	FALSE	FALSE
RAG2	ENSG00000175097	-2.79775	5.62566e-05	FALSE	FALSE	FALSE
WFDC5	ENSG00000175121	-5.79258	7.87916e-13	FALSE	FALSE	FALSE
GAL3ST3	ENSG00000175229	4.10469	1.50804e-10	FALSE	FALSE	FALSE
CHST1	ENSG00000175264	3.14187	1.54756e-16	FALSE	FALSE	FALSE
VWA3A	ENSG00000175267	6.05231	2.43414e-35	FALSE	FALSE	FALSE
PHYHD1	ENSG00000175287	3.46729	8.94409e-17	FALSE	FALSE	FALSE
CATSPER1	ENSG00000175294	-2.86233	3.5222e-14	FALSE	FALSE	FALSE
ANKS4B	ENSG00000175311	6.52387	8.21344e-24	FALSE	FALSE	FALSE
ISX	ENSG00000175329	4.42709	4.04612e-07	FALSE	FALSE	FALSE
APOF	ENSG00000175336	2.24753	5.72597e-05	FALSE	FALSE	FALSE
UBQLNL	ENSG00000175518	2.43404	6.91235e-13	FALSE	FALSE	FALSE
PNLIP	ENSG00000175535	3.39835	0.00423613	FALSE	FALSE	FALSE
RWDD4P2	ENSG00000175741	-2.48113	6.55532e-35	FALSE	FALSE	FALSE
SFN	ENSG00000175793	-2.13745	4.25155e-06	FALSE	FALSE	FALSE
CALCB	ENSG00000175868	5.57222	1.87286e-23	FALSE	FALSE	FALSE
DENND2C	ENSG00000175984	-2.39863	5.41566e-16	FALSE	FALSE	FALSE
C11orf16	ENSG00000176029	4.91909	5.07656e-25	FALSE	FALSE	FALSE
KCNE5	ENSG00000176076	2.24802	6.15086e-05	FALSE	FALSE	FALSE
CRYBG2	ENSG00000176092	-2.35332	1.12613e-11	FALSE	FALSE	FALSE
GPX2	ENSG00000176153	-2.28996	1.51599e-05	FALSE	FALSE	FALSE
FOXG1	ENSG00000176165	4.66438	8.8904e-08	FALSE	FALSE	FALSE
CIDEA	ENSG00000176194	-4.84774	3.07245e-09	FALSE	FALSE	FALSE
NA	ENSG00000176395	2.38649	0.000951154	FALSE	FALSE	FALSE
VPS37D	ENSG00000176428	2.00614	6.82848e-13	FALSE	FALSE	FALSE
DCAF4L2	ENSG00000176566	3.47274	0.00954483	FALSE	FALSE	FALSE
MAP3K19	ENSG00000176601	4.00091	1.49089e-17	FALSE	FALSE	FALSE
C20orf197	ENSG00000176659	-2.10539	3.76309e-06	FALSE	FALSE	FALSE
FOXL1	ENSG00000176678	-2.03353	5.63488e-06	FALSE	FALSE	FALSE
FOXC2	ENSG00000176692	-3.05736	3.33332e-10	FALSE	FALSE	FALSE
TTTY14	ENSG00000176728	-6.6357	4.82893e-15	FALSE	FALSE	FALSE
NA	ENSG00000176824	2.06812	0.000447316	FALSE	FALSE	FALSE
FUT2	ENSG00000176920	2.34661	6.60347e-11	FALSE	FALSE	FALSE
GCNT4	ENSG00000176928	-3.3925	1.27919e-18	FALSE	FALSE	FALSE
ACER2	ENSG00000177076	-5.19013	5.85169e-73	FALSE	FALSE	FALSE
DSCAML1	ENSG00000177103	2.89689	3.94601e-09	FALSE	FALSE	FALSE
NUDT4B	ENSG00000177144	-2.34045	1.09674e-13	FALSE	FALSE	FALSE
TRIM72	ENSG00000177238	2.94148	0.000184731	FALSE	FALSE	FALSE
FZD8	ENSG00000177283	3.28502	6.06354e-23	FALSE	FALSE	FALSE
KCNA2	ENSG00000177301	2.7735	1.04647e-06	FALSE	FALSE	FALSE
C10orf71	ENSG00000177354	5.53278	5.31458e-08	FALSE	FALSE	FALSE
UMODL1	ENSG00000177398	4.0048	4.02386e-13	FALSE	FALSE	FALSE
ST8SIA3	ENSG00000177511	-3.11318	0.000411118	FALSE	FALSE	FALSE
NHLH2	ENSG00000177551	-2.43094	0.000944324	FALSE	FALSE	FALSE
C12orf54	ENSG00000177627	-2.57224	1.30148e-09	FALSE	FALSE	FALSE
SRRM3	ENSG00000177679	-2.40561	1.65874e-08	FALSE	FALSE	FALSE
FAM20C	ENSG00000177706	2.17045	1.29387e-13	FALSE	FALSE	FALSE
KCNJ10	ENSG00000177807	2.02392	7.0958e-06	FALSE	FALSE	FALSE
C2orf73	ENSG00000177994	3.28434	2.25277e-11	FALSE	FALSE	FALSE
GPR150	ENSG00000178015	-2.32419	1.00076e-07	FALSE	FALSE	FALSE
LRRC75B	ENSG00000178026	2.41916	4.00281e-14	FALSE	FALSE	FALSE
ADAMTSL1	ENSG00000178031	2.26573	3.70267e-08	FALSE	FALSE	FALSE
PPP1R42	ENSG00000178125	3.26712	2.36035e-11	FALSE	FALSE	FALSE
RNF212	ENSG00000178222	3.29657	3.58252e-10	FALSE	TRUE	FALSE
TMEM151B	ENSG00000178233	-2.15576	5.54143e-06	FALSE	FALSE	FALSE
SLITRK1	ENSG00000178235	-6.01413	1.78893e-13	FALSE	FALSE	FALSE
SHISA3	ENSG00000178343	2.16709	0.00150169	FALSE	FALSE	FALSE
CALML3	ENSG00000178363	-4.40406	4.36727e-08	FALSE	FALSE	FALSE
CALML5	ENSG00000178372	-4.15389	1.7124e-06	FALSE	FALSE	FALSE
DNAJC22	ENSG00000178401	3.66806	5.3031e-22	FALSE	FALSE	FALSE
CEP295NL	ENSG00000178404	2.57672	4.64526e-09	FALSE	FALSE	FALSE
GLDC	ENSG00000178445	2.45512	2.1794e-06	FALSE	FALSE	FALSE
TUBAL3	ENSG00000178462	-2.28626	0.000153959	FALSE	FALSE	FALSE
UCN3	ENSG00000178473	4.25043	3.91079e-06	FALSE	FALSE	FALSE
CTXN1	ENSG00000178531	2.69005	2.12781e-12	FALSE	FALSE	FALSE
CA8	ENSG00000178538	4.99624	1.1566e-21	FALSE	FALSE	FALSE
ERBB4	ENSG00000178568	4.08168	2.14504e-13	FALSE	FALSE	FALSE
PSAPL1	ENSG00000178597	-2.73312	0.00236976	FALSE	FALSE	FALSE
OTOS	ENSG00000178602	5.05028	9.86039e-08	FALSE	FALSE	FALSE
GPR35	ENSG00000178623	3.78396	9.9737e-30	FALSE	FALSE	FALSE
THBD	ENSG00000178726	-3.11598	3.53447e-22	FALSE	FALSE	FALSE
STX19	ENSG00000178750	2.01106	6.04713e-07	FALSE	FALSE	FALSE
ERFE	ENSG00000178752	3.461	1.45194e-17	FALSE	FALSE	FALSE
C5orf46	ENSG00000178776	-3.28253	4.61799e-07	FALSE	FALSE	FALSE
RNF186	ENSG00000178828	2.074	0.00471274	FALSE	FALSE	FALSE
FOXE1	ENSG00000178919	-2.30801	0.00123694	FALSE	FALSE	FALSE
LGALS7B	ENSG00000178934	-3.62549	3.98677e-08	FALSE	FALSE	FALSE
ERICH3	ENSG00000178965	4.44143	1.17985e-12	FALSE	FALSE	FALSE
C9orf50	ENSG00000179058	2.35538	3.49577e-09	FALSE	FALSE	FALSE
	ENSG00000179066	2.71845	1.66671e-06	FALSE	FALSE	FALSE
FAM133A	ENSG00000179083	-2.89756	9.98939e-05	FALSE	FALSE	FALSE
ALOXE3	ENSG00000179148	-3.24525	1.52738e-10	FALSE	FALSE	FALSE
TMEM125	ENSG00000179178	2.47577	2.81992e-10	FALSE	FALSE	FALSE
GPC5	ENSG00000179399	3.48992	1.95943e-08	FALSE	FALSE	FALSE
ALOX12B	ENSG00000179477	-3.49071	3.86785e-12	FALSE	FALSE	FALSE
SLC17A8	ENSG00000179520	4.09456	1.13021e-08	FALSE	FALSE	FALSE
GRM8	ENSG00000179603	2.38171	5.51656e-07	FALSE	FALSE	FALSE
ARL14	ENSG00000179674	-3.11417	4.89448e-06	FALSE	FALSE	FALSE
FOXS1	ENSG00000179772	2.21298	7.60939e-11	FALSE	FALSE	FALSE
LRRC3B	ENSG00000179796	5.22244	2.36482e-17	FALSE	FALSE	FALSE
FAM216B	ENSG00000179813	8.08608	3.46319e-28	FALSE	FALSE	FALSE
MRGPRX3	ENSG00000179826	-3.25216	6.1025e-05	FALSE	FALSE	FALSE
PIK3CD-AS1	ENSG00000179840	2.35705	6.79791e-06	FALSE	FALSE	FALSE
CITED4	ENSG00000179862	2.75455	1.88652e-15	FALSE	FALSE	FALSE
C1orf194	ENSG00000179902	7.89703	8.44218e-54	FALSE	FALSE	FALSE
GPBAR1	ENSG00000179921	2.12144	1.08944e-09	FALSE	FALSE	FALSE
TH	ENSG00000180176	-3.73869	1.62372e-09	FALSE	FALSE	TRUE
F2	ENSG00000180210	4.242	1.00192e-11	FALSE	FALSE	FALSE
	ENSG00000180211	2.41369	1.24443e-18	FALSE	FALSE	FALSE
PLD5	ENSG00000180287	2.19985	0.00166575	FALSE	FALSE	FALSE
PNPLA1	ENSG00000180316	-4.10921	2.92375e-19	FALSE	FALSE	FALSE
KCTD4	ENSG00000180332	2.12445	0.000838809	FALSE	FALSE	FALSE
CCDC129	ENSG00000180347	7.22851	1.65221e-25	FALSE	FALSE	FALSE
ATP5F1EP2	ENSG00000180389	3.1154	3.43088e-32	FALSE	FALSE	FALSE
CYP8B1	ENSG00000180432	2.43225	3.98938e-06	FALSE	FALSE	FALSE
SERTM1	ENSG00000180440	5.59587	2.1804e-15	FALSE	FALSE	FALSE
KCNE1	ENSG00000180509	4.32133	3.49354e-23	FALSE	FALSE	FALSE
PRR26	ENSG00000180525	3.45615	3.45475e-13	FALSE	FALSE	FALSE
ZSCAN4	ENSG00000180532	-4.11506	6.75977e-11	FALSE	FALSE	FALSE
HIST1H2BC	ENSG00000180596	2.09098	1.01262e-08	FALSE	FALSE	FALSE
S1PR5	ENSG00000180739	-2.66955	8.28326e-13	FALSE	FALSE	FALSE
CLRN3	ENSG00000180745	6.08338	5.86445e-22	FALSE	FALSE	FALSE
CHST13	ENSG00000180767	3.55084	2.43709e-17	FALSE	FALSE	FALSE
AGTR2	ENSG00000180772	7.48844	3.53728e-13	FALSE	FALSE	FALSE
MAP3K15	ENSG00000180815	2.09611	1.90014e-06	FALSE	FALSE	FALSE
GREM2	ENSG00000180875	2.85546	3.15488e-06	FALSE	FALSE	FALSE
OXTR	ENSG00000180914	2.00128	1.68885e-06	FALSE	FALSE	FALSE
GPR137C	ENSG00000180998	2.40635	5.59321e-19	FALSE	FALSE	FALSE
FCRL6	ENSG00000181036	2.58409	6.43216e-11	FALSE	FALSE	FALSE
MAPK15	ENSG00000181085	2.39552	5.03076e-07	FALSE	FALSE	FALSE
MUC16	ENSG00000181143	4.55173	1.1477e-12	FALSE	FALSE	FALSE
PENK	ENSG00000181195	-4.20747	1.44689e-09	FALSE	FALSE	FALSE
NME9	ENSG00000181322	2.76955	7.89938e-20	FALSE	FALSE	FALSE
HEPHL1	ENSG00000181333	-2.38728	1.6171e-06	FALSE	FALSE	FALSE
CFAP65	ENSG00000181378	6.13555	4.13005e-34	FALSE	FALSE	FALSE
UTS2R	ENSG00000181408	2.84933	0.000215572	FALSE	FALSE	FALSE
ZNF467	ENSG00000181444	2.49761	9.46223e-18	FALSE	FALSE	FALSE
TMEM45A	ENSG00000181458	-2.78716	1.52125e-11	FALSE	FALSE	FALSE
MAB21L2	ENSG00000181541	2.91579	3.24333e-06	FALSE	FALSE	FALSE
GPR88	ENSG00000181656	-2.02324	0.000261914	FALSE	FALSE	FALSE
TMEM252	ENSG00000181778	4.76803	8.70343e-16	FALSE	FALSE	FALSE
PNMA8A	ENSG00000182013	3.2791	1.81889e-11	FALSE	FALSE	FALSE
TRPC2	ENSG00000182048	2.02461	0.000214831	FALSE	FALSE	FALSE
ENPP7	ENSG00000182156	2.81793	4.94206e-05	FALSE	FALSE	FALSE
FAM153B	ENSG00000182230	2.56001	2.47164e-06	FALSE	FALSE	FALSE
SYNM	ENSG00000182253	-2.20896	8.59141e-09	FALSE	FALSE	FALSE
AP1S2	ENSG00000182287	2.12198	7.4859e-27	FALSE	FALSE	FALSE
KIAA2012	ENSG00000182329	3.83554	1.88631e-14	FALSE	FALSE	FALSE
ZNF804B	ENSG00000182348	-4.69266	2.35616e-06	FALSE	FALSE	FALSE
C17orf77	ENSG00000182352	3.36717	0.000222901	FALSE	FALSE	FALSE
NCF1B	ENSG00000182487	2.08173	1.46005e-09	FALSE	FALSE	FALSE
NA	ENSG00000182502	2.11957	0.000105637	FALSE	FALSE	FALSE
NA	ENSG00000182572	2.94654	2.2554e-06	FALSE	FALSE	FALSE
EPGN	ENSG00000182585	-3.08988	5.92004e-07	FALSE	FALSE	FALSE
SNORC	ENSG00000182600	2.67138	4.39379e-14	FALSE	FALSE	FALSE
HS3ST4	ENSG00000182601	-3.16682	0.000276173	FALSE	FALSE	FALSE
NA	ENSG00000182611	2.78963	4.8358e-07	FALSE	FALSE	FALSE
CCNYL2	ENSG00000182632	-2.41249	0.00103904	FALSE	FALSE	FALSE
MAFA	ENSG00000182759	3.26943	3.2139e-07	FALSE	FALSE	FALSE
HCAR2	ENSG00000182782	-4.7156	4.35697e-25	FALSE	FALSE	FALSE
GALNT9	ENSG00000182870	2.61352	6.46373e-06	FALSE	FALSE	FALSE
COL18A1	ENSG00000182871	2.74771	1.44577e-19	FALSE	FALSE	FALSE
OTOP3	ENSG00000182938	-4.53884	1.29186e-06	FALSE	FALSE	FALSE
SOX1	ENSG00000182968	3.97236	0.000218067	FALSE	FALSE	FALSE
CADM1	ENSG00000182985	2.82796	6.01966e-18	FALSE	FALSE	FALSE
FREM3	ENSG00000183090	4.25835	2.01911e-14	FALSE	FALSE	FALSE
FAM43B	ENSG00000183114	2.19966	1.40071e-07	FALSE	FALSE	FALSE
CALHM3	ENSG00000183128	2.10755	0.000767435	FALSE	FALSE	FALSE
GJD3	ENSG00000183153	2.08062	1.13008e-08	FALSE	FALSE	FALSE
CALN1	ENSG00000183166	2.21735	0.001694	FALSE	FALSE	FALSE
CHST6	ENSG00000183196	2.42814	1.61853e-06	FALSE	FALSE	FALSE
	ENSG00000183239	3.58631	2.29635e-11	FALSE	FALSE	FALSE
WT1-AS	ENSG00000183242	2.21812	0.000207602	FALSE	FALSE	FALSE
CABCOCO1	ENSG00000183346	4.64145	1.13652e-21	FALSE	FALSE	FALSE
GBP6	ENSG00000183347	-7.05484	4.61186e-47	FALSE	FALSE	FALSE
OVCH2	ENSG00000183378	-2.36825	0.000208263	FALSE	FALSE	FALSE
NA	ENSG00000183473	2.50438	1.78694e-06	FALSE	FALSE	FALSE
HIST2H3D	ENSG00000183598	2.35784	6.35087e-07	FALSE	FALSE	FALSE
C11orf88	ENSG00000183644	4.08375	1.54807e-15	FALSE	FALSE	FALSE
GPR1	ENSG00000183671	-2.1775	2.54328e-06	FALSE	FALSE	FALSE
EFHC2	ENSG00000183690	3.74179	2.27297e-17	FALSE	FALSE	FALSE
OPCML	ENSG00000183715	2.18565	0.000296589	FALSE	FALSE	FALSE
NPBWR1	ENSG00000183729	-4.48783	2.77361e-11	FALSE	FALSE	FALSE
ACSM2A	ENSG00000183747	3.60944	1.42851e-06	FALSE	FALSE	FALSE
KCTD8	ENSG00000183783	3.23364	1.15455e-05	FALSE	FALSE	FALSE
ANKRD45	ENSG00000183831	2.81035	3.36635e-10	FALSE	FALSE	FALSE
MAATS1	ENSG00000183833	3.07805	4.89403e-14	FALSE	FALSE	FALSE
PNMA3	ENSG00000183837	4.48505	4.2598e-20	FALSE	FALSE	FALSE
UTY	ENSG00000183878	-9.08093	1.56812e-25	FALSE	FALSE	FALSE
SRARP	ENSG00000183888	7.92062	4.53265e-24	FALSE	FALSE	FALSE
NPW	ENSG00000183971	3.64203	2.64342e-12	FALSE	FALSE	FALSE
TBX1	ENSG00000184058	-2.94675	1.60875e-10	FALSE	FALSE	FALSE
SPRR4	ENSG00000184148	-6.62043	1.7934e-08	FALSE	FALSE	FALSE
ADRA2C	ENSG00000184160	2.91053	1.20402e-10	FALSE	FALSE	FALSE
ALDH1A3	ENSG00000184254	-2.03165	5.28067e-07	FALSE	FALSE	FALSE
CDR1	ENSG00000184258	2.00185	0.000448369	FALSE	FALSE	FALSE
HIST2H2AC	ENSG00000184260	2.7956	6.65492e-15	FALSE	FALSE	FALSE
HIST2H2AB	ENSG00000184270	3.74276	1.01882e-10	FALSE	FALSE	FALSE
S100A7A	ENSG00000184330	-4.70376	1.06944e-05	FALSE	FALSE	FALSE
SRPK3	ENSG00000184343	2.91779	6.97067e-16	FALSE	FALSE	FALSE
HIST1H1B	ENSG00000184357	3.82306	7.87712e-12	FALSE	FALSE	FALSE
LRRC19	ENSG00000184434	3.43727	4.67576e-13	FALSE	FALSE	FALSE
NCMAP	ENSG00000184454	4.05971	2.72263e-19	FALSE	FALSE	FALSE
PTP4A3	ENSG00000184489	2.08667	8.80908e-13	FALSE	FALSE	FALSE
BEX5	ENSG00000184515	3.78158	2.45438e-19	FALSE	FALSE	FALSE
DUSP8	ENSG00000184545	2.01934	5.46305e-10	FALSE	FALSE	FALSE
SLITRK6	ENSG00000184564	-4.34081	1.1428e-10	FALSE	FALSE	FALSE
LPAR5	ENSG00000184574	-2.12065	9.43236e-14	FALSE	FALSE	FALSE
C14orf180	ENSG00000184601	2.67393	0.00271371	FALSE	FALSE	FALSE
RPL7P26	ENSG00000184612	2.31981	8.07469e-09	FALSE	FALSE	FALSE
CLDN6	ENSG00000184697	8.15376	4.53946e-34	FALSE	FALSE	FALSE
LRRC26	ENSG00000184709	5.134	2.41211e-14	FALSE	FALSE	FALSE
TUSC5	ENSG00000184811	3.22081	2.83708e-05	FALSE	FALSE	FALSE
NA	ENSG00000184825	3.46188	3.79444e-11	FALSE	FALSE	FALSE
DRD1	ENSG00000184845	-4.14104	3.97945e-12	FALSE	FALSE	FALSE
CLCNKB	ENSG00000184908	3.55361	3.66633e-12	FALSE	FALSE	FALSE
LCN12	ENSG00000184925	5.45592	6.99299e-53	FALSE	FALSE	FALSE
WT1	ENSG00000184937	3.94412	3.75043e-11	TRUE	FALSE	FALSE
MUC6	ENSG00000184956	8.64306	1.54667e-36	FALSE	FALSE	FALSE
ROBO2	ENSG00000185008	2.41106	9.1795e-06	TRUE	FALSE	FALSE
MROH2A	ENSG00000185038	-2.38027	0.000896049	FALSE	FALSE	FALSE
NA	ENSG00000185087	3.0434	0.000142381	FALSE	FALSE	FALSE
HIST1H2BL	ENSG00000185130	2.14566	2.20018e-06	FALSE	FALSE	FALSE
LINC00482	ENSG00000185168	-3.33658	7.18558e-13	FALSE	FALSE	FALSE
PRSS57	ENSG00000185198	2.66837	7.05116e-05	FALSE	FALSE	FALSE
IFITM2	ENSG00000185201	2.22001	1.37778e-17	FALSE	FALSE	FALSE
PPIL6	ENSG00000185250	2.44951	3.66176e-19	FALSE	FALSE	FALSE
NOTUM	ENSG00000185269	4.83962	1.78319e-14	FALSE	FALSE	FALSE
GALNT17	ENSG00000185274	2.19687	0.000105904	FALSE	FALSE	FALSE
NUPR2	ENSG00000185290	2.08845	0.000472254	FALSE	FALSE	FALSE
SFTPA2	ENSG00000185303	2.45677	0.000191552	FALSE	FALSE	FALSE
TMEM105	ENSG00000185332	-2.20031	1.1694e-05	FALSE	FALSE	FALSE
METTL7A	ENSG00000185432	-2.10029	8.17484e-16	FALSE	FALSE	FALSE
KRT6B	ENSG00000185479	-5.90948	2.06572e-14	FALSE	FALSE	FALSE
MUC1	ENSG00000185499	2.53088	1.46252e-08	FALSE	FALSE	FALSE
PDE6G	ENSG00000185527	3.1151	1.53008e-17	FALSE	FALSE	FALSE
DLK1	ENSG00000185559	8.51752	1.57501e-15	FALSE	FALSE	FALSE
DBX2	ENSG00000185610	2.22199	0.00323404	FALSE	FALSE	FALSE
FAM212A	ENSG00000185614	-2.00488	3.17561e-13	FALSE	FALSE	FALSE
PDIA2	ENSG00000185615	3.02281	1.78141e-06	FALSE	FALSE	FALSE
KRT79	ENSG00000185640	-8.71288	7.58035e-33	FALSE	FALSE	FALSE
POU3F1	ENSG00000185668	-5.55607	5.84296e-34	FALSE	FALSE	FALSE
LYG2	ENSG00000185674	2.7699	9.99453e-15	FALSE	FALSE	FALSE
MORN5	ENSG00000185681	6.28428	2.57752e-24	FALSE	FALSE	FALSE
PRAME	ENSG00000185686	3.76337	4.07906e-08	FALSE	FALSE	FALSE
C6orf201	ENSG00000185689	2.48987	4.05824e-14	FALSE	FALSE	FALSE
NRG3	ENSG00000185737	4.88852	1.99044e-15	FALSE	FALSE	FALSE
C11orf87	ENSG00000185742	-3.11528	1.39943e-05	FALSE	FALSE	FALSE
KCNQ5	ENSG00000185760	-3.15375	3.08996e-12	FALSE	FALSE	FALSE
NAT8L	ENSG00000185818	3.64076	9.94749e-14	FALSE	FALSE	FALSE
RPL12P4	ENSG00000185834	2.32978	5.28853e-15	FALSE	FALSE	FALSE
CCDC190	ENSG00000185860	-2.51705	0.00138702	FALSE	FALSE	FALSE
IFITM1	ENSG00000185885	2.16165	1.49638e-11	FALSE	FALSE	FALSE
KLHL34	ENSG00000185915	2.43425	0.00121754	FALSE	FALSE	FALSE
FAM186A	ENSG00000185958	2.02136	2.1781e-10	FALSE	FALSE	FALSE
LCE3A	ENSG00000185962	-5.32763	3.88892e-05	FALSE	FALSE	FALSE
LCE3E	ENSG00000185966	-6.32196	6.05695e-07	FALSE	FALSE	FALSE
GRK1	ENSG00000185974	2.42385	5.91642e-05	FALSE	FALSE	FALSE
SLITRK2	ENSG00000185985	5.13647	2.2226e-18	FALSE	FALSE	FALSE
ATP4B	ENSG00000186009	4.08076	1.2453e-09	FALSE	FALSE	FALSE
	ENSG00000186076	-2.42685	9.52464e-13	FALSE	FALSE	FALSE
KRT5	ENSG00000186081	-4.85609	2.44531e-12	FALSE	FALSE	TRUE
EDARADD	ENSG00000186197	-3.74121	9.52039e-23	FALSE	FALSE	FALSE
SLC51B	ENSG00000186198	3.31139	4.20619e-14	FALSE	FALSE	FALSE
CYP4F12	ENSG00000186204	-4.32936	1.24939e-18	FALSE	FALSE	FALSE
GPAT2	ENSG00000186281	-2.94229	3.20508e-09	FALSE	FALSE	FALSE
THBS2	ENSG00000186340	-2.19613	4.5949e-07	FALSE	FALSE	FALSE
KRT10	ENSG00000186395	-4.10887	3.16543e-55	FALSE	FALSE	FALSE
KRT3	ENSG00000186442	-2.44414	0.000636255	FALSE	FALSE	FALSE
AKAP14	ENSG00000186471	4.41624	1.62864e-25	FALSE	FALSE	FALSE
RGS7BP	ENSG00000186479	2.29389	2.3055e-06	FALSE	FALSE	FALSE
ANKRD20A5P	ENSG00000186481	-2.50637	3.23515e-08	FALSE	FALSE	FALSE
MYT1L	ENSG00000186487	-2.8486	9.11162e-05	FALSE	FALSE	FALSE
CLCNKA	ENSG00000186510	4.56232	6.41129e-19	FALSE	FALSE	FALSE
CYP4F8	ENSG00000186526	-6.1593	1.56875e-17	FALSE	FALSE	FALSE
CYP4F3	ENSG00000186529	-2.27169	0.000181993	FALSE	FALSE	FALSE
CYP27C1	ENSG00000186684	-3.55837	1.52188e-13	FALSE	FALSE	FALSE
CFAP73	ENSG00000186710	4.30881	4.94327e-30	FALSE	FALSE	FALSE
FOXI2	ENSG00000186766	-3.894	2.11332e-08	FALSE	FALSE	FALSE
VSIG10L	ENSG00000186806	-2.15015	5.13615e-10	FALSE	FALSE	FALSE
NA	ENSG00000186807	-7.61865	2.12628e-26	FALSE	FALSE	FALSE
CXCR3	ENSG00000186810	2.44394	8.62652e-10	FALSE	FALSE	FALSE
KRT16	ENSG00000186832	-4.10903	1.51068e-08	FALSE	FALSE	FALSE
LINC00846	ENSG00000186842	2.11313	6.11518e-09	FALSE	FALSE	FALSE
KRT14	ENSG00000186847	-6.53443	1.27465e-17	FALSE	FALSE	FALSE
QRFPR	ENSG00000186867	-2.97255	3.46296e-05	FALSE	FALSE	FALSE
C1QL4	ENSG00000186897	3.91275	2.38173e-10	FALSE	FALSE	FALSE
SERPINA11	ENSG00000186910	7.58878	7.12802e-21	FALSE	FALSE	FALSE
TMEM232	ENSG00000186952	2.03648	3.57741e-10	FALSE	FALSE	FALSE
LINC01551	ENSG00000186960	2.64754	0.00497861	FALSE	FALSE	FALSE
EMID1	ENSG00000186998	4.23434	9.30952e-34	FALSE	FALSE	FALSE
ESPN	ENSG00000187017	2.2742	1.05827e-06	FALSE	FALSE	FALSE
PNLIPRP1	ENSG00000187021	2.10428	0.00461332	FALSE	FALSE	FALSE
GPR141	ENSG00000187037	2.15385	2.21624e-07	FALSE	FALSE	FALSE
TMPRSS6	ENSG00000187045	2.94549	1.30698e-08	FALSE	FALSE	FALSE
TMPRSS11A	ENSG00000187054	-5.33389	1.24099e-13	FALSE	FALSE	FALSE
AKR1C1	ENSG00000187134	-2.03688	4.858e-05	FALSE	FALSE	FALSE
GCNT1	ENSG00000187210	2.36565	1.53798e-11	FALSE	FALSE	FALSE
WDR86	ENSG00000187260	2.35493	1.28106e-12	FALSE	FALSE	FALSE
EPOR	ENSG00000187266	2.43183	3.30387e-20	FALSE	FALSE	FALSE
CIDEC	ENSG00000187288	3.05803	6.82928e-06	FALSE	FALSE	FALSE
LUZP2	ENSG00000187398	-4.40897	1.66049e-13	FALSE	FALSE	FALSE
CDHR4	ENSG00000187492	6.46243	5.35842e-34	FALSE	FALSE	FALSE
ATP13A5	ENSG00000187527	3.03954	4.02411e-06	FALSE	FALSE	FALSE
TCL6	ENSG00000187621	2.02871	0.000580364	FALSE	FALSE	FALSE
CXorf67	ENSG00000187690	-2.64109	0.000745436	FALSE	FALSE	FALSE
C2orf88	ENSG00000187699	4.75884	1.83899e-35	FALSE	FALSE	FALSE
SLC18A3	ENSG00000187714	3.5765	0.000271324	FALSE	FALSE	FALSE
THSD4	ENSG00000187720	2.24487	2.10059e-09	FALSE	FALSE	FALSE
DNAJB13	ENSG00000187726	2.68321	2.10329e-09	FALSE	FALSE	FALSE
FAM69C	ENSG00000187773	2.46858	0.000206543	FALSE	FALSE	FALSE
TMEM72	ENSG00000187783	9.01122	1.153e-44	FALSE	FALSE	FALSE
ASCL4	ENSG00000187855	4.83199	5.94777e-09	FALSE	FALSE	FALSE
FYB2	ENSG00000187889	5.37166	1.06694e-24	FALSE	FALSE	FALSE
LCN10	ENSG00000187922	3.14363	7.74617e-07	FALSE	FALSE	FALSE
OR7D2	ENSG00000188000	2.78328	1.90949e-05	FALSE	FALSE	FALSE
NWD1	ENSG00000188039	3.06549	5.5319e-11	FALSE	FALSE	FALSE
WNT7B	ENSG00000188064	-3.21739	1.23354e-08	FALSE	FALSE	FALSE
PLA2G4E	ENSG00000188089	-6.02478	1.06694e-24	FALSE	FALSE	FALSE
MESP2	ENSG00000188095	2.94801	2.43976e-10	FALSE	FALSE	FALSE
FAM25A	ENSG00000188100	-5.32091	1.2869e-07	FALSE	FALSE	FALSE
TMEM215	ENSG00000188133	2.59908	0.000589582	FALSE	FALSE	FALSE
OTOG	ENSG00000188162	3.97213	9.8327e-10	FALSE	FALSE	FALSE
SMTNL2	ENSG00000188176	2.38055	1.98467e-06	FALSE	FALSE	FALSE
PLA2G2A	ENSG00000188257	-4.43107	9.85906e-09	FALSE	FALSE	FALSE
RUFY4	ENSG00000188282	2.53729	9.1479e-08	FALSE	FALSE	FALSE
IGFL1	ENSG00000188293	-6.42235	6.68094e-17	FALSE	FALSE	FALSE
ENO4	ENSG00000188316	2.58137	7.34494e-19	FALSE	FALSE	FALSE
SLC38A3	ENSG00000188338	3.38325	4.60941e-11	FALSE	FALSE	FALSE
PDCD1	ENSG00000188389	2.01358	1.96711e-06	FALSE	FALSE	FALSE
TCTEX1D4	ENSG00000188396	3.18867	1.28588e-19	FALSE	FALSE	FALSE
ACTBP11	ENSG00000188460	2.34227	1.64325e-14	FALSE	FALSE	FALSE
SERPINA5	ENSG00000188488	6.5671	2.97311e-32	FALSE	FALSE	FALSE
NCCRP1	ENSG00000188505	-2.53835	5.80152e-06	FALSE	FALSE	FALSE
KRTDAP	ENSG00000188508	-5.72595	3.83219e-17	FALSE	FALSE	FALSE
COL25A1	ENSG00000188517	3.67289	3.44761e-12	FALSE	FALSE	FALSE
CFAP77	ENSG00000188523	3.82802	1.60908e-13	FALSE	FALSE	FALSE
NKAIN2	ENSG00000188580	-3.80422	2.92819e-11	FALSE	FALSE	FALSE
CFAP54	ENSG00000188596	2.27041	3.70037e-10	FALSE	FALSE	FALSE
IGFL3	ENSG00000188624	-2.5379	0.00196653	FALSE	FALSE	FALSE
IDO2	ENSG00000188676	6.39859	1.22253e-37	FALSE	FALSE	FALSE
NOXA1	ENSG00000188747	2.64683	1.96521e-23	FALSE	FALSE	FALSE
BCL2L15	ENSG00000188761	4.65379	2.31943e-32	FALSE	FALSE	FALSE
SHISA6	ENSG00000188803	2.32168	3.13247e-05	FALSE	FALSE	FALSE
SNTN	ENSG00000188817	5.58825	1.26085e-16	FALSE	FALSE	FALSE
ENTPD8	ENSG00000188833	4.2686	3.20874e-20	FALSE	FALSE	FALSE
TMC3	ENSG00000188869	3.38047	7.29681e-13	FALSE	FALSE	FALSE
LRRK2	ENSG00000188906	2.0349	5.98982e-07	FALSE	FALSE	FALSE
GJB3	ENSG00000188910	-2.37121	3.34482e-06	FALSE	FALSE	FALSE
C9orf152	ENSG00000188959	3.47535	3.42082e-14	FALSE	FALSE	FALSE
MSANTD1	ENSG00000188981	2.01909	3.97375e-11	FALSE	FALSE	FALSE
NA	ENSG00000188987	4.32132	2.46909e-23	FALSE	FALSE	FALSE
LRRC66	ENSG00000188993	3.11826	1.31091e-13	FALSE	FALSE	FALSE
SBSN	ENSG00000189001	-5.89681	1.28029e-17	FALSE	FALSE	FALSE
RNF222	ENSG00000189051	-2.54588	2.42697e-07	FALSE	FALSE	FALSE
IL1RAPL2	ENSG00000189108	-2.00033	0.00053232	FALSE	FALSE	FALSE
SP6	ENSG00000189120	-2.66257	1.96551e-13	FALSE	FALSE	FALSE
KRT77	ENSG00000189182	-5.91062	8.90242e-11	FALSE	FALSE	FALSE
MAOA	ENSG00000189221	-2.73228	3.09826e-14	FALSE	FALSE	FALSE
DRICH1	ENSG00000189269	2.53437	2.52048e-12	FALSE	FALSE	FALSE
GJB5	ENSG00000189280	-4.03614	4.40034e-15	FALSE	FALSE	FALSE
ALKAL2	ENSG00000189292	3.72161	1.53082e-12	FALSE	FALSE	FALSE
C6orf222	ENSG00000189325	2.26492	0.00118552	FALSE	FALSE	FALSE
S100A14	ENSG00000189334	-2.81698	1.96067e-10	FALSE	FALSE	FALSE
TOGARAM2	ENSG00000189350	3.29616	6.4985e-20	FALSE	FALSE	FALSE
SH2D5	ENSG00000189410	-2.10613	8.7011e-06	FALSE	FALSE	FALSE
ZFP92	ENSG00000189420	3.2034	1.55606e-14	FALSE	FALSE	FALSE
GJB4	ENSG00000189433	-4.1683	2.54981e-13	FALSE	FALSE	FALSE
PTPRT	ENSG00000196090	3.90833	3.60924e-09	FALSE	FALSE	FALSE
MYBPC1	ENSG00000196091	-3.05306	2.57348e-05	FALSE	FALSE	FALSE
PAX5	ENSG00000196092	-2.36811	1.1999e-05	TRUE	FALSE	TRUE
MYT1	ENSG00000196132	-3.22012	1.21054e-08	FALSE	FALSE	FALSE
SERPINA3	ENSG00000196136	4.05043	1.04943e-10	FALSE	FALSE	FALSE
COLCA1	ENSG00000196167	-2.21944	1.25875e-06	FALSE	FALSE	FALSE
KIF19	ENSG00000196169	4.57323	7.58581e-21	FALSE	FALSE	FALSE
NA	ENSG00000196176	3.89199	6.57724e-12	FALSE	FALSE	FALSE
CTSE	ENSG00000196188	-4.76302	1.38637e-12	FALSE	FALSE	FALSE
GREB1	ENSG00000196208	3.59032	9.86495e-17	FALSE	FALSE	FALSE
NA	ENSG00000196226	2.68769	2.20933e-05	FALSE	FALSE	FALSE
SFTA2	ENSG00000196260	5.51722	2.03846e-16	FALSE	FALSE	FALSE
NA	ENSG00000196331	2.4109	2.93101e-08	FALSE	FALSE	FALSE
ADH7	ENSG00000196344	-9.51162	2.25646e-30	FALSE	FALSE	FALSE
NA	ENSG00000196374	2.44299	6.78277e-05	FALSE	FALSE	FALSE
THEM5	ENSG00000196407	-2.23838	1.46093e-10	FALSE	FALSE	FALSE
PRTN3	ENSG00000196415	2.81521	0.000569554	FALSE	FALSE	FALSE
NA	ENSG00000196533	4.93104	1.1006e-23	FALSE	FALSE	FALSE
SPTSSB	ENSG00000196542	-2.72531	1.10352e-06	FALSE	FALSE	FALSE
MME	ENSG00000196549	-2.32034	1.33348e-05	FALSE	FALSE	FALSE
AJAP1	ENSG00000196581	2.18647	5.71386e-05	FALSE	FALSE	FALSE
ANKRD20A19P	ENSG00000196593	4.65392	1.81675e-09	FALSE	FALSE	FALSE
MMP1	ENSG00000196611	-2.42526	0.000110496	FALSE	FALSE	FALSE
WNK3	ENSG00000196632	2.16499	7.62171e-09	FALSE	FALSE	FALSE
ALKAL1	ENSG00000196711	-2.24386	0.00236715	FALSE	FALSE	FALSE
CLPSL2	ENSG00000196748	2.20751	0.000415604	FALSE	FALSE	FALSE
S100A2	ENSG00000196754	-3.61582	2.51211e-12	FALSE	FALSE	FALSE
TLE1	ENSG00000196781	2.22958	3.01538e-21	FALSE	FALSE	FALSE
SPRR2B	ENSG00000196805	-7.29522	2.67144e-08	FALSE	FALSE	FALSE
HCAR1	ENSG00000196917	-2.55491	7.12034e-08	FALSE	FALSE	FALSE
TMEM26	ENSG00000196932	2.29066	1.45871e-10	FALSE	FALSE	FALSE
DTHD1	ENSG00000197057	3.04737	2.66204e-09	FALSE	FALSE	FALSE
HIST1H4C	ENSG00000197061	5.23732	8.86668e-27	FALSE	FALSE	FALSE
SLC25A29	ENSG00000197119	2.02187	3.47636e-19	FALSE	FALSE	FALSE
	ENSG00000197149	-3.1329	1.12639e-30	FALSE	FALSE	FALSE
NEK5	ENSG00000197168	2.73058	7.91845e-15	FALSE	FALSE	FALSE
ADGRA1	ENSG00000197177	3.73085	6.53311e-06	FALSE	FALSE	FALSE
SERPINA1	ENSG00000197249	3.38132	2.95717e-14	FALSE	FALSE	FALSE
LINC00336	ENSG00000197251	3.11088	2.76444e-13	FALSE	FALSE	FALSE
GUCA2A	ENSG00000197273	-3.72785	1.76037e-05	FALSE	FALSE	FALSE
GATA3-AS1	ENSG00000197308	-5.54125	2.13225e-17	FALSE	FALSE	FALSE
LYPD2	ENSG00000197353	2.66776	0.000601816	FALSE	FALSE	FALSE
BNIP3P1	ENSG00000197358	2.47185	2.67485e-11	FALSE	FALSE	FALSE
ZNF98	ENSG00000197360	2.02841	0.000764546	FALSE	FALSE	FALSE
CYP2B6	ENSG00000197408	6.81251	5.06141e-20	FALSE	FALSE	FALSE
DCHS2	ENSG00000197410	2.5191	6.71497e-07	FALSE	FALSE	FALSE
VEPH1	ENSG00000197415	3.15946	1.84985e-14	FALSE	FALSE	FALSE
GGT3P	ENSG00000197421	2.1025	0.000157395	FALSE	FALSE	FALSE
OPALIN	ENSG00000197430	3.51297	0.000149604	FALSE	FALSE	FALSE
OGDHL	ENSG00000197444	3.1738	5.03975e-10	FALSE	FALSE	FALSE
PRAMENP	ENSG00000197549	2.75305	0.000163592	FALSE	FALSE	FALSE
	ENSG00000197550	2.7281	1.95707e-05	FALSE	FALSE	FALSE
SSPO	ENSG00000197558	2.52282	8.75491e-12	FALSE	FALSE	FALSE
COL4A6	ENSG00000197565	-3.85041	1.50534e-15	FALSE	FALSE	FALSE
GPX1P1	ENSG00000197582	2.61852	1.16255e-09	FALSE	FALSE	FALSE
KCNMB2	ENSG00000197584	2.00464	0.000113274	FALSE	FALSE	FALSE
KLKP1	ENSG00000197588	3.39802	1.321e-05	FALSE	FALSE	FALSE
CCDC154	ENSG00000197599	2.51818	3.03479e-12	FALSE	FALSE	FALSE
MYH6	ENSG00000197616	3.57745	1.68602e-06	FALSE	FALSE	FALSE
SERPINB2	ENSG00000197632	-4.86938	1.41745e-10	FALSE	FALSE	FALSE
DPP4	ENSG00000197635	2.60696	1.97144e-09	FALSE	FALSE	FALSE
SERPINB13	ENSG00000197641	-6.5581	6.65492e-15	FALSE	FALSE	FALSE
NA	ENSG00000197681	-2.3082	4.98282e-10	FALSE	FALSE	FALSE
KLHL14	ENSG00000197705	6.45909	2.30822e-47	FALSE	FALSE	FALSE
CR1L	ENSG00000197721	2.38824	1.28479e-06	FALSE	FALSE	FALSE
SCGB1D4	ENSG00000197745	8.57323	4.46862e-11	FALSE	FALSE	FALSE
CFAP43	ENSG00000197748	3.21375	2.77639e-21	FALSE	FALSE	FALSE
STPG3	ENSG00000197768	2.03656	1.33763e-06	FALSE	FALSE	FALSE
MAP1LC3C	ENSG00000197769	4.56457	3.49103e-20	FALSE	FALSE	FALSE
IGKV7-3	ENSG00000197794	4.72712	8.85955e-08	FALSE	FALSE	FALSE
CCDC180	ENSG00000197816	2.12779	1.52159e-10	FALSE	FALSE	FALSE
UGT2B17	ENSG00000197888	2.24195	0.00612807	FALSE	FALSE	FALSE
SLC22A12	ENSG00000197891	3.89268	3.86343e-05	FALSE	FALSE	FALSE
NRAP	ENSG00000197893	5.88341	1.86358e-16	FALSE	FALSE	FALSE
SLC22A6	ENSG00000197901	3.71015	5.10704e-05	FALSE	FALSE	FALSE
AADACL2	ENSG00000197953	-2.27917	0.00659597	FALSE	FALSE	FALSE
S100A6	ENSG00000197956	-2.03745	2.89031e-10	FALSE	FALSE	FALSE
CCDC151	ENSG00000198003	2.78964	1.08774e-13	FALSE	FALSE	FALSE
TUBA3C	ENSG00000198033	-5.27992	6.10316e-07	FALSE	FALSE	FALSE
NA	ENSG00000198035	-2.30275	3.39871e-07	FALSE	FALSE	FALSE
ZNF667	ENSG00000198046	2.62735	5.85276e-11	FALSE	FALSE	FALSE
AVPR1B	ENSG00000198049	4.47509	6.98088e-15	FALSE	FALSE	FALSE
SULT1C4	ENSG00000198075	3.18553	4.28913e-13	FALSE	FALSE	FALSE
TMPRSS11F	ENSG00000198092	-3.34807	2.2259e-06	FALSE	FALSE	FALSE
SULT1C2	ENSG00000198203	3.51271	4.9914e-16	FALSE	FALSE	FALSE
CACNA1E	ENSG00000198216	2.72786	7.07786e-07	FALSE	FALSE	FALSE
AFDN-DT	ENSG00000198221	2.71125	3.16827e-19	FALSE	FALSE	FALSE
NA	ENSG00000198250	3.62562	3.01836e-07	FALSE	FALSE	FALSE
CARD11	ENSG00000198286	-2.41937	1.0039e-11	FALSE	FALSE	FALSE
PEG3	ENSG00000198300	2.5943	2.09077e-07	FALSE	FALSE	FALSE
NA	ENSG00000198366	2.9889	7.72549e-11	FALSE	FALSE	FALSE
NTRK1	ENSG00000198400	2.23805	2.8727e-09	FALSE	FALSE	FALSE
NA	ENSG00000198477	2.95846	1.79651e-17	FALSE	FALSE	FALSE
B3GNT6	ENSG00000198488	2.05454	0.0088469	FALSE	FALSE	FALSE
CNGA1	ENSG00000198515	-2.62896	2.09484e-10	FALSE	FALSE	FALSE
NA	ENSG00000198518	2.60523	8.65806e-09	FALSE	FALSE	FALSE
C1orf228	ENSG00000198520	2.26184	6.9949e-13	FALSE	FALSE	FALSE
C2CD4A	ENSG00000198535	3.93936	3.69799e-11	FALSE	FALSE	FALSE
ITGBL1	ENSG00000198542	-2.13338	7.75586e-06	FALSE	FALSE	FALSE
KCNRG	ENSG00000198553	2.12874	1.49759e-14	FALSE	FALSE	FALSE
NA	ENSG00000198558	3.84843	2.34082e-06	FALSE	FALSE	FALSE
EIF1AY	ENSG00000198692	-9.43294	3.87903e-26	FALSE	FALSE	FALSE
F5	ENSG00000198734	-2.66847	6.53249e-08	FALSE	FALSE	FALSE
MTCO3P12	ENSG00000198744	4.25584	1.5376e-16	FALSE	FALSE	FALSE
COLGALT2	ENSG00000198756	2.77196	7.40157e-10	FALSE	FALSE	FALSE
APCDD1L	ENSG00000198768	2.16856	0.000193392	FALSE	FALSE	FALSE
BRINP2	ENSG00000198797	2.42317	0.000285442	FALSE	FALSE	FALSE
CES1	ENSG00000198848	-2.25546	0.000138437	FALSE	FALSE	FALSE
DCAF12L1	ENSG00000198889	8.35034	4.13991e-21	FALSE	FALSE	FALSE
L1CAM	ENSG00000198910	2.50033	1.26668e-05	FALSE	FALSE	FALSE
POU3F3	ENSG00000198914	3.74812	6.53842e-06	FALSE	FALSE	FALSE
RNU5E-1	ENSG00000199347	5.30349	1.33142e-16	FALSE	FALSE	FALSE
	ENSG00000199370	3.80308	9.11047e-05	FALSE	FALSE	FALSE
RNU5A-1	ENSG00000199568	5.49233	2.06987e-14	FALSE	FALSE	FALSE
SNORA73B	ENSG00000200087	4.94333	4.53265e-24	FALSE	FALSE	FALSE
RNU5B-1	ENSG00000200156	8.24628	1.15366e-20	FALSE	FALSE	FALSE
RN7SKP255	ENSG00000200312	5.6396	1.96278e-09	FALSE	FALSE	FALSE
SNORA71D	ENSG00000200354	4.48462	7.58042e-10	FALSE	FALSE	FALSE
RN7SKP203	ENSG00000200488	5.20694	1.50226e-08	FALSE	FALSE	FALSE
RNU4-1	ENSG00000200795	5.29688	3.67792e-17	FALSE	FALSE	FALSE
SNORA74A	ENSG00000200959	4.63127	8.58266e-11	FALSE	FALSE	FALSE
RNY1	ENSG00000201098	6.74085	2.13812e-18	FALSE	FALSE	FALSE
RN7SKP71	ENSG00000201428	4.15759	7.77522e-07	FALSE	FALSE	FALSE
RN7SKP9	ENSG00000201793	4.17824	5.63131e-10	FALSE	FALSE	FALSE
SNORA23	ENSG00000201998	5.2336	7.19226e-19	FALSE	FALSE	FALSE
RN7SKP80	ENSG00000202058	2.01565	1.97474e-08	FALSE	FALSE	FALSE
[truncated: 1,116 more rows]

## Sheet: Data 1.2
Gene name	Ensembl ID	Drivers	Meiosis GO biological process	Differentially expressed in PRDM9 transfected cells
ITGA2B	ENSG00000005961	FALSE	FALSE	FALSE
CRLF1	ENSG00000006016	FALSE	FALSE	FALSE
CEACAM7	ENSG00000007306	FALSE	FALSE	FALSE
PAX6	ENSG00000007372	FALSE	FALSE	FALSE
DPF1	ENSG00000011332	FALSE	FALSE	FALSE
ATP1A2	ENSG00000018625	FALSE	FALSE	FALSE
CYP24A1	ENSG00000019186	FALSE	FALSE	FALSE
NLRP2	ENSG00000022556	FALSE	FALSE	FALSE
BARX2	ENSG00000043039	FALSE	FALSE	FALSE
CAMK2B	ENSG00000058404	FALSE	FALSE	FALSE
DGKG	ENSG00000058866	FALSE	FALSE	FALSE
LTK	ENSG00000062524	FALSE	FALSE	FALSE
SEZ6	ENSG00000063015	FALSE	FALSE	FALSE
NGFR	ENSG00000064300	FALSE	FALSE	TRUE
PAGE1	ENSG00000068985	FALSE	FALSE	FALSE
CYP2W1	ENSG00000073067	FALSE	FALSE	FALSE
PAK3	ENSG00000077264	FALSE	FALSE	FALSE
ACTN2	ENSG00000077522	FALSE	FALSE	FALSE
CDH17	ENSG00000079112	FALSE	FALSE	FALSE
CXCL2	ENSG00000081041	FALSE	FALSE	FALSE
ARG2	ENSG00000081181	FALSE	FALSE	FALSE
NA	ENSG00000090920	FALSE	FALSE	FALSE
NLRP1	ENSG00000091592	FALSE	FALSE	FALSE
AGO1	ENSG00000092847	FALSE	FALSE	FALSE
CRTAC1	ENSG00000095713	FALSE	FALSE	FALSE
PGC	ENSG00000096088	FALSE	FALSE	FALSE
EFNA2	ENSG00000099617	FALSE	FALSE	FALSE
IGFALS	ENSG00000099769	FALSE	FALSE	FALSE
IGF2-AS	ENSG00000099869	FALSE	FALSE	FALSE
SLC7A4	ENSG00000099960	FALSE	FALSE	FALSE
CHGA	ENSG00000100604	FALSE	FALSE	FALSE
DHRS2	ENSG00000100867	FALSE	FALSE	FALSE
BMP7	ENSG00000101144	FALSE	FALSE	FALSE
NOL4	ENSG00000101746	FALSE	FALSE	FALSE
PCSK1N	ENSG00000102109	FALSE	FALSE	FALSE
PCYT1B	ENSG00000102230	FALSE	FALSE	FALSE
NALCN	ENSG00000102452	FALSE	FALSE	FALSE
TMC5	ENSG00000103534	FALSE	FALSE	FALSE
EPHX3	ENSG00000105131	FALSE	FALSE	FALSE
APLP1	ENSG00000105290	FALSE	FALSE	FALSE
SIGLEC6	ENSG00000105492	FALSE	FALSE	FALSE
HAS1	ENSG00000105509	FALSE	FALSE	FALSE
COMP	ENSG00000105664	FALSE	FALSE	FALSE
TMEM59L	ENSG00000105696	FALSE	FALSE	FALSE
SORCS1	ENSG00000108018	FALSE	FALSE	FALSE
ALDH3A1	ENSG00000108602	FALSE	FALSE	FALSE
NME5	ENSG00000112981	FALSE	FALSE	FALSE
PCDHB3	ENSG00000113205	FALSE	FALSE	FALSE
IL1A	ENSG00000115008	FALSE	FALSE	FALSE
ZAP70	ENSG00000115085	FALSE	FALSE	FALSE
SLC30A3	ENSG00000115194	FALSE	FALSE	FALSE
CD207	ENSG00000116031	FALSE	FALSE	FALSE
TPSG1	ENSG00000116176	FALSE	FALSE	FALSE
CCDC181	ENSG00000117477	FALSE	FALSE	FALSE
A4GNT	ENSG00000118017	FALSE	FALSE	FALSE
TRIM67	ENSG00000119283	FALSE	FALSE	FALSE
PPP4R4	ENSG00000119698	FALSE	FALSE	FALSE
EPCAM	ENSG00000119888	FALSE	FALSE	FALSE
SCGB2A1	ENSG00000124939	FALSE	FALSE	FALSE
SSUH2	ENSG00000125046	FALSE	FALSE	FALSE
FOSB	ENSG00000125740	FALSE	FALSE	FALSE
S1PR4	ENSG00000125910	FALSE	FALSE	FALSE
CITED1	ENSG00000125931	FALSE	FALSE	FALSE
CTAG2	ENSG00000126890	FALSE	FALSE	FALSE
RASL11B	ENSG00000128045	FALSE	FALSE	FALSE
MGAT3	ENSG00000128268	FALSE	FALSE	FALSE
FLNC	ENSG00000128591	FALSE	FALSE	FALSE
KLK10	ENSG00000129451	FALSE	FALSE	FALSE
OLFM1	ENSG00000130558	FALSE	FALSE	FALSE
CALY	ENSG00000130643	FALSE	FALSE	FALSE
MNX1	ENSG00000130675	FALSE	FALSE	FALSE
DUSP9	ENSG00000130829	FALSE	FALSE	FALSE
RTBDN	ENSG00000132026	FALSE	FALSE	FALSE
IQCA1	ENSG00000132321	FALSE	FALSE	FALSE
BCAN	ENSG00000132692	FALSE	FALSE	FALSE
LGR6	ENSG00000133067	FALSE	FALSE	FALSE
BEX1	ENSG00000133169	FALSE	FALSE	FALSE
ADAMDEC1	ENSG00000134028	FALSE	FALSE	FALSE
WNT2B	ENSG00000134245	FALSE	FALSE	FALSE
SOX3	ENSG00000134595	FALSE	FALSE	FALSE
IER3	ENSG00000137331	FALSE	FALSE	FALSE
TMPRSS4	ENSG00000137648	FALSE	FALSE	FALSE
TMEM132B	ENSG00000139364	FALSE	FALSE	FALSE
RPL3L	ENSG00000140986	FALSE	FALSE	FALSE
RNF157	ENSG00000141576	FALSE	FALSE	FALSE
IGLON5	ENSG00000142549	FALSE	FALSE	FALSE
HORMAD1	ENSG00000143452	FALSE	TRUE	FALSE
GC	ENSG00000145321	FALSE	FALSE	FALSE
CDH18	ENSG00000145526	FALSE	FALSE	FALSE
SCUBE3	ENSG00000146197	FALSE	FALSE	FALSE
LCN2	ENSG00000148346	FALSE	FALSE	FALSE
SCGB1A1	ENSG00000149021	FALSE	FALSE	FALSE
SYT8	ENSG00000149043	FALSE	FALSE	FALSE
NCAM1	ENSG00000149294	FALSE	FALSE	FALSE
PLCH2	ENSG00000149527	FALSE	FALSE	FALSE
NPAS3	ENSG00000151322	FALSE	FALSE	FALSE
CPB1	ENSG00000153002	FALSE	FALSE	FALSE
C16orf74	ENSG00000154102	FALSE	FALSE	FALSE
CDH12	ENSG00000154162	FALSE	FALSE	FALSE
2018-09-14	ENSG00000154997	FALSE	FALSE	FALSE
NAT2	ENSG00000156006	FALSE	FALSE	FALSE
MAGEA8	ENSG00000156009	FALSE	FALSE	FALSE
SST	ENSG00000157005	FALSE	FALSE	FALSE
CLEC18C	ENSG00000157335	FALSE	FALSE	FALSE
CACNA2D3	ENSG00000157445	FALSE	FALSE	FALSE
DPYSL5	ENSG00000157851	FALSE	FALSE	FALSE
SLC30A2	ENSG00000158014	FALSE	FALSE	FALSE
PKD1L1	ENSG00000158683	FALSE	FALSE	FALSE
ZNF208	ENSG00000160321	FALSE	FALSE	FALSE
PTH1R	ENSG00000160801	FALSE	FALSE	FALSE
FGF19	ENSG00000162344	FALSE	FALSE	FALSE
S100A12	ENSG00000163221	FALSE	FALSE	FALSE
ELF3	ENSG00000163435	TRUE	FALSE	FALSE
NEK10	ENSG00000163491	FALSE	FALSE	FALSE
CXCL3	ENSG00000163734	FALSE	FALSE	FALSE
CXCL1	ENSG00000163739	FALSE	FALSE	FALSE
ZC3H12A	ENSG00000163874	FALSE	FALSE	FALSE
SPINK1	ENSG00000164266	FALSE	FALSE	FALSE
CDC20B	ENSG00000164287	FALSE	FALSE	FALSE
ENPP6	ENSG00000164303	FALSE	FALSE	FALSE
OTOGL	ENSG00000165899	FALSE	FALSE	FALSE
	ENSG00000167355	FALSE	FALSE	FALSE
KLK4	ENSG00000167749	FALSE	FALSE	FALSE
MGAT5B	ENSG00000167889	FALSE	FALSE	FALSE
MN1	ENSG00000169184	FALSE	FALSE	FALSE
GP2	ENSG00000169347	FALSE	FALSE	FALSE
MUC3A	ENSG00000169894	FALSE	FALSE	FALSE
FOS	ENSG00000170345	FALSE	FALSE	FALSE
CST1	ENSG00000170373	FALSE	FALSE	FALSE
GTSF1	ENSG00000170627	FALSE	FALSE	FALSE
HTRA3	ENSG00000170801	FALSE	FALSE	FALSE
JUNB	ENSG00000171223	FALSE	FALSE	FALSE
KRT19	ENSG00000171345	FALSE	FALSE	FALSE
COL24A1	ENSG00000171502	FALSE	FALSE	FALSE
KNDC1	ENSG00000171798	FALSE	FALSE	FALSE
ZNF540	ENSG00000171817	FALSE	FALSE	FALSE
CCL19	ENSG00000172724	FALSE	FALSE	FALSE
COL6A5	ENSG00000172752	FALSE	FALSE	FALSE
ARPP21	ENSG00000172995	FALSE	FALSE	FALSE
BNC2	ENSG00000173068	TRUE	FALSE	FALSE
TDRD12	ENSG00000173809	FALSE	TRUE	FALSE
SPSB4	ENSG00000175093	FALSE	FALSE	FALSE
CADM2	ENSG00000175161	FALSE	FALSE	FALSE
CCNE2	ENSG00000175305	FALSE	TRUE	FALSE
LRRTM4	ENSG00000176204	FALSE	FALSE	FALSE
SOX11	ENSG00000176887	FALSE	FALSE	FALSE
RFLNA	ENSG00000178882	FALSE	FALSE	FALSE
TMEM151A	ENSG00000179292	FALSE	FALSE	FALSE
EGR3	ENSG00000179388	FALSE	FALSE	FALSE
APOBEC3B	ENSG00000179750	FALSE	FALSE	FALSE
SOX2	ENSG00000181449	FALSE	FALSE	FALSE
FDCSP	ENSG00000181617	FALSE	FALSE	FALSE
ADGRB1	ENSG00000181790	FALSE	FALSE	FALSE
PNMA8A	ENSG00000182013	FALSE	FALSE	FALSE
CACNB4	ENSG00000182389	FALSE	FALSE	FALSE
BEGAIN	ENSG00000183092	FALSE	FALSE	FALSE
WT1-AS	ENSG00000183242	FALSE	FALSE	FALSE
CABCOCO1	ENSG00000183346	FALSE	FALSE	FALSE
PCBP3	ENSG00000183570	FALSE	FALSE	FALSE
TBX1	ENSG00000184058	FALSE	FALSE	FALSE
TACSTD2	ENSG00000184292	FALSE	FALSE	FALSE
MAFF	ENSG00000185022	FALSE	FALSE	FALSE
KRT6B	ENSG00000185479	FALSE	FALSE	FALSE
NR2F2	ENSG00000185551	TRUE	FALSE	FALSE
KRT5	ENSG00000186081	FALSE	FALSE	TRUE
VSIG10L	ENSG00000186806	FALSE	FALSE	FALSE
DCC	ENSG00000187323	FALSE	FALSE	FALSE
TMEM72	ENSG00000187783	FALSE	FALSE	FALSE
DMBT1	ENSG00000187908	FALSE	FALSE	FALSE
PRSS45	ENSG00000188086	FALSE	FALSE	FALSE
PLA2G2A	ENSG00000188257	FALSE	FALSE	FALSE
C22orf34	ENSG00000188511	FALSE	FALSE	FALSE
VWC2	ENSG00000188730	FALSE	FALSE	FALSE
SBSN	ENSG00000189001	FALSE	FALSE	FALSE
ALKAL2	ENSG00000189292	FALSE	FALSE	FALSE
SERPINA3	ENSG00000196136	FALSE	FALSE	FALSE
STK31	ENSG00000196335	FALSE	FALSE	FALSE
POTEF	ENSG00000196604	FALSE	FALSE	FALSE
MMP1	ENSG00000196611	FALSE	FALSE	FALSE
SLC6A17	ENSG00000197106	FALSE	FALSE	FALSE
	ENSG00000197301	FALSE	FALSE	FALSE
LYPD2	ENSG00000197353	FALSE	FALSE	FALSE
ZNF675	ENSG00000197372	FALSE	FALSE	FALSE
UGT2B17	ENSG00000197888	FALSE	FALSE	FALSE
ELOVL2	ENSG00000197977	FALSE	FALSE	FALSE
C2CD4A	ENSG00000198535	FALSE	FALSE	FALSE
MUC2	ENSG00000198788	FALSE	FALSE	FALSE
DUSP27	ENSG00000198842	FALSE	FALSE	FALSE
TOX	ENSG00000198846	FALSE	FALSE	FALSE
PNMA5	ENSG00000198883	FALSE	FALSE	FALSE
POU3F3	ENSG00000198914	FALSE	FALSE	FALSE
TRIM31	ENSG00000204616	FALSE	FALSE	FALSE
MT1M	ENSG00000205364	FALSE	FALSE	FALSE
KRT81	ENSG00000205426	FALSE	FALSE	FALSE
	ENSG00000206532	FALSE	FALSE	FALSE
MT-TT	ENSG00000210195	FALSE	FALSE	FALSE
IGLV4-69	ENSG00000211637	FALSE	FALSE	FALSE
IGLV3-9	ENSG00000211670	FALSE	FALSE	FALSE
IGHM	ENSG00000211899	FALSE	FALSE	FALSE
IGHV6-1	ENSG00000211933	FALSE	FALSE	FALSE
IGHV1-3	ENSG00000211935	FALSE	FALSE	FALSE
IGHV2-5	ENSG00000211937	FALSE	FALSE	FALSE
IGHV4-34	ENSG00000211956	FALSE	FALSE	FALSE
HBE1	ENSG00000213931	FALSE	FALSE	FALSE
UCA1	ENSG00000214049	FALSE	FALSE	FALSE
FAM19A5	ENSG00000219438	FALSE	FALSE	FALSE
ACTBP8	ENSG00000220267	FALSE	FALSE	FALSE
NPTXR	ENSG00000221890	FALSE	FALSE	FALSE
NA	ENSG00000222040	FALSE	FALSE	FALSE
PRRT4	ENSG00000224940	FALSE	FALSE	FALSE
LTB	ENSG00000227507	FALSE	FALSE	FALSE
	ENSG00000227591	FALSE	FALSE	FALSE
XIST	ENSG00000229807	FALSE	FALSE	FALSE
TNF	ENSG00000232810	FALSE	FALSE	FALSE
	ENSG00000233251	FALSE	FALSE	FALSE
PAGE2	ENSG00000234068	FALSE	FALSE	FALSE
	ENSG00000236318	FALSE	FALSE	FALSE
PRSS56	ENSG00000237412	FALSE	FALSE	FALSE
PAGE2B	ENSG00000238269	FALSE	FALSE	FALSE
CPHL1P	ENSG00000240216	FALSE	FALSE	FALSE
LINC00996	ENSG00000242258	FALSE	FALSE	FALSE
IGKV1-5	ENSG00000243466	FALSE	FALSE	FALSE
UPK3B	ENSG00000243566	FALSE	FALSE	FALSE
LINC02086	ENSG00000244649	FALSE	FALSE	FALSE
KCTD21-AS1	ENSG00000246174	FALSE	FALSE	FALSE
	ENSG00000247134	FALSE	FALSE	FALSE
ADH1C	ENSG00000248144	FALSE	FALSE	FALSE
LINC02432	ENSG00000248810	FALSE	FALSE	FALSE
LINC00942	ENSG00000249628	FALSE	FALSE	FALSE
FER1L5	ENSG00000249715	FALSE	FALSE	FALSE
LINC00958	ENSG00000251381	FALSE	FALSE	FALSE
PCDHGB4	ENSG00000253953	FALSE	FALSE	FALSE
ZNF486	ENSG00000256229	FALSE	FALSE	FALSE
TMEM179	ENSG00000258986	FALSE	FALSE	FALSE
IGHV4OR15-8	ENSG00000259261	FALSE	FALSE	FALSE
	ENSG00000260461	FALSE	FALSE	FALSE
	ENSG00000261188	FALSE	FALSE	FALSE
NA	ENSG00000261589	FALSE	FALSE	FALSE
NA	ENSG00000261685	FALSE	FALSE	FALSE
MIA	ENSG00000261857	FALSE	FALSE	FALSE
ZNF793-AS1	ENSG00000266916	FALSE	FALSE	FALSE
	ENSG00000270066	FALSE	FALSE	FALSE
MTRNR2L2	ENSG00000271043	FALSE	FALSE	FALSE
IGHV1OR15-3	ENSG00000271288	FALSE	FALSE	FALSE
	ENSG00000273100	FALSE	FALSE	FALSE
#Differentially expressed genes in cancers expressing PRDM9, when each cancer type was analysed separately, in two or more cancer types
#Differentiallly expressed genes based on log2(foldchange) > 2 and p-values adjusted to assess the false discovery rate using the Benjamini and Hochberg procedure below a threshold for FDR < 0.01.
#Additional columns identify genes overlapping genes in the driver gene list from the Intogen ressource(Gundem et al.2010), in the meiosis biological process GO term (GO:0051321), and in differentially expressed genes in PRDM9 transfected cells (Altemose et al. 2017).

## Sheet: Data 1.3
Gene name	Ensembl ID	log2FoldChange	Adjusted pval	Drivers	Meiosis GO biological process	Differentially expressed in PRDM9 transfected cells
RECQL	ENSG00000004700	0.161615	0.00770458	FALSE	FALSE	FALSE
ARX	ENSG00000004848	0.89728	0.00415078	FALSE	FALSE	FALSE
CACNG3	ENSG00000006116	1.60866	1.00591e-08	FALSE	FALSE	FALSE
CX3CL1	ENSG00000006210	-0.423317	0.00135149	FALSE	FALSE	FALSE
PNPLA4	ENSG00000006757	-0.263383	0.0011192	FALSE	FALSE	FALSE
TKTL1	ENSG00000007350	0.8299	0.00515427	FALSE	FALSE	FALSE
FMO3	ENSG00000007933	-0.569239	0.00536529	FALSE	FALSE	FALSE
CAMK1G	ENSG00000008118	0.499962	0.00734843	FALSE	FALSE	FALSE
TENM1	ENSG00000009694	0.640214	0.00379401	FALSE	FALSE	FALSE
IYD	ENSG00000009765	-0.666712	0.00531416	FALSE	FALSE	FALSE
DPF1	ENSG00000011332	0.619637	1.01206e-06	FALSE	FALSE	FALSE
DCN	ENSG00000011465	-0.502503	0.00697479	FALSE	FALSE	FALSE
KDM5D	ENSG00000012817	0.603746	0.00945514	FALSE	FALSE	FALSE
STMN4	ENSG00000015592	0.695235	0.0026308	FALSE	FALSE	FALSE
ATP1A2	ENSG00000018625	0.818217	6.27726e-05	FALSE	FALSE	FALSE
C8B	ENSG00000021852	1.26517	7.20587e-05	FALSE	FALSE	FALSE
DEPDC1	ENSG00000024526	0.349232	0.00868055	FALSE	FALSE	FALSE
AGPAT4	ENSG00000026652	0.363165	0.00224075	FALSE	FALSE	FALSE
MUSK	ENSG00000030304	0.624602	0.00402762	FALSE	FALSE	FALSE
LRRC7	ENSG00000033122	0.364837	0.00995707	FALSE	FALSE	FALSE
CASR	ENSG00000036828	1.15696	8.24977e-06	FALSE	FALSE	FALSE
SOX30	ENSG00000039600	0.47251	0.00464546	FALSE	FALSE	FALSE
CDH10	ENSG00000040731	1.03752	0.00244332	FALSE	FALSE	FALSE
COL9A2	ENSG00000049089	0.466313	0.00411419	FALSE	FALSE	FALSE
NA	ENSG00000049319	0.6671	0.00230088	FALSE	FALSE	FALSE
MCF2L2	ENSG00000053524	0.474904	0.000187733	FALSE	FALSE	FALSE
LAMA3	ENSG00000053747	0.498421	0.00194963	FALSE	FALSE	FALSE
ENTPD2	ENSG00000054179	0.870162	2.97852e-08	FALSE	FALSE	FALSE
FAM168A	ENSG00000054965	0.155695	0.00773225	FALSE	FALSE	FALSE
NPFFR2	ENSG00000056291	1.45678	6.16207e-07	FALSE	FALSE	FALSE
BCL3	ENSG00000069399	-0.321111	0.000649734	FALSE	FALSE	FALSE
TCF3	ENSG00000071564	0.192956	0.0097258	FALSE	FALSE	FALSE
SLC6A15	ENSG00000072041	1.22123	0.00064116	FALSE	FALSE	FALSE
ASIC4	ENSG00000072182	0.613125	0.000530984	FALSE	FALSE	FALSE
TRPC5	ENSG00000072315	0.892749	0.000187733	FALSE	FALSE	FALSE
TRHDE	ENSG00000072657	0.672509	0.00851433	FALSE	FALSE	FALSE
CYP2W1	ENSG00000073067	1.16053	7.76144e-08	FALSE	FALSE	FALSE
ABCB11	ENSG00000073734	0.723957	0.00479639	FALSE	FALSE	FALSE
CA12	ENSG00000074410	-0.579917	0.0032728	FALSE	FALSE	FALSE
ACAT1	ENSG00000075239	-0.252608	0.00487948	FALSE	FALSE	FALSE
FSCN1	ENSG00000075618	0.440113	0.000426713	FALSE	FALSE	FALSE
WDR62	ENSG00000075702	0.280928	0.00640648	FALSE	FALSE	FALSE
GPATCH1	ENSG00000076650	0.162923	0.00582638	FALSE	FALSE	FALSE
DCX	ENSG00000077279	1.08152	4.69755e-05	FALSE	FALSE	FALSE
SPAG6	ENSG00000077327	0.761441	0.00581574	FALSE	FALSE	FALSE
NAALAD2	ENSG00000077616	0.488136	2.18408e-05	FALSE	FALSE	FALSE
SMC1B	ENSG00000077935	0.642403	0.000369647	FALSE	TRUE	FALSE
TP73	ENSG00000078900	0.437125	0.00306766	FALSE	FALSE	FALSE
CEACAM1	ENSG00000079385	-0.373004	0.00956158	FALSE	FALSE	FALSE
AFM	ENSG00000079557	1.01219	0.00558438	FALSE	FALSE	FALSE
PTPRH	ENSG00000080031	-0.647124	0.000189452	FALSE	FALSE	FALSE
CPB2	ENSG00000080618	0.817076	0.000190263	FALSE	FALSE	FALSE
CFHR2	ENSG00000080910	1.74046	0.000794753	FALSE	FALSE	FALSE
AFP	ENSG00000081051	0.964641	0.000708587	FALSE	FALSE	FALSE
IMPG2	ENSG00000081148	0.68279	1.17036e-06	FALSE	FALSE	FALSE
CACNA1S	ENSG00000081248	0.897019	0.0019382	FALSE	FALSE	FALSE
SLC13A1	ENSG00000081800	1.21784	0.00230642	FALSE	FALSE	FALSE
WDR70	ENSG00000082068	0.137583	0.00203091	FALSE	FALSE	FALSE
SEMA5B	ENSG00000082684	0.599517	9.3165e-05	FALSE	FALSE	FALSE
APOB	ENSG00000084674	0.683094	0.00938729	FALSE	FALSE	FALSE
HACE1	ENSG00000085382	0.227656	0.00108245	FALSE	FALSE	FALSE
WNT11	ENSG00000085741	-0.664386	0.00214853	FALSE	FALSE	FALSE
CEACAM6	ENSG00000086548	-1.1305	0.000112372	FALSE	FALSE	FALSE
FAT2	ENSG00000086570	0.499556	0.0058217	TRUE	FALSE	FALSE
MT3	ENSG00000087250	0.724753	0.00513303	FALSE	FALSE	FALSE
NA	ENSG00000087916	-0.938987	0.00242848	FALSE	FALSE	FALSE
SI	ENSG00000090402	1.64845	0.000310275	FALSE	FALSE	FALSE
NLRP1	ENSG00000091592	0.322796	0.00293746	FALSE	FALSE	FALSE
RGS17	ENSG00000091844	0.464731	0.000122586	FALSE	FALSE	FALSE
RPGRIP1	ENSG00000092200	0.321996	0.00123038	FALSE	FALSE	FALSE
TGM1	ENSG00000092295	0.609599	0.000468608	FALSE	FALSE	FALSE
TYRO3	ENSG00000092445	0.316313	0.00730324	FALSE	FALSE	FALSE
CLSPN	ENSG00000092853	0.356803	0.00212045	TRUE	FALSE	FALSE
GABRP	ENSG00000094755	-0.698262	0.00730324	FALSE	FALSE	FALSE
KRT31	ENSG00000094796	1.03611	0.00403521	FALSE	FALSE	FALSE
NXPE1	ENSG00000095110	0.758194	0.00203091	FALSE	FALSE	FALSE
PGC	ENSG00000096088	1.3575	4.13865e-06	FALSE	FALSE	FALSE
MYO9B	ENSG00000099331	0.172689	0.0022079	FALSE	FALSE	FALSE
MAGEB2	ENSG00000099399	1.79754	0.00152751	FALSE	FALSE	FALSE
HPS4	ENSG00000100099	0.153383	0.00678665	FALSE	FALSE	FALSE
SOX10	ENSG00000100146	0.955662	4.29942e-05	FALSE	FALSE	FALSE
DMC1	ENSG00000100206	0.509656	0.000144721	FALSE	TRUE	FALSE
MLC1	ENSG00000100427	0.581502	0.00734843	FALSE	FALSE	FALSE
ISM2	ENSG00000100593	1.26909	1.00854e-09	FALSE	FALSE	FALSE
SLC32A1	ENSG00000101438	1.64776	1.39312e-07	FALSE	FALSE	FALSE
NOL4	ENSG00000101746	0.855873	0.00323262	FALSE	FALSE	FALSE
MCF2	ENSG00000101977	0.589586	0.000560091	FALSE	FALSE	FALSE
F9	ENSG00000101981	2.2649	2.30107e-06	FALSE	FALSE	FALSE
SCML2	ENSG00000102098	0.379197	0.00806622	FALSE	FALSE	FALSE
OLFM4	ENSG00000102837	-1.06458	0.00353411	FALSE	FALSE	FALSE
ZNF821	ENSG00000102984	0.177743	0.00840329	FALSE	FALSE	FALSE
HAS3	ENSG00000103044	0.505569	0.000333691	FALSE	FALSE	FALSE
HSDL1	ENSG00000103160	0.168171	0.00518223	FALSE	FALSE	FALSE
AQP8	ENSG00000103375	0.766446	0.00070112	FALSE	FALSE	FALSE
TMC5	ENSG00000103534	-0.848945	1.66987e-05	FALSE	FALSE	FALSE
FAH	ENSG00000103876	-0.262398	0.00442804	FALSE	FALSE	FALSE
NIPAL2	ENSG00000104361	-0.248689	0.00576096	FALSE	FALSE	FALSE
PLAT	ENSG00000104368	-0.519768	0.00043263	FALSE	FALSE	FALSE
TSTA3	ENSG00000104522	-0.239808	0.000967366	FALSE	FALSE	FALSE
GSR	ENSG00000104687	-0.249233	0.0034381	FALSE	FALSE	FALSE
NEFM	ENSG00000104722	0.812256	0.00411419	FALSE	FALSE	FALSE
TULP2	ENSG00000104804	0.505188	0.00209616	FALSE	FALSE	FALSE
RNASEH2A	ENSG00000104889	0.2395	0.00163109	FALSE	FALSE	FALSE
SLC1A6	ENSG00000105143	1.04558	0.000377258	FALSE	FALSE	FALSE
POP4	ENSG00000105171	0.220191	0.00112108	FALSE	FALSE	FALSE
CCNE1	ENSG00000105173	0.350165	0.00326493	FALSE	TRUE	FALSE
CNTD2	ENSG00000105219	0.646368	0.000553858	FALSE	FALSE	FALSE
PLD3	ENSG00000105223	0.239238	0.00441334	FALSE	FALSE	FALSE
APLP1	ENSG00000105290	0.724055	3.38216e-06	FALSE	FALSE	FALSE
CEACAM5	ENSG00000105388	-1.04767	0.00403527	FALSE	FALSE	FALSE
SYNGR4	ENSG00000105467	0.753345	5.03278e-07	FALSE	FALSE	FALSE
CACNG7	ENSG00000105605	1.47911	1.86482e-08	FALSE	FALSE	FALSE
UPK1A	ENSG00000105668	1.02492	1.68556e-05	FALSE	FALSE	FALSE
TMEM59L	ENSG00000105696	0.555775	0.00577246	FALSE	FALSE	FALSE
GSDME	ENSG00000105928	0.350576	0.00427933	FALSE	FALSE	FALSE
EZH2	ENSG00000106462	0.264765	0.00256996	TRUE	FALSE	FALSE
MEOX2	ENSG00000106511	0.632135	0.00282569	FALSE	FALSE	FALSE
AGR2	ENSG00000106541	-0.786482	0.00878246	FALSE	FALSE	FALSE
SLC1A1	ENSG00000106688	-0.4686	0.00582264	FALSE	FALSE	FALSE
AK1	ENSG00000106992	-0.262607	0.00616914	FALSE	FALSE	FALSE
ELAVL2	ENSG00000107105	0.829305	8.7278e-05	FALSE	FALSE	FALSE
LHX3	ENSG00000107187	1.29114	7.20587e-05	FALSE	FALSE	FALSE
BAG1	ENSG00000107262	-0.211372	0.00644278	FALSE	FALSE	FALSE
NA	ENSG00000107623	0.688844	0.0043217	FALSE	FALSE	FALSE
TLX1	ENSG00000107807	0.803629	0.00624234	FALSE	FALSE	FALSE
DKK1	ENSG00000107984	1.25422	8.28519e-08	FALSE	FALSE	FALSE
EBF3	ENSG00000108001	0.551408	0.00087637	FALSE	FALSE	FALSE
SORCS1	ENSG00000108018	0.726542	0.00858917	FALSE	FALSE	FALSE
LGI1	ENSG00000108231	1.20784	0.000537746	FALSE	FALSE	FALSE
CCL7	ENSG00000108688	0.775277	0.00613803	FALSE	FALSE	FALSE
MYH1	ENSG00000109061	0.960835	0.00355995	FALSE	FALSE	FALSE
FOXN1	ENSG00000109101	0.719496	0.00146065	FALSE	FALSE	FALSE
GNRHR	ENSG00000109163	0.381358	0.0053034	FALSE	FALSE	FALSE
UGT2B10	ENSG00000109181	1.18235	0.00435272	FALSE	FALSE	FALSE
UGDH	ENSG00000109814	-0.27208	0.00554883	FALSE	FALSE	FALSE
P2RX3	ENSG00000109991	0.873321	5.24796e-05	FALSE	FALSE	FALSE
DCPS	ENSG00000110063	-0.255742	0.00151521	FALSE	FALSE	FALSE
CCKBR	ENSG00000110148	0.966083	0.000959155	FALSE	FALSE	FALSE
APOA5	ENSG00000110243	1.19436	1.89879e-05	FALSE	FALSE	FALSE
APOC3	ENSG00000110245	1.5644	1.63207e-05	FALSE	FALSE	FALSE
UPK2	ENSG00000110375	1.30831	1.11701e-12	FALSE	FALSE	FALSE
SLC22A18	ENSG00000110628	-0.292917	0.00488916	FALSE	FALSE	FALSE
CAPRIN2	ENSG00000110888	0.234215	0.000853556	FALSE	FALSE	FALSE
WNT5B	ENSG00000111186	-0.549782	0.000832313	FALSE	FALSE	FALSE
CUX2	ENSG00000111249	0.768746	0.000761002	FALSE	FALSE	FALSE
ALDH2	ENSG00000111275	-0.389482	0.000235949	FALSE	FALSE	FALSE
ENDOU	ENSG00000111405	0.578356	0.000905459	FALSE	FALSE	FALSE
AICDA	ENSG00000111732	0.690936	0.0083959	FALSE	FALSE	FALSE
RFX4	ENSG00000111783	0.716807	0.00454708	FALSE	FALSE	FALSE
FAM184A	ENSG00000111879	0.420285	0.00613062	FALSE	FALSE	FALSE
TULP1	ENSG00000112041	0.480803	0.00273176	FALSE	FALSE	FALSE
SIM1	ENSG00000112246	1.04765	0.000250759	FALSE	FALSE	FALSE
COL9A1	ENSG00000112280	0.638057	0.00783622	FALSE	FALSE	FALSE
B3GAT2	ENSG00000112309	0.309334	0.00223414	FALSE	FALSE	FALSE
SLC17A2	ENSG00000112337	1.02339	0.00536529	FALSE	FALSE	FALSE
UNC93A	ENSG00000112494	1.40786	2.1175e-06	FALSE	FALSE	FALSE
TTK	ENSG00000112742	0.313148	0.00364055	FALSE	TRUE	FALSE
HSPA9	ENSG00000113013	-0.152841	0.0095565	FALSE	FALSE	FALSE
CDH9	ENSG00000113100	1.71264	2.96857e-05	FALSE	FALSE	FALSE
PCDHB3	ENSG00000113205	0.731745	5.67035e-05	FALSE	FALSE	FALSE
PCDHB6	ENSG00000113211	0.607653	0.00123454	FALSE	FALSE	FALSE
GABRG2	ENSG00000113327	2.75265	1.36871e-13	FALSE	FALSE	FALSE
SLC27A6	ENSG00000113396	0.712669	0.00734843	FALSE	FALSE	FALSE
AGXT2	ENSG00000113492	0.795497	0.00925334	FALSE	FALSE	FALSE
CSPG5	ENSG00000114646	0.499155	0.00031694	FALSE	FALSE	FALSE
ACVR2B	ENSG00000114739	0.231935	0.00466008	FALSE	FALSE	FALSE
PEX5L	ENSG00000114757	0.750667	3.60359e-05	FALSE	FALSE	FALSE
AADAC	ENSG00000114771	0.815085	0.00279502	FALSE	FALSE	FALSE
IL1A	ENSG00000115008	0.703401	0.00139886	FALSE	FALSE	FALSE
SLC30A3	ENSG00000115194	0.837761	1.68556e-05	FALSE	FALSE	FALSE
APC2	ENSG00000115266	0.298925	0.00125849	FALSE	FALSE	FALSE
COQ10B	ENSG00000115520	-0.167438	0.00151362	FALSE	FALSE	FALSE
DLX2	ENSG00000115844	1.03726	1.68915e-05	FALSE	FALSE	FALSE
ARID3A	ENSG00000116017	0.417959	0.000242834	FALSE	FALSE	FALSE
SPR	ENSG00000116096	-0.251008	0.00141566	FALSE	FALSE	FALSE
SCP2	ENSG00000116171	-0.161934	0.00799286	FALSE	FALSE	FALSE
S100PBP	ENSG00000116497	0.160982	0.00111599	FALSE	FALSE	FALSE
KIF17	ENSG00000117245	0.333489	0.00307198	FALSE	FALSE	FALSE
MPL	ENSG00000117400	0.304227	0.00879161	FALSE	FALSE	FALSE
CCDC181	ENSG00000117477	0.429862	0.00328362	FALSE	FALSE	FALSE
MROH9	ENSG00000117501	0.718993	0.0032517	FALSE	FALSE	FALSE
SERPINC1	ENSG00000117601	0.822899	3.37971e-06	FALSE	FALSE	FALSE
STMN1	ENSG00000117632	0.262313	0.00470812	FALSE	FALSE	FALSE
APOA1	ENSG00000118137	1.2605	1.3197e-10	FALSE	FALSE	FALSE
KPTN	ENSG00000118162	0.195223	0.00544632	FALSE	FALSE	FALSE
TTR	ENSG00000118271	0.857536	0.00854734	FALSE	FALSE	FALSE
ATP10B	ENSG00000118322	-0.685441	0.00230088	FALSE	FALSE	FALSE
CNR1	ENSG00000118432	0.644725	0.00164244	FALSE	FALSE	FALSE
PMFBP1	ENSG00000118557	0.314689	0.00674121	FALSE	FALSE	FALSE
OLFM3	ENSG00000118733	1.07982	0.00955869	FALSE	FALSE	FALSE
SPP1	ENSG00000118785	-0.53134	0.00938729	FALSE	FALSE	FALSE
RARRES1	ENSG00000118849	-0.677928	0.000213444	FALSE	FALSE	FALSE
KLF9	ENSG00000119138	-0.259116	0.00605401	FALSE	FALSE	FALSE
TRIM67	ENSG00000119283	0.573462	0.00525964	FALSE	FALSE	FALSE
BSPRY	ENSG00000119411	-0.388687	0.00734843	FALSE	FALSE	FALSE
PGF	ENSG00000119630	0.408465	0.0040254	FALSE	FALSE	FALSE
ALDH6A1	ENSG00000119711	-0.285859	0.00174998	FALSE	FALSE	FALSE
DNMT3A	ENSG00000119772	0.199611	0.00384307	TRUE	FALSE	FALSE
EPCAM	ENSG00000119888	-0.583658	0.000384551	FALSE	FALSE	FALSE
ELOVL3	ENSG00000119915	0.717777	2.43143e-05	FALSE	FALSE	FALSE
GOT1	ENSG00000120053	-0.232322	0.00558438	FALSE	FALSE	FALSE
GRIA2	ENSG00000120251	1.44577	2.44461e-08	FALSE	FALSE	FALSE
SOHLH2	ENSG00000120669	0.931242	0.000657769	FALSE	FALSE	FALSE
RNF170	ENSG00000120925	-0.169918	0.00909796	FALSE	FALSE	FALSE
CEP89	ENSG00000121289	0.203112	0.000956897	FALSE	FALSE	FALSE
RGSL1	ENSG00000121446	1.34667	2.0902e-08	FALSE	FALSE	FALSE
KIAA0087	ENSG00000122548	0.650594	0.00395426	FALSE	FALSE	FALSE
NPY	ENSG00000122585	1.50996	2.55197e-05	FALSE	FALSE	FALSE
PHF24	ENSG00000122733	0.548821	0.00356174	FALSE	FALSE	FALSE
IL13RA2	ENSG00000123496	0.67335	0.00197601	FALSE	FALSE	FALSE
GPR83	ENSG00000123901	0.500272	0.00582638	FALSE	FALSE	FALSE
DAW1	ENSG00000123977	0.983669	0.000182704	FALSE	FALSE	FALSE
FAM210B	ENSG00000124098	-0.206734	0.00783745	FALSE	FALSE	FALSE
PLCG1	ENSG00000124181	0.203211	0.00176515	TRUE	FALSE	FALSE
MAGEA10	ENSG00000124260	3.09494	1.59103e-12	FALSE	FALSE	FALSE
GRM4	ENSG00000124493	1.0425	1.12619e-05	FALSE	FALSE	FALSE
APOBEC2	ENSG00000124701	0.513167	0.00294716	FALSE	FALSE	FALSE
DNAH8	ENSG00000124721	0.687755	0.000171641	FALSE	FALSE	FALSE
RAB17	ENSG00000124839	-0.383191	0.00151362	FALSE	FALSE	FALSE
PIWIL1	ENSG00000125207	0.887963	0.000342494	FALSE	TRUE	FALSE
SOX21	ENSG00000125285	-0.827032	0.00749135	FALSE	FALSE	FALSE
TEKT3	ENSG00000125409	0.652295	5.44348e-05	FALSE	FALSE	FALSE
CITED1	ENSG00000125931	0.568666	0.00273176	FALSE	FALSE	FALSE
FAM83C	ENSG00000125998	1.67705	2.70635e-12	FALSE	FALSE	FALSE
TSKS	ENSG00000126467	0.568588	0.00341215	FALSE	FALSE	FALSE
SSX1	ENSG00000126752	1.34132	0.00420293	FALSE	FALSE	FALSE
ZC4H2	ENSG00000126970	0.297398	0.00751443	FALSE	FALSE	FALSE
OMD	ENSG00000127083	-0.700013	0.00314145	FALSE	FALSE	FALSE
IL17B	ENSG00000127743	0.578229	0.000333691	FALSE	FALSE	FALSE
VIL1	ENSG00000127831	-0.856633	0.000665111	FALSE	FALSE	FALSE
ECHS1	ENSG00000127884	-0.20456	0.00312101	FALSE	FALSE	FALSE
SPINK2	ENSG00000128040	0.611336	0.00686454	FALSE	FALSE	FALSE
C22orf24	ENSG00000128254	0.330402	0.0038352	FALSE	FALSE	FALSE
IGLL1	ENSG00000128322	0.799531	0.00454708	FALSE	FALSE	FALSE
IVD	ENSG00000128928	-0.239666	0.0011079	FALSE	FALSE	FALSE
BBOX1	ENSG00000129151	0.647467	0.00417814	FALSE	FALSE	FALSE
KCNC1	ENSG00000129159	0.531207	0.00670609	FALSE	FALSE	FALSE
TPH1	ENSG00000129167	0.616223	0.000114028	FALSE	FALSE	FALSE
SOX15	ENSG00000129194	0.439731	0.00151521	FALSE	FALSE	FALSE
REEP5	ENSG00000129625	-0.156907	0.00801864	FALSE	FALSE	FALSE
KIF1A	ENSG00000130294	0.913785	0.000485843	FALSE	FALSE	FALSE
ACSBG2	ENSG00000130377	0.387328	0.00361539	FALSE	FALSE	FALSE
HRC	ENSG00000130528	0.430812	0.00847321	FALSE	FALSE	FALSE
CYP2E1	ENSG00000130649	0.526866	0.00299053	FALSE	FALSE	FALSE
SLC7A10	ENSG00000130876	0.639588	0.000453503	FALSE	FALSE	FALSE
HSD17B3	ENSG00000130948	0.49091	0.00653539	FALSE	FALSE	FALSE
C1QL1	ENSG00000131094	0.792358	0.000125454	FALSE	FALSE	FALSE
GFAP	ENSG00000131095	0.780459	0.000303769	FALSE	FALSE	FALSE
PYY	ENSG00000131096	0.936001	2.9938e-06	FALSE	FALSE	FALSE
PSMC3IP	ENSG00000131470	0.195769	0.00820173	FALSE	TRUE	FALSE
G6PC	ENSG00000131482	0.999828	0.00055078	FALSE	FALSE	FALSE
PDHA1	ENSG00000131828	-0.19975	0.00217916	FALSE	FALSE	FALSE
MCCC2	ENSG00000131844	-0.194447	0.00546322	FALSE	FALSE	FALSE
C19orf12	ENSG00000131943	0.212947	0.00123038	FALSE	FALSE	FALSE
FAAP24	ENSG00000131944	0.275955	0.00040785	FALSE	FALSE	FALSE
C19orf57	ENSG00000132016	0.348881	0.00167147	FALSE	FALSE	FALSE
RTBDN	ENSG00000132026	0.849665	0.0011192	FALSE	FALSE	FALSE
LINC00470	ENSG00000132204	1.49256	3.75198e-07	FALSE	FALSE	FALSE
SEC61G	ENSG00000132432	0.228155	0.0058883	FALSE	FALSE	FALSE
RIDA	ENSG00000132541	-0.289055	0.00249728	FALSE	FALSE	FALSE
HAPLN2	ENSG00000132702	0.74742	0.000106488	FALSE	FALSE	FALSE
NASP	ENSG00000132780	0.20154	0.00269285	FALSE	FALSE	FALSE
PDE6A	ENSG00000132915	0.518101	0.000531793	FALSE	FALSE	FALSE
RNF17	ENSG00000132972	0.962169	0.00361452	FALSE	FALSE	FALSE
MYH8	ENSG00000133020	1.10225	0.000707489	FALSE	FALSE	FALSE
STOML3	ENSG00000133115	0.944311	0.00159967	FALSE	FALSE	FALSE
WNT2B	ENSG00000134245	0.439371	0.00231956	FALSE	FALSE	FALSE
CRB1	ENSG00000134376	0.530723	0.000646304	FALSE	FALSE	FALSE
CFHR5	ENSG00000134389	2.3055	1.1645e-08	FALSE	FALSE	FALSE
SOX3	ENSG00000134595	1.42904	0.000394937	FALSE	FALSE	FALSE
DSG1	ENSG00000134760	0.822971	0.00732068	FALSE	FALSE	FALSE
DTNA	ENSG00000134769	0.468734	0.00146403	FALSE	FALSE	FALSE
TCN1	ENSG00000134827	-1.30666	2.55197e-05	FALSE	FALSE	FALSE
CLDN10	ENSG00000134873	-0.896296	0.00118035	FALSE	FALSE	FALSE
SDS	ENSG00000135094	-0.429224	0.00938314	FALSE	FALSE	FALSE
KHDC1	ENSG00000135314	0.3712	0.00692756	FALSE	FALSE	FALSE
EPHA7	ENSG00000135333	0.80128	0.00356864	FALSE	FALSE	FALSE
MAP3K7	ENSG00000135341	0.128558	0.00476139	FALSE	FALSE	FALSE
GDF11	ENSG00000135414	0.290995	0.00329165	FALSE	FALSE	FALSE
GLS2	ENSG00000135423	-0.358897	0.00306427	FALSE	FALSE	FALSE
SPDYE1	ENSG00000136206	0.260822	0.00686109	FALSE	FALSE	FALSE
IGF2BP3	ENSG00000136231	0.668406	0.00437334	FALSE	FALSE	FALSE
DGKB	ENSG00000136267	0.729932	0.000302007	FALSE	FALSE	FALSE
SCN2A	ENSG00000136531	0.691353	0.00198534	FALSE	FALSE	FALSE
IL36G	ENSG00000136688	1.01929	0.000186078	FALSE	FALSE	FALSE
SLC31A1	ENSG00000136868	-0.227558	0.00140747	FALSE	FALSE	FALSE
ALDOB	ENSG00000136872	-0.686057	0.00262644	FALSE	FALSE	FALSE
FPGS	ENSG00000136877	-0.191707	0.00151362	FALSE	FALSE	FALSE
CTSV	ENSG00000136943	0.490656	0.00209616	FALSE	FALSE	FALSE
IL11RA	ENSG00000137070	0.358298	0.000186078	FALSE	FALSE	FALSE
ALDH1B1	ENSG00000137124	-0.315398	0.000993935	FALSE	FALSE	FALSE
TUBB2B	ENSG00000137285	0.540297	0.00938729	FALSE	FALSE	FALSE
PGBD1	ENSG00000137338	0.245767	0.00480349	FALSE	FALSE	FALSE
TMPRSS4	ENSG00000137648	-0.638699	0.00918632	FALSE	FALSE	FALSE
MMP7	ENSG00000137673	-0.682022	0.00854268	FALSE	FALSE	FALSE
FDX1	ENSG00000137714	-0.194386	0.00328362	FALSE	FALSE	FALSE
UNC13C	ENSG00000137766	0.962943	0.000215453	FALSE	FALSE	FALSE
BRDT	ENSG00000137948	1.84767	5.23903e-12	FALSE	TRUE	FALSE
TET1	ENSG00000138336	0.315156	0.00775234	FALSE	FALSE	FALSE
MYPN	ENSG00000138347	0.677289	0.00681228	FALSE	FALSE	FALSE
CHRNA1	ENSG00000138435	0.658735	0.00198818	FALSE	FALSE	FALSE
GPAT3	ENSG00000138678	-0.446142	0.00247121	FALSE	FALSE	FALSE
CENPE	ENSG00000138778	0.282651	0.00872021	FALSE	FALSE	FALSE
RGS3	ENSG00000138835	-0.198175	0.00402762	TRUE	FALSE	FALSE
COL2A1	ENSG00000139219	1.06007	0.000104042	FALSE	FALSE	FALSE
LUM	ENSG00000139329	-0.659902	0.000420461	FALSE	FALSE	FALSE
ASCL1	ENSG00000139352	1.91488	8.00071e-11	FALSE	FALSE	FALSE
MDGA2	ENSG00000139915	1.36562	1.4364e-05	FALSE	FALSE	FALSE
SYT16	ENSG00000139973	0.678097	0.00298112	FALSE	FALSE	FALSE
LMAN1L	ENSG00000140506	0.815525	0.0044442	FALSE	FALSE	FALSE
UQCRC2	ENSG00000140740	-0.150645	0.00880278	FALSE	FALSE	FALSE
MYLK3	ENSG00000140795	0.478702	0.0051067	FALSE	FALSE	FALSE
ABCC12	ENSG00000140798	1.28128	7.54207e-05	FALSE	FALSE	FALSE
CLEC18B	ENSG00000140839	0.524965	0.00129101	FALSE	FALSE	FALSE
ADAMTS18	ENSG00000140873	0.578186	0.00854268	FALSE	FALSE	FALSE
RPL3L	ENSG00000140986	0.867883	5.76736e-09	FALSE	FALSE	FALSE
ZNF287	ENSG00000141040	0.248776	0.00261998	FALSE	FALSE	FALSE
UNC45B	ENSG00000141161	0.617885	0.00123882	FALSE	FALSE	FALSE
ASXL3	ENSG00000141431	0.623577	0.00199901	FALSE	FALSE	FALSE
NARF	ENSG00000141562	0.156448	0.0059381	FALSE	FALSE	FALSE
ERBB2	ENSG00000141736	-0.428319	0.000333691	TRUE	FALSE	FALSE
GRB7	ENSG00000141738	-0.517474	0.000352789	FALSE	FALSE	FALSE
MIEN1	ENSG00000141741	-0.366385	0.000812801	FALSE	FALSE	FALSE
SOD1	ENSG00000142168	-0.196015	0.0051067	FALSE	FALSE	FALSE
ARHGEF19	ENSG00000142632	0.350384	0.000180682	FALSE	FALSE	FALSE
CELA3A	ENSG00000142789	1.32486	0.000329632	FALSE	FALSE	FALSE
ATP1B1	ENSG00000143153	-0.30902	0.00758487	FALSE	FALSE	FALSE
XCL1	ENSG00000143184	0.584174	0.000505537	FALSE	FALSE	FALSE
CRABP2	ENSG00000143320	-0.608871	0.000384551	FALSE	FALSE	FALSE
LHX9	ENSG00000143355	0.77588	0.00588839	FALSE	FALSE	FALSE
CTSK	ENSG00000143387	-0.556869	0.000280035	FALSE	FALSE	FALSE
	ENSG00000143429	0.317441	0.00979829	FALSE	FALSE	FALSE
SEMA6C	ENSG00000143434	0.309569	0.00707837	FALSE	FALSE	FALSE
NUP210L	ENSG00000143552	0.440753	0.00797202	FALSE	FALSE	FALSE
SYT2	ENSG00000143858	0.540545	0.000726046	FALSE	FALSE	FALSE
REG3G	ENSG00000143954	2.37635	2.49956e-07	FALSE	FALSE	FALSE
FBLN7	ENSG00000144152	0.483471	0.000333691	FALSE	FALSE	FALSE
TMEFF2	ENSG00000144339	0.844926	0.00090678	FALSE	FALSE	FALSE
DLX1	ENSG00000144355	0.627041	0.00797696	FALSE	FALSE	FALSE
ABCA12	ENSG00000144452	0.67518	0.000959155	FALSE	FALSE	FALSE
CPNE9	ENSG00000144550	0.384774	0.00779933	FALSE	FALSE	FALSE
CSRNP1	ENSG00000144655	-0.259047	0.00823799	FALSE	FALSE	FALSE
LRIG1	ENSG00000144749	-0.275731	0.0058883	FALSE	FALSE	FALSE
ADGRG7	ENSG00000144820	1.13647	0.00476139	FALSE	FALSE	FALSE
TAGLN3	ENSG00000144834	1.19504	8.90311e-08	FALSE	FALSE	FALSE
CCDC39	ENSG00000145075	0.294173	0.00951987	FALSE	FALSE	FALSE
AHSG	ENSG00000145192	1.22927	8.96279e-06	FALSE	FALSE	FALSE
CDH18	ENSG00000145526	1.38608	1.66017e-05	FALSE	FALSE	FALSE
SKP2	ENSG00000145604	0.349375	7.05831e-07	FALSE	FALSE	FALSE
UGT3A1	ENSG00000145626	1.69981	1.49406e-07	FALSE	FALSE	FALSE
ADAMTS19	ENSG00000145808	1.08833	0.000594045	FALSE	FALSE	FALSE
LECT2	ENSG00000145826	1.15488	0.00070112	FALSE	FALSE	FALSE
NA	ENSG00000145965	0.434939	0.000273455	FALSE	FALSE	FALSE
FAM217A	ENSG00000145975	0.464272	0.00308628	FALSE	FALSE	FALSE
CDKAL1	ENSG00000145996	0.179943	0.00273675	FALSE	FALSE	FALSE
PSD2	ENSG00000146005	0.504054	0.00219307	FALSE	FALSE	FALSE
LRRTM2	ENSG00000146006	0.477162	0.00110801	FALSE	FALSE	FALSE
NFKBIE	ENSG00000146232	-0.240674	0.0048395	FALSE	FALSE	FALSE
MMS22L	ENSG00000146263	0.207806	0.00939007	FALSE	FALSE	FALSE
GABRR1	ENSG00000146276	0.96973	7.71566e-05	FALSE	FALSE	FALSE
CLVS2	ENSG00000146352	1.18123	0.00029743	FALSE	FALSE	FALSE
EGFR	ENSG00000146648	0.451828	0.00151643	TRUE	FALSE	FALSE
SSC4D	ENSG00000146700	0.43015	0.00224488	FALSE	FALSE	FALSE
ZAN	ENSG00000146839	1.07009	3.35056e-06	FALSE	FALSE	FALSE
SNX12	ENSG00000147164	-0.120391	0.00523517	FALSE	FALSE	FALSE
ZNF711	ENSG00000147180	0.44721	0.00710163	FALSE	FALSE	FALSE
RIPPLY1	ENSG00000147223	0.83368	2.73324e-05	FALSE	FALSE	FALSE
HTR2C	ENSG00000147246	2.73085	5.26207e-16	FALSE	FALSE	FALSE
MAGEA4	ENSG00000147381	1.56311	0.00861049	FALSE	FALSE	FALSE
SNTG1	ENSG00000147481	0.968098	0.00984966	FALSE	FALSE	FALSE
PLPPR1	ENSG00000148123	0.922958	0.000404365	FALSE	FALSE	FALSE
ALAD	ENSG00000148218	-0.176069	0.00584093	FALSE	FALSE	FALSE
SLC25A25	ENSG00000148339	-0.260399	0.00500565	FALSE	FALSE	FALSE
LCN2	ENSG00000148346	-0.994216	5.24796e-05	FALSE	FALSE	FALSE
SLC39A12	ENSG00000148482	0.773209	0.00616884	FALSE	FALSE	FALSE
ANKRD30A	ENSG00000148513	1.97756	1.52425e-06	FALSE	FALSE	FALSE
RGR	ENSG00000148604	1.08059	0.00401969	FALSE	FALSE	FALSE
ANKRD1	ENSG00000148677	0.785196	0.00138117	FALSE	FALSE	FALSE
VAX1	ENSG00000148704	1.21023	0.000377258	FALSE	FALSE	FALSE
NKX6-2	ENSG00000148826	2.17218	1.73558e-05	FALSE	FALSE	FALSE
CCDC81	ENSG00000149201	0.319499	0.00415078	FALSE	FALSE	FALSE
DRD2	ENSG00000149295	0.712868	0.00143904	FALSE	FALSE	FALSE
SLC22A8	ENSG00000149452	1.45123	7.61411e-06	FALSE	FALSE	FALSE
CNBD2	ENSG00000149646	0.294975	0.00870888	FALSE	FALSE	FALSE
HMGA2	ENSG00000149948	1.49541	2.99137e-10	FALSE	FALSE	FALSE
CNTN5	ENSG00000149972	1.64852	6.6596e-12	FALSE	FALSE	FALSE
PCDH15	ENSG00000150275	1.41701	6.4298e-09	FALSE	FALSE	FALSE
LYPD1	ENSG00000150551	0.608154	0.000350424	FALSE	FALSE	FALSE
KCNA6	ENSG00000151079	0.546787	0.00882843	FALSE	FALSE	FALSE
CCDC3	ENSG00000151468	0.480276	0.000356376	FALSE	FALSE	FALSE
ITIH2	ENSG00000151655	0.535917	0.00727111	FALSE	FALSE	FALSE
TMEM45B	ENSG00000151715	-0.484492	0.00262644	FALSE	FALSE	FALSE
SLC35F4	ENSG00000151812	0.577357	0.00309926	FALSE	FALSE	FALSE
BAG3	ENSG00000151929	-0.269112	0.00192693	FALSE	FALSE	FALSE
ASTN1	ENSG00000152092	0.904813	0.000157696	FALSE	FALSE	FALSE
GRID2	ENSG00000152208	0.924162	0.00697479	FALSE	FALSE	FALSE
RIT2	ENSG00000152214	1.51481	1.40389e-05	FALSE	FALSE	FALSE
TRIM36	ENSG00000152503	0.563441	0.000112684	FALSE	FALSE	FALSE
SPEF2	ENSG00000152582	0.372114	0.00172395	FALSE	FALSE	FALSE
GRM1	ENSG00000152822	0.879487	1.16318e-06	FALSE	FALSE	FALSE
CNTNAP4	ENSG00000152910	0.939312	0.00653539	FALSE	FALSE	FALSE
ZIC1	ENSG00000152977	0.937312	0.00913082	FALSE	FALSE	FALSE
FAM81B	ENSG00000153347	0.738714	0.00123622	FALSE	FALSE	FALSE
PLEKHG4B	ENSG00000153404	0.622933	0.00328362	FALSE	FALSE	FALSE
SPHKAP	ENSG00000153820	1.38219	8.35953e-05	FALSE	FALSE	FALSE
ZNF599	ENSG00000153896	0.23715	0.000420461	FALSE	FALSE	FALSE
TMPRSS15	ENSG00000154646	1.42473	1.70495e-05	FALSE	FALSE	FALSE
WNT7A	ENSG00000154764	0.828721	0.00154668	FALSE	FALSE	FALSE
CCDC144CP	ENSG00000154898	0.470106	0.00729258	FALSE	FALSE	FALSE
EME1	ENSG00000154920	0.276247	0.00640404	FALSE	TRUE	FALSE
2018-09-14	ENSG00000154997	2.89236	5.75307e-19	FALSE	FALSE	FALSE
CNTNAP5	ENSG00000155052	1.05053	0.00113537	FALSE	FALSE	FALSE
AK9	ENSG00000155085	0.213199	0.00909796	FALSE	FALSE	FALSE
MAGEC1	ENSG00000155495	2.72237	2.00007e-09	FALSE	FALSE	FALSE
ZKSCAN2	ENSG00000155592	0.166456	0.00909796	FALSE	FALSE	FALSE
ALS2CR12	ENSG00000155749	0.624468	1.21461e-07	FALSE	FALSE	FALSE
MAGEA8	ENSG00000156009	1.81663	8.0926e-15	FALSE	FALSE	FALSE
GPR61	ENSG00000156097	0.392447	0.00131485	FALSE	FALSE	FALSE
ADAMTS3	ENSG00000156140	0.480497	0.00410474	FALSE	FALSE	FALSE
NAA11	ENSG00000156269	1.95359	3.78646e-06	FALSE	FALSE	FALSE
SORCS3	ENSG00000156395	1.15234	0.000584889	FALSE	FALSE	FALSE
PCDH1	ENSG00000156453	-0.306851	0.00381979	FALSE	FALSE	FALSE
FBXO43	ENSG00000156509	0.333692	0.0082173	FALSE	TRUE	FALSE
UNC5D	ENSG00000156687	1.75066	1.46045e-10	FALSE	FALSE	FALSE
C1orf158	ENSG00000157330	0.87299	0.00557498	FALSE	FALSE	FALSE
CLEC18C	ENSG00000157335	1.03968	2.97201e-06	FALSE	FALSE	FALSE
DPYSL5	ENSG00000157851	2.0292	2.26107e-14	FALSE	FALSE	FALSE
TMSB15A	ENSG00000158164	0.79615	9.5999e-06	FALSE	FALSE	FALSE
PAGE5	ENSG00000158639	0.883758	0.00983124	FALSE	FALSE	FALSE
MPZ	ENSG00000158887	0.572951	6.91507e-05	FALSE	FALSE	FALSE
IGF2BP1	ENSG00000159217	1.07331	1.70495e-05	FALSE	FALSE	FALSE
CBR1	ENSG00000159228	-0.346301	0.00209616	FALSE	FALSE	FALSE
CELF3	ENSG00000159409	0.911135	2.87041e-05	FALSE	FALSE	FALSE
CCDC17	ENSG00000159588	0.389773	0.00173696	FALSE	FALSE	FALSE
DRC7	ENSG00000159625	0.594863	0.00131485	FALSE	FALSE	FALSE
ZNF221	ENSG00000159905	0.29561	0.00697479	FALSE	FALSE	FALSE
IQCC	ENSG00000160051	0.204487	0.00114719	FALSE	FALSE	FALSE
ANKLE1	ENSG00000160117	0.372133	0.00676127	FALSE	TRUE	FALSE
TFF3	ENSG00000160180	-1.06299	7.61411e-06	FALSE	FALSE	FALSE
AIRE	ENSG00000160224	0.662012	0.00379953	FALSE	FALSE	FALSE
ZNF208	ENSG00000160321	0.652267	0.00112363	FALSE	FALSE	FALSE
SPTBN4	ENSG00000160460	0.421861	0.00584093	FALSE	FALSE	FALSE
NLRP4	ENSG00000160505	1.25832	1.87202e-05	FALSE	FALSE	FALSE
LRRC71	ENSG00000160838	0.575663	0.00315944	FALSE	FALSE	FALSE
PTGER1	ENSG00000160951	0.678438	0.000242585	FALSE	FALSE	FALSE
PGAP3	ENSG00000161395	-0.33758	0.00212045	FALSE	FALSE	FALSE
DCD	ENSG00000161634	1.70963	0.000345642	FALSE	FALSE	FALSE
FAM171A2	ENSG00000161682	0.366497	0.00882735	FALSE	FALSE	FALSE
KRT84	ENSG00000161849	1.35008	0.000137037	FALSE	FALSE	FALSE
IP6K3	ENSG00000161896	1.10324	2.83236e-07	FALSE	FALSE	FALSE
ALOX15	ENSG00000161905	-0.978816	1.70495e-05	FALSE	FALSE	FALSE
ZG16B	ENSG00000162078	-0.587668	0.0051067	FALSE	FALSE	FALSE
SHANK2	ENSG00000162105	0.468844	0.00249728	FALSE	FALSE	FALSE
FGF19	ENSG00000162344	1.47521	9.13023e-06	FALSE	FALSE	FALSE
ELAVL4	ENSG00000162374	0.54308	0.00547947	FALSE	FALSE	FALSE
AKR7A3	ENSG00000162482	-0.474107	0.00540909	FALSE	FALSE	FALSE
IL23R	ENSG00000162594	0.583963	0.00560735	FALSE	FALSE	FALSE
HFM1	ENSG00000162669	0.526212	0.00203091	FALSE	TRUE	FALSE
KCNT2	ENSG00000162687	0.546774	0.00126665	FALSE	FALSE	FALSE
KCNJ9	ENSG00000162728	0.745588	6.08514e-06	FALSE	FALSE	FALSE
C1orf74	ENSG00000162757	0.281902	0.000186078	FALSE	FALSE	FALSE
PIGR	ENSG00000162896	-0.95284	1.7255e-05	FALSE	FALSE	FALSE
NEUROD1	ENSG00000162992	1.82369	8.90358e-07	FALSE	FALSE	FALSE
WDCP	ENSG00000163026	0.160708	0.00473074	FALSE	FALSE	FALSE
ANKRD30BL	ENSG00000163046	0.890776	0.00852253	FALSE	FALSE	FALSE
TEKT4	ENSG00000163060	1.01774	1.12456e-05	FALSE	FALSE	FALSE
MSX1	ENSG00000163132	0.54008	7.71566e-05	FALSE	FALSE	FALSE
IVL	ENSG00000163207	1.37225	0.000244919	FALSE	FALSE	FALSE
PGLYRP4	ENSG00000163218	0.718656	0.00724158	FALSE	FALSE	FALSE
GABRB1	ENSG00000163288	1.11766	8.91308e-05	FALSE	FALSE	FALSE
FAM19A4	ENSG00000163377	0.986481	0.000939657	FALSE	FALSE	FALSE
CCKAR	ENSG00000163394	1.14806	0.00231593	FALSE	FALSE	FALSE
ELF3	ENSG00000163435	-0.485855	4.87279e-05	TRUE	FALSE	FALSE
EFHB	ENSG00000163576	0.457984	0.00121983	FALSE	FALSE	FALSE
COX18	ENSG00000163626	-0.204104	0.00031694	FALSE	FALSE	FALSE
CCDC158	ENSG00000163749	0.433897	0.00724158	FALSE	FALSE	FALSE
SLC6A20	ENSG00000163817	-0.841792	0.000345642	FALSE	FALSE	FALSE
IGF2BP2-AS1	ENSG00000163915	0.662921	0.00462318	FALSE	FALSE	FALSE
CLDN19	ENSG00000164007	0.951814	0.000555389	FALSE	FALSE	FALSE
INTU	ENSG00000164066	0.240962	0.00695747	FALSE	FALSE	FALSE
CAMKV	ENSG00000164076	0.998969	0.000203605	FALSE	FALSE	FALSE
ICE1	ENSG00000164151	0.155664	0.00738455	FALSE	FALSE	FALSE
HTR4	ENSG00000164270	0.744351	0.00196535	FALSE	FALSE	FALSE
CDC20B	ENSG00000164287	1.01744	0.000131621	FALSE	FALSE	FALSE
SHROOM1	ENSG00000164403	-0.286112	0.00924393	FALSE	FALSE	FALSE
FABP7	ENSG00000164434	1.62042	2.55746e-06	FALSE	FALSE	FALSE
TXLNB	ENSG00000164440	0.543198	0.000107548	FALSE	FALSE	FALSE
TBXT	ENSG00000164458	1.45102	0.000114061	FALSE	FALSE	FALSE
MYOZ3	ENSG00000164591	0.472858	0.00415067	FALSE	FALSE	FALSE
SLC29A4	ENSG00000164638	0.48648	0.00202053	FALSE	FALSE	FALSE
CSMD3	ENSG00000164796	1.48686	1.37127e-08	FALSE	FALSE	FALSE
GPER1	ENSG00000164850	0.404418	0.00745021	FALSE	FALSE	FALSE
C9orf24	ENSG00000164972	0.560451	0.00257011	FALSE	FALSE	FALSE
FXN	ENSG00000165060	-0.175219	0.00672594	FALSE	FALSE	FALSE
NKX6-3	ENSG00000165066	1.27435	4.70529e-05	FALSE	FALSE	FALSE
CFAP47	ENSG00000165164	0.70482	0.00804388	FALSE	FALSE	FALSE
ARMC3	ENSG00000165309	0.640708	0.00824256	FALSE	FALSE	FALSE
FAT3	ENSG00000165323	0.844294	7.98889e-05	FALSE	FALSE	FALSE
LRFN5	ENSG00000165379	0.81407	0.000304012	FALSE	FALSE	FALSE
PHYHIPL	ENSG00000165443	0.796473	0.000186078	FALSE	FALSE	FALSE
GHITM	ENSG00000165678	-0.161271	0.00718015	FALSE	FALSE	FALSE
E2F7	ENSG00000165891	0.457856	0.000235154	FALSE	FALSE	FALSE
OTOGL	ENSG00000165899	0.905512	1.28514e-07	FALSE	FALSE	FALSE
LARGE2	ENSG00000165905	0.416687	0.00558739	FALSE	FALSE	FALSE
RAPSN	ENSG00000165917	0.565308	0.000820437	FALSE	FALSE	FALSE
AGBL2	ENSG00000165923	0.308498	0.0095565	FALSE	FALSE	FALSE
SERPINA12	ENSG00000165953	1.09556	0.000868707	FALSE	FALSE	FALSE
PASD1	ENSG00000166049	2.50949	1.04051e-05	FALSE	FALSE	FALSE
GLB1L3	ENSG00000166105	0.877982	0.000200502	FALSE	FALSE	FALSE
NA	ENSG00000166157	1.58829	0.000215453	FALSE	FALSE	FALSE
PCBD1	ENSG00000166228	-0.225022	0.00252594	FALSE	FALSE	FALSE
SYNPO2L	ENSG00000166317	0.809912	7.61411e-06	FALSE	FALSE	FALSE
WDR88	ENSG00000166359	0.388701	1.93986e-05	FALSE	FALSE	FALSE
CLEC3A	ENSG00000166509	1.40971	0.00105685	FALSE	FALSE	FALSE
SLC38A8	ENSG00000166558	1.00046	0.00162507	FALSE	FALSE	FALSE
SERPINB12	ENSG00000166634	1.18084	0.00466144	FALSE	FALSE	FALSE
ZCCHC18	ENSG00000166707	0.407585	0.00127249	FALSE	FALSE	FALSE
C18orf54	ENSG00000166845	0.26801	0.00470962	FALSE	FALSE	FALSE
NAT16	ENSG00000167011	0.663345	0.00990558	FALSE	FALSE	FALSE
LOXHD1	ENSG00000167210	0.500634	0.00480625	FALSE	FALSE	FALSE
ZNF23	ENSG00000167377	0.353787	1.0496e-05	FALSE	FALSE	FALSE
ATCAY	ENSG00000167654	0.961254	3.7692e-06	FALSE	FALSE	FALSE
GPT	ENSG00000167701	-0.451828	0.0044584	FALSE	FALSE	FALSE
KLK2	ENSG00000167751	0.865569	0.00199565	FALSE	FALSE	FALSE
SOAT2	ENSG00000167780	0.781468	0.000233946	FALSE	FALSE	FALSE
C3P1	ENSG00000167798	0.883389	0.006087	FALSE	FALSE	FALSE
CYP7A1	ENSG00000167910	0.811893	0.000517497	FALSE	FALSE	FALSE
ULK4	ENSG00000168038	0.28709	0.000174579	FALSE	FALSE	FALSE
NAALADL1	ENSG00000168060	0.367179	0.00185161	FALSE	FALSE	FALSE
HIST1H1E	ENSG00000168298	0.512905	0.00616914	FALSE	FALSE	FALSE
MOBP	ENSG00000168314	0.961634	2.27758e-08	FALSE	FALSE	FALSE
LGI3	ENSG00000168481	0.698352	0.00570479	FALSE	FALSE	FALSE
SFTPC	ENSG00000168484	0.908671	0.00430532	FALSE	FALSE	FALSE
HFE2	ENSG00000168509	0.788478	0.00529153	FALSE	FALSE	FALSE
UGT3A2	ENSG00000168671	1.02669	5.84268e-06	FALSE	FALSE	FALSE
AHCYL1	ENSG00000168710	-0.15269	0.00256996	FALSE	FALSE	FALSE
CXXC4	ENSG00000168772	0.461796	0.00939007	FALSE	FALSE	FALSE
FSTL5	ENSG00000168843	2.21893	2.70635e-12	FALSE	FALSE	FALSE
UPF3A	ENSG00000169062	0.165751	0.00756306	FALSE	FALSE	FALSE
GSG1L	ENSG00000169181	0.964079	1.01076e-05	FALSE	FALSE	FALSE
CXCL11	ENSG00000169248	0.627105	0.00228399	FALSE	FALSE	FALSE
IL1RAPL1	ENSG00000169306	0.6823	0.00381339	FALSE	FALSE	FALSE
UMOD	ENSG00000169344	1.25766	0.000966328	FALSE	FALSE	FALSE
HIC2	ENSG00000169635	0.289279	0.000503078	FALSE	FALSE	FALSE
RAC3	ENSG00000169750	0.322821	0.00720116	FALSE	FALSE	FALSE
GSX1	ENSG00000169840	1.4874	0.000760652	FALSE	FALSE	FALSE
MUC17	ENSG00000169876	1.8679	4.98599e-09	FALSE	FALSE	FALSE
WNT10B	ENSG00000169884	0.480331	0.0094281	FALSE	FALSE	FALSE
SYAP1	ENSG00000169895	-0.179113	0.00468727	FALSE	FALSE	FALSE
FRMPD4	ENSG00000169933	0.837245	0.00422381	FALSE	FALSE	FALSE
MYO7B	ENSG00000169994	0.57183	0.00353989	FALSE	FALSE	FALSE
ZPLD1	ENSG00000170044	1.08445	4.69122e-05	FALSE	FALSE	FALSE
FRMPD2	ENSG00000170324	0.636032	0.00529949	FALSE	FALSE	FALSE
SDR9C7	ENSG00000170426	1.24406	1.82967e-08	FALSE	FALSE	FALSE
KRT75	ENSG00000170454	1.61265	9.29601e-07	FALSE	FALSE	FALSE
KRT6C	ENSG00000170465	1.22912	0.00064603	FALSE	FALSE	FALSE
KRT83	ENSG00000170523	1.01554	0.000308853	FALSE	FALSE	FALSE
CDH2	ENSG00000170558	0.574714	0.00775234	FALSE	FALSE	FALSE
CAVIN4	ENSG00000170681	0.394395	0.0028887	FALSE	FALSE	FALSE
PSG6	ENSG00000170848	1.53437	0.000868749	FALSE	FALSE	FALSE
PLAC1	ENSG00000170965	0.6275	0.0095565	FALSE	FALSE	FALSE
KRT13	ENSG00000171401	-1.28845	0.000140014	FALSE	FALSE	FALSE
KRT20	ENSG00000171431	1.07597	0.00745021	FALSE	FALSE	FALSE
OTP	ENSG00000171540	0.951388	0.00026674	FALSE	FALSE	FALSE
FGG	ENSG00000171557	1.66956	3.0994e-05	FALSE	FALSE	FALSE
FGA	ENSG00000171560	2.13286	7.2568e-09	FALSE	FALSE	FALSE
FGB	ENSG00000171564	1.19635	0.00581574	FALSE	FALSE	FALSE
ZNF570	ENSG00000171827	0.244196	0.00756306	FALSE	FALSE	FALSE
REG3A	ENSG00000172016	3.59882	2.55245e-16	FALSE	FALSE	FALSE
GAP43	ENSG00000172020	0.956133	1.10305e-06	FALSE	FALSE	FALSE
SLC9C1	ENSG00000172139	0.471722	0.00510441	FALSE	FALSE	FALSE
TPSAB1	ENSG00000172236	-0.603713	0.00442804	FALSE	FALSE	FALSE
SUCLG2	ENSG00000172340	-0.218752	0.000795149	FALSE	FALSE	FALSE
RND1	ENSG00000172602	-0.386677	0.00616914	FALSE	FALSE	FALSE
PURG	ENSG00000172733	0.570582	0.00135268	FALSE	FALSE	FALSE
LVRN	ENSG00000172901	1.33035	1.39308e-18	FALSE	FALSE	FALSE
ARPP21	ENSG00000172995	1.23219	6.56942e-06	FALSE	FALSE	FALSE
ADAMTS20	ENSG00000173157	0.923732	0.00462778	FALSE	FALSE	FALSE
GLIPR1L1	ENSG00000173401	0.323723	0.00402762	FALSE	FALSE	FALSE
GPRC6A	ENSG00000173612	1.42924	0.000171855	FALSE	FALSE	FALSE
WFIKKN2	ENSG00000173714	0.729916	0.00442804	FALSE	FALSE	FALSE
TDRD12	ENSG00000173809	1.86431	4.95178e-22	FALSE	TRUE	FALSE
TIGD3	ENSG00000173825	0.343293	0.00344909	FALSE	FALSE	FALSE
CBX2	ENSG00000173894	0.422689	0.000958933	FALSE	FALSE	FALSE
SLCO4C1	ENSG00000173930	0.677658	0.00130874	FALSE	FALSE	FALSE
TLR10	ENSG00000174123	0.448127	0.00935941	FALSE	FALSE	FALSE
VWC2L	ENSG00000174453	0.634632	0.00758487	FALSE	FALSE	FALSE
ZCCHC12	ENSG00000174460	0.694756	0.000356376	FALSE	FALSE	FALSE
IGDCC3	ENSG00000174498	1.15827	2.61659e-07	FALSE	FALSE	FALSE
MFSD4A	ENSG00000174514	-0.467963	0.000868707	FALSE	FALSE	FALSE
MYO1H	ENSG00000174527	0.500407	0.000496906	FALSE	FALSE	FALSE
NPAS4	ENSG00000174576	0.710876	0.00252962	FALSE	FALSE	FALSE
NA	ENSG00000174595	0.739098	0.00260144	FALSE	FALSE	FALSE
PABPC5	ENSG00000174740	0.406873	0.005821	FALSE	FALSE	FALSE
PCP2	ENSG00000174788	0.459841	0.00238178	FALSE	FALSE	FALSE
CNIH2	ENSG00000174871	0.495711	2.73324e-05	FALSE	FALSE	FALSE
AMZ1	ENSG00000174945	0.640429	5.67035e-05	FALSE	FALSE	FALSE
ZIC4	ENSG00000174963	1.03665	0.00174998	FALSE	FALSE	FALSE
RAG2	ENSG00000175097	0.797524	0.00851433	FALSE	FALSE	FALSE
CADM2	ENSG00000175161	1.00368	7.08305e-05	FALSE	FALSE	FALSE
CSRP2	ENSG00000175183	0.394961	0.000456592	FALSE	FALSE	FALSE
TSGA10IP	ENSG00000175513	0.543814	0.00381495	FALSE	FALSE	FALSE
CIDEA	ENSG00000176194	1.08914	0.00110391	FALSE	FALSE	FALSE
LRRTM4	ENSG00000176204	0.938495	0.000682045	FALSE	FALSE	FALSE
RTTN	ENSG00000176225	0.225553	0.000764321	FALSE	FALSE	FALSE
EID2B	ENSG00000176401	0.385998	1.55797e-06	FALSE	FALSE	FALSE
DCAF4L2	ENSG00000176566	2.67254	3.22467e-06	FALSE	FALSE	FALSE
SOX11	ENSG00000176887	0.893677	0.00106904	FALSE	FALSE	FALSE
TCIM	ENSG00000176907	-0.55169	0.00031694	FALSE	FALSE	FALSE
	ENSG00000177359	0.84035	3.15467e-06	FALSE	FALSE	FALSE
NDUFV2	ENSG00000178127	-0.241853	0.000832313	FALSE	FALSE	FALSE
TMEM151B	ENSG00000178233	0.736276	5.50012e-05	FALSE	FALSE	FALSE
SLITRK1	ENSG00000178235	2.07514	2.52447e-12	FALSE	FALSE	FALSE
NEUROG2	ENSG00000178403	1.06413	0.00299118	FALSE	FALSE	FALSE
CEP295NL	ENSG00000178404	0.473584	0.00334489	FALSE	FALSE	FALSE
GDPD4	ENSG00000178795	0.6995	0.000442686	FALSE	FALSE	FALSE
EFCAB13	ENSG00000178852	0.273709	0.00323262	FALSE	FALSE	FALSE
FAM133A	ENSG00000179083	2.39534	4.58225e-21	FALSE	FALSE	FALSE
C12orf42	ENSG00000179088	0.566044	0.000565558	FALSE	FALSE	FALSE
CYC1	ENSG00000179091	-0.232471	0.00249728	FALSE	FALSE	FALSE
C10orf67	ENSG00000179133	0.537539	0.00886838	FALSE	FALSE	FALSE
ARID3B	ENSG00000179361	0.225652	0.00373867	FALSE	FALSE	FALSE
	ENSG00000179743	0.235346	0.00210324	FALSE	FALSE	FALSE
NLRP11	ENSG00000179873	0.837444	0.000601978	FALSE	FALSE	FALSE
NRXN1	ENSG00000179915	1.45495	2.56738e-10	FALSE	FALSE	FALSE
F2	ENSG00000180210	1.00646	1.98915e-05	FALSE	FALSE	FALSE
LINC00304	ENSG00000180422	0.5753	0.00990586	FALSE	FALSE	FALSE
TPRXL	ENSG00000180438	0.574475	0.00727111	FALSE	FALSE	FALSE
ZNF571	ENSG00000180479	0.209356	0.00820173	FALSE	FALSE	FALSE
ANKRD30B	ENSG00000180777	0.964435	0.00800563	FALSE	FALSE	FALSE
PPA1	ENSG00000180817	-0.207939	0.00143904	FALSE	FALSE	FALSE
BHLHE22	ENSG00000180828	-0.50737	0.00770707	FALSE	FALSE	FALSE
GPR62	ENSG00000180929	0.440923	0.00922078	FALSE	FALSE	FALSE
C1orf105	ENSG00000180999	0.773854	0.00117487	FALSE	FALSE	FALSE
NQO1	ENSG00000181019	-0.464139	0.00239015	FALSE	FALSE	FALSE
OFCC1	ENSG00000181355	0.992307	0.00217916	FALSE	FALSE	FALSE
SAGE1	ENSG00000181433	1.52014	9.49001e-05	FALSE	FALSE	FALSE
HKR1	ENSG00000181666	0.189574	0.00510122	FALSE	FALSE	FALSE
PLAG1	ENSG00000181690	0.438779	0.00456601	FALSE	FALSE	FALSE
CELF2-AS1	ENSG00000181800	0.665509	0.000193801	FALSE	FALSE	FALSE
SLC35C1	ENSG00000181830	-0.215848	0.00368378	FALSE	FALSE	FALSE
	ENSG00000181908	0.439446	0.000946547	FALSE	FALSE	FALSE
USH1G	ENSG00000182040	0.85765	0.000339283	FALSE	FALSE	FALSE
MGAT4C	ENSG00000182050	1.12883	1.39639e-05	FALSE	FALSE	FALSE
FAM153B	ENSG00000182230	0.701884	0.000576481	FALSE	FALSE	FALSE
C8orf33	ENSG00000182307	-0.177571	0.00684706	FALSE	FALSE	FALSE
KIAA2012	ENSG00000182329	0.506223	0.0098177	FALSE	FALSE	FALSE
ZNF804B	ENSG00000182348	1.38939	0.00117594	FALSE	FALSE	FALSE
CEP97	ENSG00000182504	0.171759	0.00695747	FALSE	FALSE	FALSE
CCNYL2	ENSG00000182632	1.04935	0.000312231	FALSE	FALSE	FALSE
NDN	ENSG00000182636	0.370572	0.00950952	FALSE	FALSE	FALSE
KCNB2	ENSG00000182674	0.941832	0.00105971	FALSE	FALSE	FALSE
GALR2	ENSG00000182687	0.680042	8.93663e-05	FALSE	FALSE	FALSE
MAFA	ENSG00000182759	1.10834	3.91444e-06	FALSE	FALSE	FALSE
MAGEB17	ENSG00000182798	0.743058	0.00442804	FALSE	FALSE	FALSE
GALNT9	ENSG00000182870	0.617595	0.008182	FALSE	FALSE	FALSE
RGS7	ENSG00000182901	1.00536	0.000121759	FALSE	FALSE	FALSE
RP1L1	ENSG00000183638	0.648214	6.84058e-05	FALSE	FALSE	FALSE
GUSBP1	ENSG00000183666	0.249778	0.000179944	FALSE	FALSE	FALSE
OPCML	ENSG00000183715	0.670172	0.00497731	FALSE	FALSE	FALSE
TRAIP	ENSG00000183763	0.217386	0.00523517	FALSE	FALSE	FALSE
KCTD16	ENSG00000183775	0.616454	0.000544894	FALSE	FALSE	FALSE
B3GALT5	ENSG00000183778	-0.741179	0.00368378	FALSE	FALSE	FALSE
EMILIN3	ENSG00000183798	0.639548	0.00119767	FALSE	FALSE	FALSE
ZNF730	ENSG00000183850	0.484733	0.00987534	FALSE	FALSE	FALSE
CNTN2	ENSG00000184144	1.2408	2.15768e-11	FALSE	FALSE	FALSE
KNTC1	ENSG00000184445	0.207812	0.00900987	FALSE	FALSE	FALSE
POU3F2	ENSG00000184486	2.73532	2.26755e-27	FALSE	FALSE	FALSE
NELL2	ENSG00000184613	0.74613	4.37608e-05	FALSE	FALSE	FALSE
CLDN6	ENSG00000184697	0.768969	0.00938729	FALSE	FALSE	FALSE
OSBP2	ENSG00000184792	0.386554	0.000264176	FALSE	FALSE	FALSE
NA	ENSG00000184825	0.671347	0.00106167	FALSE	FALSE	FALSE
NA	ENSG00000185044	0.661663	0.000183257	FALSE	FALSE	FALSE
NA	ENSG00000185087	0.873664	0.00880278	FALSE	FALSE	FALSE
LRRC37B	ENSG00000185158	0.160632	0.00899819	FALSE	FALSE	FALSE
MAGEA11	ENSG00000185247	1.80612	1.68556e-05	FALSE	FALSE	FALSE
NOTUM	ENSG00000185269	0.715869	0.00807857	FALSE	FALSE	FALSE
LINC00158	ENSG00000185433	0.635188	0.00264871	FALSE	FALSE	FALSE
BRCC3	ENSG00000185515	-0.191691	0.000217717	FALSE	FALSE	FALSE
SYN3	ENSG00000185666	0.631469	8.73023e-05	FALSE	FALSE	FALSE
POU3F1	ENSG00000185668	0.689281	0.000159492	FALSE	FALSE	FALSE
C11orf87	ENSG00000185742	1.43884	3.35863e-07	FALSE	FALSE	FALSE
ZNF829	ENSG00000185869	0.318099	0.00249836	FALSE	FALSE	FALSE
PRSS38	ENSG00000185888	1.52141	1.23504e-05	FALSE	FALSE	FALSE
GRK1	ENSG00000185974	0.641204	0.00932402	FALSE	FALSE	FALSE
SLC36A2	ENSG00000186335	1.13849	9.84114e-05	FALSE	FALSE	FALSE
LINC00643	ENSG00000186369	0.98157	0.000193801	FALSE	FALSE	FALSE
INSIG1	ENSG00000186480	-0.294474	0.00396678	FALSE	FALSE	FALSE
MYT1L	ENSG00000186487	1.51199	1.86482e-08	FALSE	FALSE	FALSE
CYP4F3	ENSG00000186529	-0.75259	0.00158052	FALSE	FALSE	FALSE
MAGEE2	ENSG00000186675	0.898009	0.000184111	FALSE	FALSE	FALSE
CCDC73	ENSG00000186714	0.601958	8.90048e-09	FALSE	FALSE	FALSE
SELENOV	ENSG00000186838	0.922463	0.00674491	FALSE	FALSE	FALSE
PDZD7	ENSG00000186862	0.379886	0.00223821	FALSE	FALSE	FALSE
SLIT1	ENSG00000187122	0.918801	0.0051067	FALSE	FALSE	FALSE
VSTM2B	ENSG00000187135	1.37714	0.00218955	FALSE	FALSE	FALSE
NPSR1	ENSG00000187258	1.03319	0.000420461	FALSE	FALSE	FALSE
FAM9C	ENSG00000187268	0.900294	0.000331708	FALSE	TRUE	FALSE
DCC	ENSG00000187323	0.903607	7.20587e-05	FALSE	FALSE	FALSE
CHP1	ENSG00000187446	-0.175629	0.00473074	FALSE	FALSE	FALSE
CDHR4	ENSG00000187492	0.657787	0.00356498	FALSE	FALSE	FALSE
ERC2	ENSG00000187672	0.864703	1.55102e-07	FALSE	FALSE	FALSE
CXorf67	ENSG00000187690	3.03988	1.8517e-30	FALSE	FALSE	FALSE
LIN28B	ENSG00000187772	1.81036	0.000121759	FALSE	FALSE	FALSE
P2RX2	ENSG00000187848	0.881572	0.00185387	FALSE	FALSE	TRUE
SHISA7	ENSG00000187902	0.749195	4.57154e-06	FALSE	FALSE	FALSE
DMBT1	ENSG00000187908	-1.05554	0.000682045	FALSE	FALSE	FALSE
OR7D2	ENSG00000188000	0.77225	0.00261998	FALSE	FALSE	FALSE
PLA2G4E	ENSG00000188089	1.10148	1.63086e-06	FALSE	FALSE	FALSE
OTOG	ENSG00000188162	0.83133	0.00127993	FALSE	FALSE	FALSE
SBK1	ENSG00000188322	0.446662	0.000953251	FALSE	FALSE	FALSE
PRR19	ENSG00000188368	0.37452	0.000544055	FALSE	FALSE	FALSE
SERPINA5	ENSG00000188488	0.756212	0.00101603	FALSE	FALSE	FALSE
KRTDAP	ENSG00000188508	0.917044	0.00170625	FALSE	FALSE	FALSE
HBA2	ENSG00000188536	-0.616311	0.00402673	FALSE	FALSE	FALSE
HILS1	ENSG00000188662	0.78789	0.00158052	FALSE	FALSE	FALSE
ZDHHC9	ENSG00000188706	-0.194021	0.00724158	FALSE	FALSE	FALSE
FSIP2	ENSG00000188738	0.723467	5.98405e-06	FALSE	FALSE	FALSE
SKOR1	ENSG00000188779	0.351814	0.00535163	FALSE	FALSE	FALSE
UTS2B	ENSG00000188958	0.922918	4.00107e-11	FALSE	FALSE	FALSE
NA	ENSG00000188987	0.462776	0.00702171	FALSE	FALSE	FALSE
ZNF573	ENSG00000189144	0.231374	0.00951987	FALSE	FALSE	FALSE
	ENSG00000189229	0.986061	0.00312101	FALSE	FALSE	FALSE
LINC00943	ENSG00000189238	0.603155	0.00361539	FALSE	FALSE	FALSE
USP32P3	ENSG00000189423	0.442612	0.00958257	FALSE	FALSE	FALSE
SPOCK3	ENSG00000196104	0.977476	0.000505459	FALSE	FALSE	FALSE
SULT1C3	ENSG00000196228	1.14982	0.00961645	FALSE	FALSE	FALSE
STK31	ENSG00000196335	0.696153	3.02091e-06	FALSE	FALSE	FALSE
ADH7	ENSG00000196344	-1.02212	0.00768273	FALSE	FALSE	FALSE
ZKSCAN7	ENSG00000196345	0.270529	0.00858255	FALSE	FALSE	FALSE
ELAVL3	ENSG00000196361	0.984713	1.66987e-05	FALSE	FALSE	FALSE
ZNF781	ENSG00000196381	0.556259	2.06666e-06	FALSE	FALSE	FALSE
ZNF124	ENSG00000196418	0.224621	0.00741865	FALSE	FALSE	FALSE
ZNF569	ENSG00000196437	0.279803	0.000959155	FALSE	FALSE	FALSE
SLC30A10	ENSG00000196660	0.833713	0.00107908	FALSE	FALSE	FALSE
S100A2	ENSG00000196754	1.01584	9.10809e-08	FALSE	FALSE	FALSE
KPNA5	ENSG00000196911	0.195657	0.00818355	FALSE	FALSE	FALSE
ZNF585A	ENSG00000196967	0.306814	1.00566e-05	FALSE	FALSE	FALSE
ZNF420	ENSG00000197050	0.229458	0.00245847	FALSE	FALSE	FALSE
ZMYM1	ENSG00000197056	0.165693	0.0032992	FALSE	FALSE	FALSE
PIWIL2	ENSG00000197181	0.595389	0.000233946	FALSE	TRUE	FALSE
	ENSG00000197301	0.566349	0.00472933	FALSE	FALSE	FALSE
OPALIN	ENSG00000197430	1.80734	4.78673e-08	FALSE	FALSE	FALSE
MYH6	ENSG00000197616	1.38514	7.84397e-07	FALSE	FALSE	FALSE
SERPINB13	ENSG00000197641	1.14768	0.00277581	FALSE	FALSE	FALSE
ZNF780A	ENSG00000197782	0.237392	0.00146982	FALSE	FALSE	FALSE
SLC22A12	ENSG00000197891	1.33273	0.000273455	FALSE	FALSE	FALSE
SLC22A6	ENSG00000197901	1.45198	1.98915e-05	FALSE	FALSE	FALSE
CCDC151	ENSG00000198003	0.474725	0.00191211	FALSE	FALSE	FALSE
TUBA3C	ENSG00000198033	2.24289	1.46727e-07	FALSE	FALSE	FALSE
DSCR8	ENSG00000198054	1.54631	0.00129101	FALSE	FALSE	FALSE
ZNF248	ENSG00000198105	0.219509	0.00193027	FALSE	FALSE	FALSE
ZNF607	ENSG00000198182	0.30812	0.000958933	FALSE	FALSE	FALSE
CACNA1E	ENSG00000198216	0.819013	8.75242e-05	FALSE	FALSE	FALSE
DCAF12L2	ENSG00000198354	0.796188	0.00345049	FALSE	FALSE	FALSE
B3GNT6	ENSG00000198488	-0.929557	0.00216639	FALSE	FALSE	FALSE
C2CD4A	ENSG00000198535	-1.09195	1.24296e-06	FALSE	FALSE	FALSE
WDHD1	ENSG00000198554	0.230495	0.00235838	FALSE	FALSE	FALSE
	ENSG00000198555	0.871419	0.00193852	FALSE	FALSE	FALSE
RYR2	ENSG00000198626	0.611638	0.00336935	FALSE	FALSE	FALSE
FAM3D	ENSG00000198643	-0.911689	9.18667e-05	FALSE	FALSE	FALSE
FAM19A2	ENSG00000198673	0.41455	0.000122223	FALSE	FALSE	FALSE
MUC2	ENSG00000198788	0.982716	0.00852253	FALSE	FALSE	FALSE
GRM3	ENSG00000198822	1.02247	9.68563e-06	FALSE	FALSE	FALSE
HSD3BP5	ENSG00000198857	0.651807	6.49042e-05	FALSE	FALSE	FALSE
PNMA5	ENSG00000198883	2.19465	1.00507e-16	FALSE	FALSE	FALSE
RORB	ENSG00000198963	-0.708627	0.00146074	FALSE	FALSE	FALSE
MIR429	ENSG00000198976	-0.535435	0.00594732	FALSE	FALSE	FALSE
RNU5B-1	ENSG00000200156	1.07253	0.00361539	FALSE	FALSE	FALSE
RN7SKP255	ENSG00000200312	1.13242	0.00305169	FALSE	FALSE	FALSE
SNORA74A	ENSG00000200959	1.05998	0.000365912	FALSE	FALSE	FALSE
RNY1	ENSG00000201098	0.832979	0.00772755	FALSE	FALSE	FALSE
RN7SKP80	ENSG00000202058	0.532474	2.25439e-05	FALSE	FALSE	FALSE
RNA5SP283	ENSG00000202474	0.464235	0.000645749	FALSE	FALSE	FALSE
	ENSG00000203392	0.368548	0.00925722	FALSE	FALSE	FALSE
CAPN8	ENSG00000203697	-0.680389	0.00193027	FALSE	FALSE	TRUE
NA	ENSG00000203849	0.723435	0.0044558	FALSE	FALSE	FALSE
EFCAB7	ENSG00000203965	0.166948	0.00536529	FALSE	FALSE	FALSE
LCN8	ENSG00000204001	0.951516	0.00476139	FALSE	FALSE	FALSE
TCEAL6	ENSG00000204071	0.692559	0.00224488	FALSE	FALSE	FALSE
COL11A2	ENSG00000204248	0.647083	0.000564874	FALSE	FALSE	FALSE
TMEM235	ENSG00000204278	0.818375	0.00852253	FALSE	FALSE	FALSE
BTNL2	ENSG00000204290	0.854988	1.66987e-05	FALSE	FALSE	FALSE
SDHD	ENSG00000204370	-0.180513	0.00462318	FALSE	FALSE	FALSE
NA	ENSG00000204466	1.11126	1.93986e-05	FALSE	FALSE	FALSE
PSORS1C2	ENSG00000204538	1.28843	4.75345e-08	FALSE	FALSE	FALSE
MUC21	ENSG00000204544	-0.988948	0.00720116	FALSE	FALSE	FALSE
LINC01257	ENSG00000204603	1.2399	0.00103577	FALSE	FALSE	FALSE
DISP3	ENSG00000204624	0.657282	0.000798106	FALSE	FALSE	FALSE
MOG	ENSG00000204655	1.1224	0.000722479	FALSE	FALSE	FALSE
TTC25	ENSG00000204815	0.35025	0.00433473	FALSE	FALSE	FALSE
PCDHA1	ENSG00000204970	0.731257	0.00341215	FALSE	FALSE	FALSE
LGALS7	ENSG00000205076	1.05318	0.00510122	FALSE	FALSE	TRUE
LINC00654	ENSG00000205181	0.373294	0.00352329	FALSE	FALSE	FALSE
	ENSG00000205325	1.16101	0.00307198	FALSE	FALSE	FALSE
TP53TG3D	ENSG00000205456	0.85375	0.00103032	FALSE	FALSE	FALSE
CCDC85C	ENSG00000205476	0.268958	0.00571619	FALSE	FALSE	FALSE
MUC19	ENSG00000205592	1.02679	0.000197235	FALSE	FALSE	FALSE
	ENSG00000205622	0.682524	0.00174906	FALSE	FALSE	FALSE
MFSD2B	ENSG00000205639	0.473644	6.24091e-05	FALSE	FALSE	FALSE
	ENSG00000206129	0.924091	0.000399655	FALSE	FALSE	FALSE
NA	ENSG00000206176	0.619574	0.000107548	FALSE	FALSE	FALSE
DUXAP8	ENSG00000206195	0.616723	0.000523459	FALSE	FALSE	FALSE
XKR4	ENSG00000206579	0.796966	0.000711379	FALSE	FALSE	FALSE
SNORA49	ENSG00000208892	0.825758	0.00695747	FALSE	FALSE	FALSE
MT-TP	ENSG00000210196	-0.375991	0.00123622	FALSE	FALSE	FALSE
DIO2	ENSG00000211448	-0.739063	9.84114e-05	FALSE	FALSE	FALSE
IGKV3D-11	ENSG00000211632	0.853803	0.00188291	FALSE	FALSE	FALSE
IGLV10-54	ENSG00000211642	1.44496	3.34712e-07	FALSE	FALSE	FALSE
IGHV5-78	ENSG00000211978	0.548206	0.00644732	FALSE	FALSE	FALSE
SNORD17	ENSG00000212232	0.776476	1.00566e-05	FALSE	FALSE	FALSE
SNORA74B	ENSG00000212402	0.95305	0.000131661	FALSE	FALSE	FALSE
NA	ENSG00000212670	0.23494	0.00327427	FALSE	FALSE	FALSE
RPL31P11	ENSG00000213075	0.556974	0.000134452	FALSE	FALSE	FALSE
MLLT11	ENSG00000213190	0.305011	0.00913082	FALSE	FALSE	FALSE
	ENSG00000213303	0.353988	0.00382697	FALSE	FALSE	FALSE
GPC2	ENSG00000213420	0.637431	1.18092e-06	FALSE	FALSE	FALSE
SERBP1P1	ENSG00000213740	0.443462	1.98464e-05	FALSE	FALSE	FALSE
HBE1	ENSG00000213931	2.47472	7.30901e-19	FALSE	FALSE	FALSE
ZNF99	ENSG00000213973	1.01404	4.29942e-05	FALSE	FALSE	FALSE
ZNF788	ENSG00000214189	0.321992	0.00630521	FALSE	FALSE	FALSE
SLC6A10P	ENSG00000214617	1.35753	1.98915e-05	FALSE	FALSE	FALSE
LRRC69	ENSG00000214954	0.331126	0.0019786	FALSE	FALSE	FALSE
GSG1L2	ENSG00000214978	1.7745	0.00123172	FALSE	FALSE	FALSE
COL28A1	ENSG00000215018	0.801677	2.9938e-06	FALSE	FALSE	FALSE
	ENSG00000215022	0.288025	0.00355488	FALSE	FALSE	FALSE
	ENSG00000215146	0.516298	0.0051067	FALSE	FALSE	FALSE
	ENSG00000215156	0.707141	1.68001e-06	FALSE	FALSE	FALSE
	ENSG00000215158	0.300275	0.00298982	FALSE	FALSE	FALSE
LINC00680	ENSG00000215190	0.212759	0.00722485	FALSE	FALSE	FALSE
	ENSG00000215270	0.460694	0.00939007	FALSE	FALSE	FALSE
NA	ENSG00000215394	0.549325	0.00718015	FALSE	FALSE	FALSE
SCRT2	ENSG00000215397	1.16753	0.0013759	FALSE	FALSE	FALSE
LINC00598	ENSG00000215483	0.494924	0.00250599	FALSE	FALSE	FALSE
NA	ENSG00000215504	0.408306	0.00158052	FALSE	FALSE	FALSE
EFCAB8	ENSG00000215529	0.497403	0.00417814	FALSE	FALSE	FALSE
BCORP1	ENSG00000215580	0.682368	0.00375864	FALSE	FALSE	FALSE
PTGES3P2	ENSG00000217643	0.616349	5.8436e-06	FALSE	FALSE	FALSE
	ENSG00000223812	1.55715	0.000861069	FALSE	FALSE	FALSE
	ENSG00000223991	1.16128	3.45822e-05	FALSE	FALSE	FALSE
EGFR-AS1	ENSG00000224057	1.16395	1.46084e-07	FALSE	FALSE	FALSE
ZNF812P	ENSG00000224689	0.63846	0.00299118	FALSE	FALSE	FALSE
PPP4R3C	ENSG00000224960	1.82017	0.00596035	FALSE	FALSE	FALSE
	ENSG00000225554	1.06586	0.00422078	FALSE	FALSE	FALSE
	ENSG00000225868	0.607945	0.0044442	FALSE	FALSE	FALSE
HCG23	ENSG00000225914	0.493645	0.0051067	FALSE	FALSE	FALSE
SATB2-AS1	ENSG00000225953	0.525294	0.00341215	FALSE	FALSE	FALSE
CROCC2	ENSG00000226321	1.3114	1.14624e-10	FALSE	FALSE	FALSE
C12orf77	ENSG00000226397	0.881757	0.00402762	FALSE	FALSE	FALSE
MRPL23-AS1	ENSG00000226416	0.647776	0.000536707	FALSE	FALSE	FALSE
SLC25A5P5	ENSG00000226421	0.586945	0.000386378	FALSE	FALSE	FALSE
	ENSG00000226539	1.31752	1.11058e-08	FALSE	FALSE	FALSE
	ENSG00000226647	0.433802	0.00899819	FALSE	FALSE	FALSE
PLCG1-AS1	ENSG00000226648	0.32431	0.00411419	FALSE	FALSE	FALSE
TEX41	ENSG00000226674	1.00107	2.55612e-10	FALSE	FALSE	FALSE
LINC01535	ENSG00000226686	0.428898	0.00915055	FALSE	FALSE	FALSE
	ENSG00000226812	1.08168	0.000268285	FALSE	FALSE	FALSE
LHFPL3-AS1	ENSG00000226869	0.987156	0.00103577	FALSE	FALSE	FALSE
CEP164P1	ENSG00000226937	0.397235	0.0053771	FALSE	FALSE	FALSE
	ENSG00000227082	0.628124	5.86319e-05	FALSE	FALSE	FALSE
WDR11-AS1	ENSG00000227165	0.444498	0.00938314	FALSE	FALSE	FALSE
MIR663AHG	ENSG00000227195	0.823976	0.00472933	FALSE	FALSE	FALSE
PCGEM1	ENSG00000227418	2.48593	3.75198e-07	FALSE	FALSE	FALSE
SOX21-AS1	ENSG00000227640	-0.911629	0.000760652	FALSE	FALSE	FALSE
	ENSG00000227745	0.980344	0.00601665	FALSE	FALSE	FALSE
TRIM60P18	ENSG00000227986	0.258993	0.00905544	FALSE	FALSE	FALSE
LINC02048	ENSG00000228271	0.752195	0.00357277	FALSE	FALSE	FALSE
ORM2	ENSG00000228278	0.801851	0.00115146	FALSE	FALSE	FALSE
NA	ENSG00000228389	0.423396	0.00219613	FALSE	FALSE	FALSE
	ENSG00000228444	0.32633	0.00778691	FALSE	FALSE	FALSE
	ENSG00000228549	0.767195	0.000253252	FALSE	FALSE	FALSE
	ENSG00000228626	0.988192	0.00413049	FALSE	FALSE	FALSE
	ENSG00000228665	0.502083	0.00010032	FALSE	FALSE	FALSE
MIR4500HG	ENSG00000228824	1.93322	3.38949e-12	FALSE	FALSE	FALSE
	ENSG00000228835	0.759545	0.000509306	FALSE	FALSE	FALSE
UBAC2-AS1	ENSG00000228889	0.253378	0.00768203	FALSE	FALSE	FALSE
SATB1-AS1	ENSG00000228956	0.478931	0.00525336	FALSE	FALSE	FALSE
SPRR2C	ENSG00000229035	1.83149	0.0034381	FALSE	FALSE	FALSE
MEOX2-AS1	ENSG00000229108	0.924118	0.00209616	FALSE	FALSE	FALSE
	ENSG00000229191	1.02999	1.37754e-09	FALSE	FALSE	FALSE
LINC00377	ENSG00000229246	1.12797	2.5765e-06	FALSE	FALSE	FALSE
HYI-AS1	ENSG00000229348	0.341635	0.00422381	FALSE	FALSE	FALSE
SPINK8	ENSG00000229453	-0.985313	0.00495943	FALSE	FALSE	FALSE
LINC01789	ENSG00000229457	1.79991	1.93579e-05	FALSE	FALSE	FALSE
	ENSG00000229728	0.294016	0.0044442	FALSE	FALSE	FALSE
EMX2OS	ENSG00000229847	0.585707	0.00376108	FALSE	FALSE	FALSE
	ENSG00000229852	0.378694	0.000166404	FALSE	FALSE	FALSE
PGA3	ENSG00000229859	1.8339	7.54674e-08	FALSE	FALSE	FALSE
	ENSG00000229941	0.959941	0.00630521	FALSE	FALSE	FALSE
MIR181A1HG	ENSG00000229989	0.980494	2.78063e-07	FALSE	FALSE	FALSE
	ENSG00000230084	0.341874	0.00361539	FALSE	FALSE	FALSE
HERC2P4	ENSG00000230267	0.784974	0.000517848	FALSE	FALSE	FALSE
	ENSG00000231057	0.564582	0.00183315	FALSE	FALSE	FALSE
NA	ENSG00000231196	0.738238	0.0032992	FALSE	FALSE	FALSE
	ENSG00000231252	1.14214	9.68563e-06	FALSE	FALSE	FALSE
LINC01816	ENSG00000231327	0.35217	0.00355488	FALSE	FALSE	FALSE
FILNC1	ENSG00000231426	0.89586	0.0027735	FALSE	FALSE	FALSE
LINC01249	ENSG00000231532	1.96032	2.39795e-05	FALSE	FALSE	FALSE
	ENSG00000231703	0.673187	0.000973603	FALSE	FALSE	FALSE
FAM238B	ENSG00000231976	1.29579	2.95631e-05	FALSE	FALSE	FALSE
ASCL5	ENSG00000232237	0.893954	7.32654e-08	FALSE	FALSE	FALSE
	ENSG00000232527	0.580824	1.96682e-06	FALSE	FALSE	FALSE
KIZ-AS1	ENSG00000232712	0.373912	0.005554	FALSE	FALSE	FALSE
	ENSG00000232774	-0.51993	0.000799272	FALSE	FALSE	FALSE
SLCO4A1-AS1	ENSG00000232803	-0.812018	0.000273455	FALSE	FALSE	FALSE
ERVH48-1	ENSG00000233056	1.32694	5.26625e-16	FALSE	FALSE	FALSE
	ENSG00000233491	1.97256	2.04641e-08	FALSE	FALSE	FALSE
MYCNOS	ENSG00000233718	0.604819	0.00687868	FALSE	FALSE	FALSE
LINC01122	ENSG00000233723	0.806112	0.000136325	FALSE	FALSE	FALSE
	ENSG00000233757	0.366096	0.00425924	FALSE	FALSE	FALSE
	ENSG00000233974	0.732049	5.37194e-05	FALSE	FALSE	FALSE
NA	ENSG00000233991	0.645818	3.29943e-05	FALSE	FALSE	FALSE
	ENSG00000234028	0.235784	0.00664927	FALSE	FALSE	FALSE
PAGE2	ENSG00000234068	1.78221	7.04298e-06	FALSE	FALSE	FALSE
	ENSG00000234147	0.76039	0.000517848	FALSE	FALSE	FALSE
LINC01114	ENSG00000234177	0.930686	0.000640239	FALSE	FALSE	FALSE
	ENSG00000234352	1.1212	0.000642706	FALSE	FALSE	FALSE
RNF219-AS1	ENSG00000234377	0.568483	8.75242e-05	FALSE	FALSE	FALSE
CCDC188	ENSG00000234409	0.488063	0.000222402	FALSE	FALSE	FALSE
SDCBP2-AS1	ENSG00000234684	0.20117	0.0095565	FALSE	FALSE	FALSE
LINC01287	ENSG00000234722	1.05911	0.000233863	FALSE	FALSE	FALSE
	ENSG00000234750	0.383551	0.00231956	FALSE	FALSE	FALSE
LINC01239	ENSG00000234840	0.729111	0.000435333	FALSE	FALSE	FALSE
EIF3EP1	ENSG00000234882	0.327641	0.000772167	FALSE	FALSE	FALSE
SHISA8	ENSG00000234965	0.924345	0.000878182	FALSE	FALSE	FALSE
	ENSG00000235139	1.53792	0.00209616	FALSE	FALSE	FALSE
LINC01102	ENSG00000235597	1.08727	4.29942e-05	FALSE	FALSE	FALSE
	ENSG00000236194	0.415322	0.00675153	FALSE	FALSE	FALSE
	ENSG00000236199	-0.284258	0.00203091	FALSE	FALSE	FALSE
KDM4A-AS1	ENSG00000236200	0.234412	0.00935072	FALSE	FALSE	FALSE
CLEC2L	ENSG00000236279	1.30278	6.29119e-07	FALSE	FALSE	FALSE
ZBED5	ENSG00000236287	0.139116	0.00806622	FALSE	FALSE	FALSE
TRHDE-AS1	ENSG00000236333	0.995175	0.000186707	FALSE	FALSE	FALSE
	ENSG00000236449	0.936636	4.06428e-06	FALSE	FALSE	FALSE
NPAP1P4	ENSG00000236521	0.957574	0.00462213	FALSE	FALSE	FALSE
STARD13-AS	ENSG00000236581	0.740731	2.86657e-06	FALSE	FALSE	FALSE
RPS15AP38	ENSG00000237668	0.32163	0.00635071	FALSE	FALSE	FALSE
NFIA-AS2	ENSG00000237928	0.631652	0.00299053	FALSE	FALSE	FALSE
EIF4HP2	ENSG00000237977	0.348478	0.00506372	FALSE	FALSE	FALSE
	ENSG00000238107	0.916324	0.00049535	FALSE	FALSE	FALSE
NA	ENSG00000238261	0.81904	0.000184111	FALSE	FALSE	FALSE
	ENSG00000238287	0.33687	0.0035528	FALSE	FALSE	FALSE
SNORD108	ENSG00000239014	0.675984	8.24646e-05	FALSE	FALSE	FALSE
	ENSG00000239219	0.558309	0.000414543	FALSE	FALSE	FALSE
	ENSG00000239665	0.223982	0.00417814	FALSE	FALSE	FALSE
NA	ENSG00000239776	0.545126	0.00294394	FALSE	FALSE	FALSE
IGKV1D-8	ENSG00000239819	0.780863	0.00955869	FALSE	FALSE	FALSE
CPHL1P	ENSG00000240216	1.17687	7.69262e-10	FALSE	FALSE	FALSE
	ENSG00000240241	1.8852	0.000505537	FALSE	FALSE	FALSE
	ENSG00000240487	0.688915	0.00442804	FALSE	FALSE	FALSE
CDKN2B-AS1	ENSG00000240498	0.572402	5.50012e-05	FALSE	FALSE	FALSE
RPL7AP10	ENSG00000240522	0.367567	0.00447725	FALSE	FALSE	FALSE
	ENSG00000240695	0.278647	0.00968882	FALSE	FALSE	FALSE
NA	ENSG00000240800	1.87872	0.000451212	FALSE	FALSE	FALSE
	ENSG00000241490	0.543739	0.00698871	FALSE	FALSE	FALSE
ZBTB20-AS1	ENSG00000241560	0.41817	0.0084135	FALSE	FALSE	FALSE
PAQR9-AS1	ENSG00000241570	0.698952	0.00470749	FALSE	FALSE	FALSE
	ENSG00000241666	0.559102	0.00362726	FALSE	FALSE	FALSE
RPSAP52	ENSG00000241749	1.07248	2.59981e-07	FALSE	FALSE	FALSE
	ENSG00000242282	0.282975	0.00062256	FALSE	FALSE	FALSE
NA	ENSG00000242284	1.79958	0.00346747	FALSE	FALSE	FALSE
LINC01206	ENSG00000242512	0.977751	0.00324578	FALSE	FALSE	FALSE
CNTF	ENSG00000242689	0.31342	0.00376017	FALSE	FALSE	FALSE
SOX2-OT	ENSG00000242808	0.552742	0.00112363	FALSE	FALSE	FALSE
ABCC13	ENSG00000243064	0.9161	0.00291695	FALSE	FALSE	FALSE
	ENSG00000243144	0.655952	0.0028171	FALSE	FALSE	FALSE
UPK3B	ENSG00000243566	0.722204	8.14218e-05	FALSE	FALSE	FALSE
	ENSG00000243818	1.11462	0.00603663	FALSE	FALSE	FALSE
TUBA4B	ENSG00000243910	0.675016	0.00140188	FALSE	FALSE	FALSE
SPRR2F	ENSG00000244094	1.54459	0.000233742	FALSE	FALSE	FALSE
LINC01322	ENSG00000244128	1.0211	0.00261184	FALSE	FALSE	FALSE
	ENSG00000244306	0.478432	0.00720084	FALSE	FALSE	FALSE
	ENSG00000244349	0.397617	0.00771501	FALSE	FALSE	FALSE
CFHR1	ENSG00000244414	1.20275	8.1886e-05	FALSE	FALSE	FALSE
UGT1A4	ENSG00000244474	1.16763	0.00191258	FALSE	FALSE	FALSE
ASPRV1	ENSG00000244617	0.557914	5.78943e-06	FALSE	FALSE	FALSE
	ENSG00000244675	0.549445	0.00880059	FALSE	FALSE	FALSE
MTHFD2P1	ENSG00000244681	1.39397	3.94283e-07	FALSE	FALSE	FALSE
HBB	ENSG00000244734	-0.67321	0.00216872	FALSE	FALSE	FALSE
ZNF585B	ENSG00000245680	0.293815	5.67035e-05	FALSE	FALSE	FALSE
FRG1-DT	ENSG00000245685	0.455158	0.000240586	FALSE	FALSE	FALSE
	ENSG00000246731	0.399189	0.00074284	FALSE	FALSE	FALSE
	ENSG00000247134	0.532865	0.00510122	FALSE	FALSE	FALSE
	ENSG00000247416	0.818799	0.0038352	FALSE	FALSE	FALSE
ADH1C	ENSG00000248144	-0.809231	0.00113537	FALSE	FALSE	FALSE
LINC02275	ENSG00000248319	1.06545	0.000342593	FALSE	FALSE	FALSE
POU5F2	ENSG00000248483	0.559323	0.0007546	FALSE	FALSE	FALSE
	ENSG00000248713	1.22455	1.23592e-06	FALSE	FALSE	FALSE
LINC02432	ENSG00000248810	0.817377	0.00136252	FALSE	FALSE	FALSE
HAUS5	ENSG00000249115	0.182339	0.00405149	FALSE	FALSE	FALSE
TMEM132D-AS1	ENSG00000249196	2.79678	3.97014e-09	FALSE	FALSE	FALSE
LINC01411	ENSG00000249306	0.958665	0.00858917	FALSE	FALSE	FALSE
LINC01060	ENSG00000249378	0.741904	0.00770707	FALSE	FALSE	FALSE
NA	ENSG00000249430	0.733006	0.00331563	FALSE	FALSE	FALSE
LINC01234	ENSG00000249550	0.879344	0.00336935	FALSE	FALSE	FALSE
	ENSG00000249572	0.355361	0.00103104	FALSE	FALSE	FALSE
	ENSG00000249631	0.607496	0.00959928	FALSE	FALSE	FALSE
	ENSG00000249790	1.02774	8.75242e-05	FALSE	FALSE	FALSE
	ENSG00000250041	0.550697	0.00541199	FALSE	FALSE	FALSE
LINC02232	ENSG00000250125	1.47487	0.00040785	FALSE	FALSE	FALSE
	ENSG00000250155	0.431782	0.00242848	FALSE	FALSE	FALSE
PURPL	ENSG00000250337	0.840122	0.00955843	FALSE	FALSE	FALSE
NA	ENSG00000250439	0.912505	6.00089e-06	FALSE	FALSE	FALSE
	ENSG00000250564	1.00167	0.00139349	FALSE	FALSE	FALSE
	ENSG00000250616	0.295118	0.0098177	FALSE	FALSE	FALSE
	ENSG00000250771	0.836679	5.59152e-07	FALSE	FALSE	FALSE
	ENSG00000251050	0.461363	0.00274302	FALSE	FALSE	FALSE
	ENSG00000251138	1.08956	0.00168876	FALSE	FALSE	FALSE
NA	ENSG00000251164	1.05193	2.22907e-06	FALSE	FALSE	FALSE
ZNF345	ENSG00000251247	0.254023	0.00192693	FALSE	FALSE	FALSE
	ENSG00000251323	0.532358	8.14218e-05	FALSE	FALSE	FALSE
LINC02241	ENSG00000251629	2.42531	3.45335e-09	FALSE	FALSE	FALSE
SCARNA5	ENSG00000252010	0.803479	0.00105971	FALSE	FALSE	FALSE
LINC00599	ENSG00000253230	1.35908	5.59117e-05	FALSE	FALSE	FALSE
IGLVI-70	ENSG00000253239	1.14311	0.00292383	FALSE	FALSE	FALSE
	ENSG00000253633	0.615082	0.00361452	FALSE	FALSE	FALSE
GASAL1	ENSG00000253669	0.374913	0.000621123	FALSE	FALSE	FALSE
	ENSG00000253706	1.64499	6.55227e-08	FALSE	FALSE	FALSE
IGHGP	ENSG00000253755	0.842243	0.000783463	FALSE	FALSE	FALSE
	ENSG00000253888	1.92272	2.22724e-08	FALSE	FALSE	FALSE
LINC01419	ENSG00000253898	2.44423	2.9938e-06	FALSE	FALSE	FALSE
	ENSG00000253967	1.01632	0.00768203	FALSE	FALSE	FALSE
NPIPB11	ENSG00000254206	0.436182	0.00264871	FALSE	FALSE	FALSE
	ENSG00000254319	0.826426	0.000477019	FALSE	FALSE	FALSE
MIR124-2HG	ENSG00000254377	3.11495	7.76529e-06	FALSE	FALSE	FALSE
BBOX1-AS1	ENSG00000254560	0.688735	0.00342887	FALSE	FALSE	FALSE
	ENSG00000254607	0.956092	0.00349363	FALSE	FALSE	FALSE
RTL1	ENSG00000254656	2.21992	6.6596e-12	FALSE	FALSE	FALSE
MEX3A	ENSG00000254726	0.473485	0.000374446	FALSE	FALSE	FALSE
NA	ENSG00000255318	0.921963	7.59493e-08	FALSE	FALSE	FALSE
	ENSG00000255397	0.464063	1.17499e-05	FALSE	FALSE	FALSE
	ENSG00000255458	0.283359	0.00763519	FALSE	FALSE	FALSE
MIR9-3HG	ENSG00000255571	0.609421	0.0044442	FALSE	FALSE	FALSE
PCDHB17P	ENSG00000255622	0.883179	7.51834e-05	FALSE	FALSE	FALSE
RMST	ENSG00000255794	1.04522	1.00566e-05	FALSE	FALSE	FALSE
	ENSG00000255983	1.47777	3.60359e-05	FALSE	FALSE	FALSE
	ENSG00000256001	0.957915	2.48538e-06	FALSE	FALSE	FALSE
ADGRD1-AS1	ENSG00000256151	1.388	0.000131621	FALSE	FALSE	FALSE
SMLR1	ENSG00000256162	0.684435	0.00386289	FALSE	FALSE	FALSE
	ENSG00000256417	1.43897	2.39795e-05	FALSE	FALSE	FALSE
TAS2R31	ENSG00000256436	0.47288	0.00047566	FALSE	FALSE	FALSE
CYP2B7P	ENSG00000256612	-0.700582	0.00444374	FALSE	FALSE	FALSE
KHDC1L	ENSG00000256980	1.73886	3.38949e-12	FALSE	FALSE	FALSE
LINC02413	ENSG00000257345	1.32623	6.80377e-10	FALSE	FALSE	FALSE
	ENSG00000257501	0.811701	0.00366069	FALSE	FALSE	FALSE
G2E3-AS1	ENSG00000257636	1.13594	0.00105971	FALSE	FALSE	FALSE
	ENSG00000258168	0.876493	3.36432e-05	FALSE	FALSE	FALSE
	ENSG00000258365	0.408193	0.000160624	FALSE	FALSE	FALSE
PPT2-EGFL8	ENSG00000258388	0.249601	0.00163109	FALSE	FALSE	FALSE
CHMP4BP1	ENSG00000258469	-0.421448	0.00602922	FALSE	FALSE	FALSE
LINC00640	ENSG00000258479	0.544429	0.000794753	FALSE	FALSE	FALSE
	ENSG00000258525	0.784903	1.37784e-05	FALSE	FALSE	FALSE
CENPUP2	ENSG00000258546	0.684127	0.00226486	FALSE	FALSE	FALSE
LINC00645	ENSG00000258548	1.63501	5.03352e-07	FALSE	FALSE	FALSE
NBEAP1	ENSG00000258590	0.907418	1.19201e-05	FALSE	FALSE	FALSE
LINC01629	ENSG00000258602	0.92193	0.00510122	FALSE	FALSE	FALSE
	ENSG00000258628	0.720492	0.00111169	FALSE	FALSE	FALSE
LINC02308	ENSG00000258675	1.30781	4.6212e-06	FALSE	FALSE	FALSE
	ENSG00000258711	0.587109	0.00329605	FALSE	FALSE	FALSE
LINC02328	ENSG00000258733	0.37716	0.00404558	FALSE	FALSE	FALSE
	ENSG00000258927	1.34864	0.000111053	FALSE	FALSE	FALSE
	ENSG00000258987	0.594682	0.00995707	FALSE	FALSE	FALSE
	ENSG00000259001	0.648029	0.00492565	FALSE	FALSE	FALSE
LINC00648	ENSG00000259129	2.28411	5.25906e-12	FALSE	FALSE	FALSE
	ENSG00000259153	0.318979	0.00476139	FALSE	FALSE	FALSE
LINC02253	ENSG00000259485	0.921417	0.00773225	FALSE	FALSE	FALSE
LINC00052	ENSG00000259527	2.54856	7.76144e-08	FALSE	FALSE	FALSE
	ENSG00000259705	0.676969	2.06666e-06	FALSE	FALSE	FALSE
NA	ENSG00000259796	0.686219	0.00403521	FALSE	FALSE	FALSE
	ENSG00000259877	0.230862	0.00630687	FALSE	FALSE	FALSE
NA	ENSG00000259901	0.238842	0.00508683	FALSE	FALSE	FALSE
	ENSG00000259943	0.306009	0.000108766	FALSE	FALSE	FALSE
	ENSG00000259959	0.219017	0.0012179	FALSE	FALSE	FALSE
LINC02562	ENSG00000260265	0.887267	0.00548392	FALSE	FALSE	FALSE
	ENSG00000260296	0.395179	0.000426161	FALSE	FALSE	FALSE
	ENSG00000260329	0.288915	0.00555945	FALSE	FALSE	FALSE
	ENSG00000260400	0.315151	0.008455	FALSE	FALSE	FALSE
	ENSG00000260412	1.04069	0.000126302	FALSE	FALSE	FALSE
NBAT1	ENSG00000260455	0.913169	1.79111e-06	FALSE	FALSE	FALSE
	ENSG00000260563	0.277518	0.004679	FALSE	FALSE	FALSE
	ENSG00000260581	0.748214	0.00049535	FALSE	FALSE	FALSE
	ENSG00000260604	1.05597	6.00915e-09	FALSE	FALSE	FALSE
	ENSG00000260664	0.926116	0.00258492	FALSE	FALSE	FALSE
LINC01963	ENSG00000260804	0.258369	0.00573107	FALSE	FALSE	FALSE
	ENSG00000260814	0.228464	0.00495226	FALSE	FALSE	FALSE
	ENSG00000260879	0.294006	0.00538526	FALSE	FALSE	FALSE
	ENSG00000260918	0.721035	0.000896073	FALSE	FALSE	FALSE
	ENSG00000260920	0.274248	0.00312641	FALSE	FALSE	FALSE
LINC00622	ENSG00000260941	0.468339	0.0012449	FALSE	FALSE	FALSE
	ENSG00000261069	0.633944	4.35061e-05	FALSE	FALSE	FALSE
LINC02167	ENSG00000261122	1.76604	1.12353e-05	FALSE	FALSE	FALSE
	ENSG00000261168	0.571294	0.000114138	FALSE	FALSE	FALSE
	ENSG00000261170	0.83398	0.00040785	FALSE	FALSE	FALSE
LINC01238	ENSG00000261186	0.39515	0.00938314	FALSE	FALSE	FALSE
	ENSG00000261188	0.30655	9.31503e-05	FALSE	FALSE	FALSE
	ENSG00000261335	0.434925	0.00015012	FALSE	FALSE	FALSE
	ENSG00000261409	1.10373	0.00880278	FALSE	FALSE	FALSE
	ENSG00000261471	0.542717	0.00231956	FALSE	FALSE	FALSE
NA	ENSG00000261589	0.264358	0.00487733	FALSE	FALSE	FALSE
TPBGL	ENSG00000261594	0.509846	0.00150643	FALSE	FALSE	FALSE
LINC02177	ENSG00000261617	0.681858	0.00373867	FALSE	FALSE	FALSE
GOLGA6L7	ENSG00000261649	0.750794	0.00918632	FALSE	FALSE	FALSE
	ENSG00000261770	0.444263	0.000982179	FALSE	FALSE	FALSE
LINC02582	ENSG00000261780	1.15591	0.00859628	FALSE	FALSE	FALSE
MFSD1P1	ENSG00000261868	0.575356	0.00267637	FALSE	FALSE	FALSE
	ENSG00000261959	0.803216	0.00770707	FALSE	FALSE	FALSE
	ENSG00000262202	0.854501	0.000174384	FALSE	FALSE	FALSE
	ENSG00000262681	0.577991	0.00462318	FALSE	FALSE	FALSE
	ENSG00000262995	1.38414	3.23628e-05	FALSE	FALSE	FALSE
	ENSG00000263089	0.419695	0.00307198	FALSE	FALSE	FALSE
	ENSG00000263412	0.303494	0.00373046	FALSE	FALSE	FALSE
	ENSG00000263731	0.235313	0.00930087	FALSE	FALSE	FALSE
NA	ENSG00000264469	0.204153	0.00582638	FALSE	FALSE	FALSE
SYPL1P2	ENSG00000265683	0.387702	0.00203091	FALSE	FALSE	FALSE
	ENSG00000266601	0.26187	0.00356174	FALSE	FALSE	FALSE
	ENSG00000266910	0.37268	6.27726e-05	FALSE	FALSE	FALSE
ZNF793-AS1	ENSG00000266916	0.534545	6.22094e-05	FALSE	FALSE	FALSE
NA	ENSG00000266930	0.244539	0.00159785	FALSE	FALSE	FALSE
	ENSG00000267009	0.292363	0.00851433	FALSE	FALSE	FALSE
ZNF850	ENSG00000267041	0.386956	4.05271e-05	FALSE	FALSE	FALSE
	ENSG00000267053	0.479539	0.000204568	FALSE	FALSE	FALSE
	ENSG00000267213	0.332574	0.00813827	FALSE	FALSE	FALSE
	ENSG00000267218	0.72001	0.00344909	FALSE	FALSE	FALSE
	ENSG00000267260	0.763688	1.12353e-05	FALSE	FALSE	FALSE
	ENSG00000267284	1.17457	0.000433141	FALSE	FALSE	FALSE
	ENSG00000267309	0.236885	0.00984037	FALSE	FALSE	FALSE
	ENSG00000267327	1.17997	2.73635e-05	FALSE	FALSE	FALSE
	ENSG00000267665	0.746395	0.00332887	FALSE	FALSE	FALSE
MIR4527HG	ENSG00000267761	2.045	6.62879e-09	FALSE	FALSE	FALSE
LINC01801	ENSG00000267767	0.521356	0.002752	FALSE	FALSE	FALSE
	ENSG00000267882	0.446664	0.000420461	FALSE	FALSE	FALSE
	ENSG00000267886	0.675011	0.000730995	FALSE	FALSE	FALSE
	ENSG00000267924	0.815966	0.00140293	FALSE	FALSE	FALSE
NA	ENSG00000268166	0.298605	0.00472933	FALSE	FALSE	FALSE
	ENSG00000268403	0.28628	0.00540909	FALSE	FALSE	FALSE
	ENSG00000268460	0.611571	0.00749135	FALSE	FALSE	FALSE
	ENSG00000268756	0.687551	1.56527e-05	FALSE	FALSE	FALSE
ZNF728	ENSG00000269067	0.776852	0.00268389	FALSE	FALSE	FALSE
	ENSG00000269069	0.332216	0.00447158	FALSE	FALSE	FALSE
	ENSG00000269243	0.359174	0.00524678	FALSE	FALSE	FALSE
LINC01224	ENSG00000269416	0.822374	0.000187733	FALSE	FALSE	FALSE
KCNQ1OT1	ENSG00000269821	0.488246	7.54548e-05	FALSE	FALSE	FALSE
IPO5P1	ENSG00000269837	0.266503	0.00951987	FALSE	FALSE	FALSE
	ENSG00000269845	0.420048	0.000163904	FALSE	FALSE	FALSE
	ENSG00000269994	1.08072	0.000106488	FALSE	FALSE	FALSE
	ENSG00000270038	1.50014	2.0916e-05	FALSE	FALSE	FALSE
	ENSG00000270066	0.607131	0.00151362	FALSE	FALSE	FALSE
NA	ENSG00000270246	0.544234	0.00252962	FALSE	FALSE	FALSE
SMC2-AS1	ENSG00000270332	0.398583	0.00249728	FALSE	FALSE	FALSE
CAHM	ENSG00000270419	0.343324	0.00123622	FALSE	FALSE	FALSE
	ENSG00000270638	0.358157	0.00360473	FALSE	FALSE	FALSE
TSIX	ENSG00000270641	0.522825	0.00133655	FALSE	FALSE	FALSE
	ENSG00000270704	0.493827	0.0037931	FALSE	FALSE	FALSE
	ENSG00000271259	0.416681	0.00640404	FALSE	FALSE	FALSE
BNIP3P17	ENSG00000271524	0.461243	0.00532126	FALSE	FALSE	FALSE
	ENSG00000271551	0.393989	0.000369647	FALSE	FALSE	FALSE
	ENSG00000271576	0.390294	0.00675153	FALSE	FALSE	FALSE
NA	ENSG00000271722	-0.381226	0.00555945	FALSE	FALSE	FALSE
	ENSG00000271862	0.284775	0.00261998	FALSE	FALSE	FALSE
	ENSG00000272008	0.294851	0.0030863	FALSE	FALSE	FALSE
	ENSG00000272097	0.355979	7.54207e-05	FALSE	FALSE	FALSE
	ENSG00000272108	0.650602	0.000284438	FALSE	FALSE	FALSE
	ENSG00000272154	0.71985	0.00151521	FALSE	FALSE	FALSE
CASC15	ENSG00000272168	0.368552	0.00968882	FALSE	FALSE	FALSE
NA	ENSG00000272216	0.350297	0.00745021	FALSE	FALSE	FALSE
	ENSG00000272301	0.407274	0.00167918	FALSE	FALSE	FALSE
	ENSG00000272356	0.253885	0.00797696	FALSE	FALSE	FALSE
LINC02018	ENSG00000272690	0.334347	0.00775234	FALSE	FALSE	FALSE
	ENSG00000272716	0.294803	0.00961645	FALSE	FALSE	FALSE
	ENSG00000272791	0.379518	0.00211898	FALSE	FALSE	FALSE
	ENSG00000272872	0.674419	0.00049535	FALSE	FALSE	FALSE
	ENSG00000272954	0.442443	0.00638675	FALSE	FALSE	FALSE
	ENSG00000272980	0.375947	0.00362726	FALSE	FALSE	FALSE
	ENSG00000273002	0.349287	0.00368008	FALSE	FALSE	FALSE
	ENSG00000273008	0.252839	0.00852253	FALSE	FALSE	FALSE
	ENSG00000273259	0.632473	0.00525336	FALSE	FALSE	FALSE
ZBTB8B	ENSG00000273274	0.537603	0.00734843	FALSE	FALSE	FALSE
	ENSG00000273432	0.305186	0.00402762	FALSE	FALSE	FALSE
#Differentially expressed genes in cancers expressing PRDM9, including sex as a covariate #Differentiallly expressed genes based on log2(foldchange) > 2 and p-values adjusted to assess the false discovery rate using the Benjamini and Hochberg procedure below a threshold for FDR < 0.01. #Additional columns identify genes overlapping genes in the driver gene list from the Intogen ressource(Gundem e…

## Sheet: Data 1.4
Gene name	Ensembl ID	Drivers	Meiosis GO biological process	Differentially expressed in PRDM9 transfected cells
CYP26B1	ENSG00000003137	FALSE	TRUE	FALSE
RECQL	ENSG00000004700	FALSE	FALSE	FALSE
ARX	ENSG00000004848	FALSE	FALSE	FALSE
ITGA2B	ENSG00000005961	FALSE	FALSE	FALSE
CRLF1	ENSG00000006016	FALSE	FALSE	FALSE
ABCC8	ENSG00000006071	FALSE	FALSE	FALSE
CD79B	ENSG00000007312	FALSE	FALSE	FALSE
PAX6	ENSG00000007372	FALSE	FALSE	FALSE
DPF1	ENSG00000011332	FALSE	FALSE	FALSE
ATP1A2	ENSG00000018625	FALSE	FALSE	FALSE
CYP24A1	ENSG00000019186	FALSE	FALSE	FALSE
NLRP2	ENSG00000022556	FALSE	FALSE	FALSE
BARX2	ENSG00000043039	FALSE	FALSE	FALSE
TPR	ENSG00000047410	FALSE	FALSE	FALSE
SCML1	ENSG00000047634	FALSE	FALSE	FALSE
FOXP3	ENSG00000049768	FALSE	FALSE	FALSE
SYNE2	ENSG00000054654	FALSE	FALSE	FALSE
CAMK2B	ENSG00000058404	FALSE	FALSE	FALSE
DGKG	ENSG00000058866	FALSE	FALSE	FALSE
SEZ6	ENSG00000063015	FALSE	FALSE	FALSE
NGFR	ENSG00000064300	FALSE	FALSE	TRUE
ERBB3	ENSG00000065361	TRUE	FALSE	FALSE
SNAP91	ENSG00000065609	FALSE	FALSE	FALSE
SLC9A3	ENSG00000066230	FALSE	FALSE	FALSE
ASPM	ENSG00000066279	TRUE	TRUE	FALSE
TNFRSF1A	ENSG00000067182	FALSE	FALSE	FALSE
TP53BP1	ENSG00000067369	TRUE	FALSE	FALSE
RORA	ENSG00000069667	FALSE	FALSE	FALSE
CYP2W1	ENSG00000073067	FALSE	FALSE	FALSE
ATP2A3	ENSG00000074370	FALSE	FALSE	FALSE
PAK3	ENSG00000077264	FALSE	FALSE	FALSE
N4BP2	ENSG00000078177	FALSE	FALSE	FALSE
MYH7B	ENSG00000078814	FALSE	FALSE	FALSE
CDH17	ENSG00000079112	FALSE	FALSE	FALSE
OSBPL6	ENSG00000079156	FALSE	FALSE	FALSE
RIF1	ENSG00000080345	FALSE	FALSE	FALSE
CHRNA3	ENSG00000080644	FALSE	FALSE	FALSE
CXCL2	ENSG00000081041	FALSE	FALSE	FALSE
ARG2	ENSG00000081181	FALSE	FALSE	FALSE
CACNA1S	ENSG00000081248	FALSE	FALSE	FALSE
KCNK2	ENSG00000082482	FALSE	FALSE	FALSE
ZNF264	ENSG00000083844	FALSE	FALSE	FALSE
PHACTR3	ENSG00000087495	FALSE	FALSE	FALSE
LTBP4	ENSG00000090006	FALSE	FALSE	FALSE
NA	ENSG00000090920	FALSE	FALSE	FALSE
TF	ENSG00000091513	FALSE	FALSE	FALSE
NLRP1	ENSG00000091592	FALSE	FALSE	FALSE
AGO1	ENSG00000092847	FALSE	FALSE	FALSE
CRTAC1	ENSG00000095713	FALSE	FALSE	FALSE
PGC	ENSG00000096088	FALSE	FALSE	FALSE
EFNA2	ENSG00000099617	FALSE	FALSE	FALSE
IGFALS	ENSG00000099769	FALSE	FALSE	FALSE
CDHR5	ENSG00000099834	FALSE	FALSE	FALSE
SLC7A4	ENSG00000099960	FALSE	FALSE	FALSE
LGALS2	ENSG00000100079	FALSE	FALSE	FALSE
SEZ6L	ENSG00000100095	FALSE	FALSE	FALSE
PCNX1	ENSG00000100731	FALSE	FALSE	FALSE
DHRS2	ENSG00000100867	FALSE	FALSE	FALSE
HNF4A	ENSG00000101076	FALSE	FALSE	FALSE
CEP192	ENSG00000101639	FALSE	FALSE	FALSE
NALCN	ENSG00000102452	FALSE	FALSE	FALSE
TMC5	ENSG00000103534	FALSE	FALSE	FALSE
IQCH	ENSG00000103599	FALSE	FALSE	FALSE
HERC1	ENSG00000103657	FALSE	FALSE	FALSE
IGDCC4	ENSG00000103742	FALSE	FALSE	FALSE
EPHX3	ENSG00000105131	FALSE	FALSE	FALSE
APLP1	ENSG00000105290	FALSE	FALSE	FALSE
CD79A	ENSG00000105369	FALSE	FALSE	FALSE
NKG7	ENSG00000105374	FALSE	FALSE	FALSE
CEACAM5	ENSG00000105388	FALSE	FALSE	FALSE
ATP1A3	ENSG00000105409	FALSE	FALSE	FALSE
SIGLEC6	ENSG00000105492	FALSE	FALSE	FALSE
COMP	ENSG00000105664	FALSE	FALSE	FALSE
TMEM59L	ENSG00000105696	FALSE	FALSE	FALSE
PTPRZ1	ENSG00000106278	FALSE	FALSE	FALSE
SFRP4	ENSG00000106483	FALSE	FALSE	FALSE
MPDZ	ENSG00000107186	FALSE	FALSE	FALSE
SETX	ENSG00000107290	FALSE	FALSE	FALSE
DKK1	ENSG00000107984	FALSE	FALSE	FALSE
SORCS1	ENSG00000108018	FALSE	FALSE	FALSE
CALCA	ENSG00000110680	FALSE	FALSE	FALSE
TSPAN11	ENSG00000110900	FALSE	FALSE	FALSE
BIN2	ENSG00000110934	FALSE	FALSE	FALSE
CUX2	ENSG00000111249	FALSE	FALSE	FALSE
ADTRP	ENSG00000111863	FALSE	FALSE	FALSE
ZNF451	ENSG00000112200	FALSE	FALSE	FALSE
VNN1	ENSG00000112299	FALSE	FALSE	FALSE
B3GAT2	ENSG00000112309	FALSE	FALSE	FALSE
PDE10A	ENSG00000112541	FALSE	FALSE	FALSE
MEP1A	ENSG00000112818	FALSE	FALSE	FALSE
NME5	ENSG00000112981	FALSE	FALSE	FALSE
KNG1	ENSG00000113889	FALSE	FALSE	FALSE
ZAP70	ENSG00000115085	FALSE	FALSE	FALSE
SLC30A3	ENSG00000115194	FALSE	FALSE	FALSE
APC2	ENSG00000115266	FALSE	FALSE	FALSE
USP34	ENSG00000115464	FALSE	FALSE	FALSE
ALMS1	ENSG00000116127	FALSE	FALSE	FALSE
ASH1L	ENSG00000116539	TRUE	FALSE	FALSE
PLA2G2D	ENSG00000117215	FALSE	FALSE	FALSE
CCDC181	ENSG00000117477	FALSE	FALSE	FALSE
SLC19A2	ENSG00000117479	FALSE	FALSE	FALSE
PROX1	ENSG00000117707	FALSE	FALSE	FALSE
STAG1	ENSG00000118007	TRUE	FALSE	FALSE
A4GNT	ENSG00000118017	FALSE	FALSE	FALSE
CNR1	ENSG00000118432	FALSE	FALSE	FALSE
RARRES1	ENSG00000118849	FALSE	FALSE	FALSE
DNAH7	ENSG00000118997	FALSE	FALSE	FALSE
MLH3	ENSG00000119684	TRUE	TRUE	FALSE
EPCAM	ENSG00000119888	FALSE	FALSE	FALSE
INSL6	ENSG00000120210	FALSE	FALSE	FALSE
TNFSF10	ENSG00000121858	FALSE	FALSE	FALSE
EGR2	ENSG00000122877	FALSE	FALSE	FALSE
ITPR2	ENSG00000123104	FALSE	FALSE	FALSE
HOXC11	ENSG00000123388	FALSE	FALSE	FALSE
DBH	ENSG00000123454	FALSE	FALSE	FALSE
IL13RA2	ENSG00000123496	FALSE	FALSE	FALSE
BAZ2B	ENSG00000123636	TRUE	FALSE	FALSE
BMP4	ENSG00000125378	FALSE	FALSE	FALSE
S1PR4	ENSG00000125910	FALSE	FALSE	FALSE
CITED1	ENSG00000125931	FALSE	FALSE	FALSE
HCST	ENSG00000126264	FALSE	FALSE	FALSE
MACF1	ENSG00000127603	TRUE	FALSE	FALSE
ZNF780B	ENSG00000128000	FALSE	FALSE	FALSE
ZFP36	ENSG00000128016	FALSE	FALSE	FALSE
RASL11B	ENSG00000128045	FALSE	FALSE	FALSE
RAC2	ENSG00000128340	FALSE	FALSE	FALSE
TMOD2	ENSG00000128872	FALSE	FALSE	FALSE
KCNC1	ENSG00000129159	FALSE	FALSE	FALSE
TPH1	ENSG00000129167	FALSE	FALSE	FALSE
KLK10	ENSG00000129451	FALSE	FALSE	FALSE
OLFM1	ENSG00000130558	FALSE	FALSE	FALSE
CALY	ENSG00000130643	FALSE	FALSE	FALSE
MNX1	ENSG00000130675	FALSE	FALSE	FALSE
ZNF236	ENSG00000130856	FALSE	FALSE	FALSE
GFPT2	ENSG00000131459	FALSE	FALSE	FALSE
NR0B2	ENSG00000131910	FALSE	FALSE	FALSE
FAAP24	ENSG00000131944	FALSE	FALSE	FALSE
FCRLA	ENSG00000132185	FALSE	FALSE	FALSE
VPS13B	ENSG00000132549	FALSE	FALSE	FALSE
BCAN	ENSG00000132692	FALSE	FALSE	FALSE
ADAMDEC1	ENSG00000134028	FALSE	FALSE	FALSE
HMGCS2	ENSG00000134240	FALSE	FALSE	FALSE
WNT2B	ENSG00000134245	FALSE	FALSE	FALSE
CRB1	ENSG00000134376	FALSE	FALSE	FALSE
ERN2	ENSG00000134398	FALSE	FALSE	FALSE
SOX3	ENSG00000134595	FALSE	FALSE	FALSE
CD36	ENSG00000135218	FALSE	FALSE	FALSE
CEP350	ENSG00000135837	FALSE	FALSE	FALSE
USP37	ENSG00000135913	FALSE	FALSE	FALSE
REV1	ENSG00000135945	FALSE	FALSE	FALSE
NACAD	ENSG00000136274	FALSE	FALSE	FALSE
NKX2-1	ENSG00000136352	FALSE	FALSE	FALSE
CDK5RAP2	ENSG00000136861	FALSE	FALSE	FALSE
IGFBPL1	ENSG00000137142	FALSE	FALSE	FALSE
IER3	ENSG00000137331	FALSE	FALSE	FALSE
TMPRSS4	ENSG00000137648	FALSE	FALSE	FALSE
MMP7	ENSG00000137673	FALSE	FALSE	FALSE
FXYD2	ENSG00000137731	FALSE	FALSE	FALSE
BMPR1B	ENSG00000138696	FALSE	FALSE	FALSE
BMP2K	ENSG00000138756	FALSE	FALSE	FALSE
LGR5	ENSG00000139292	FALSE	FALSE	FALSE
SYT16	ENSG00000139973	FALSE	FALSE	FALSE
CYP1A2	ENSG00000140505	FALSE	FALSE	FALSE
RPL3L	ENSG00000140986	FALSE	FALSE	FALSE
SLC13A5	ENSG00000141485	FALSE	FALSE	FALSE
RNF157	ENSG00000141576	FALSE	FALSE	FALSE
IGLON5	ENSG00000142549	FALSE	FALSE	FALSE
MYOM3	ENSG00000142661	FALSE	FALSE	FALSE
HORMAD1	ENSG00000143452	FALSE	TRUE	FALSE
LYST	ENSG00000143669	FALSE	FALSE	FALSE
CEP170	ENSG00000143702	FALSE	FALSE	FALSE
IGSF11	ENSG00000144847	FALSE	FALSE	FALSE
KLHL8	ENSG00000145332	FALSE	FALSE	FALSE
SPATA5	ENSG00000145375	FALSE	FALSE	FALSE
CDH18	ENSG00000145526	FALSE	FALSE	FALSE
CRHBP	ENSG00000145708	FALSE	FALSE	FALSE
LIX1	ENSG00000145721	FALSE	FALSE	FALSE
LRRTM2	ENSG00000146006	FALSE	FALSE	FALSE
SCUBE3	ENSG00000146197	FALSE	FALSE	FALSE
RSPO3	ENSG00000146374	FALSE	FALSE	FALSE
PNLDC1	ENSG00000146453	FALSE	FALSE	FALSE
IL2RG	ENSG00000147168	FALSE	FALSE	FALSE
DOK2	ENSG00000147443	FALSE	FALSE	FALSE
LCN2	ENSG00000148346	FALSE	FALSE	FALSE
SCGB1A1	ENSG00000149021	FALSE	FALSE	FALSE
SYT8	ENSG00000149043	FALSE	FALSE	FALSE
NCAM1	ENSG00000149294	FALSE	FALSE	FALSE
ATM	ENSG00000149311	TRUE	TRUE	FALSE
SLX4IP	ENSG00000149346	FALSE	FALSE	FALSE
PLCH2	ENSG00000149527	FALSE	FALSE	FALSE
HMGA2	ENSG00000149948	FALSE	FALSE	FALSE
GPM6A	ENSG00000150625	FALSE	FALSE	FALSE
CNDP1	ENSG00000150656	FALSE	FALSE	FALSE
NPAS3	ENSG00000151322	FALSE	FALSE	FALSE
FER	ENSG00000151422	FALSE	FALSE	FALSE
ITIH2	ENSG00000151655	FALSE	FALSE	FALSE
NBAS	ENSG00000151779	FALSE	FALSE	FALSE
SACS	ENSG00000151835	FALSE	FALSE	FALSE
RAB3C	ENSG00000152932	FALSE	FALSE	FALSE
SCN3A	ENSG00000153253	FALSE	FALSE	FALSE
C16orf74	ENSG00000154102	FALSE	FALSE	FALSE
CCDC144B	ENSG00000154874	FALSE	FALSE	FALSE
CCDC144CP	ENSG00000154898	FALSE	FALSE	FALSE
2018-09-14	ENSG00000154997	FALSE	FALSE	FALSE
NA	ENSG00000155640	FALSE	FALSE	FALSE
NAT2	ENSG00000156006	FALSE	FALSE	FALSE
MAGEA8	ENSG00000156009	FALSE	FALSE	FALSE
CXCL13	ENSG00000156234	FALSE	FALSE	FALSE
SST	ENSG00000157005	FALSE	FALSE	FALSE
CLEC18C	ENSG00000157335	FALSE	FALSE	FALSE
DPYSL5	ENSG00000157851	FALSE	FALSE	FALSE
PKD1L1	ENSG00000158683	FALSE	FALSE	FALSE
CLIC6	ENSG00000159212	FALSE	FALSE	FALSE
CLDN14	ENSG00000159261	FALSE	FALSE	FALSE
SIM2	ENSG00000159263	FALSE	FALSE	FALSE
PTH1R	ENSG00000160801	FALSE	FALSE	FALSE
CYP3A4	ENSG00000160868	FALSE	FALSE	FALSE
FGF19	ENSG00000162344	FALSE	FALSE	FALSE
B3GALT2	ENSG00000162630	FALSE	FALSE	FALSE
ELF3	ENSG00000163435	TRUE	FALSE	FALSE
NEK10	ENSG00000163491	FALSE	FALSE	FALSE
CCDC141	ENSG00000163492	FALSE	FALSE	FALSE
FABP1	ENSG00000163586	FALSE	FALSE	FALSE
CXCL3	ENSG00000163734	FALSE	FALSE	FALSE
CXCL1	ENSG00000163739	FALSE	FALSE	FALSE
PLB1	ENSG00000163803	FALSE	FALSE	FALSE
ZC3H12A	ENSG00000163874	FALSE	FALSE	FALSE
CAMK2N2	ENSG00000163888	FALSE	FALSE	FALSE
INTU	ENSG00000164066	FALSE	FALSE	FALSE
CAMKV	ENSG00000164076	FALSE	FALSE	FALSE
SPINK1	ENSG00000164266	FALSE	FALSE	FALSE
GJB7	ENSG00000164411	FALSE	FALSE	FALSE
SLC30A8	ENSG00000164756	FALSE	FALSE	FALSE
TMEM67	ENSG00000164953	FALSE	FALSE	FALSE
CPA6	ENSG00000165078	FALSE	FALSE	FALSE
CFAP47	ENSG00000165164	FALSE	FALSE	FALSE
C9orf84	ENSG00000165181	FALSE	FALSE	FALSE
SLC16A9	ENSG00000165449	FALSE	FALSE	FALSE
HEPACAM	ENSG00000165478	FALSE	FALSE	FALSE
OTOGL	ENSG00000165899	FALSE	FALSE	FALSE
TMEM100	ENSG00000166292	FALSE	FALSE	FALSE
DCHS1	ENSG00000166341	FALSE	FALSE	FALSE
ZNF91	ENSG00000167232	FALSE	FALSE	FALSE
	ENSG00000167355	FALSE	FALSE	FALSE
CORO6	ENSG00000167549	FALSE	FALSE	FALSE
KLK4	ENSG00000167749	FALSE	FALSE	FALSE
MGAT5B	ENSG00000167889	FALSE	FALSE	FALSE
PCMTD1	ENSG00000168300	FALSE	FALSE	FALSE
SCGB1D1	ENSG00000168515	FALSE	FALSE	FALSE
ZNF507	ENSG00000168813	FALSE	FALSE	FALSE
MN1	ENSG00000169184	FALSE	FALSE	FALSE
CD52	ENSG00000169442	FALSE	FALSE	FALSE
MUC3A	ENSG00000169894	FALSE	FALSE	FALSE
ZFPM2	ENSG00000169946	FALSE	FALSE	FALSE
MYO7B	ENSG00000169994	FALSE	FALSE	FALSE
CST1	ENSG00000170373	FALSE	FALSE	FALSE
METTL7B	ENSG00000170439	FALSE	FALSE	FALSE
GTSF1	ENSG00000170627	FALSE	FALSE	FALSE
HTRA3	ENSG00000170801	FALSE	FALSE	FALSE
JUNB	ENSG00000171223	FALSE	FALSE	FALSE
KRT13	ENSG00000171401	FALSE	FALSE	FALSE
KRT20	ENSG00000171431	FALSE	FALSE	FALSE
COL24A1	ENSG00000171502	FALSE	FALSE	FALSE
LGALS4	ENSG00000171747	FALSE	FALSE	FALSE
KNDC1	ENSG00000171798	FALSE	FALSE	FALSE
ZNF540	ENSG00000171817	FALSE	FALSE	FALSE
ANGPTL7	ENSG00000171819	FALSE	FALSE	FALSE
ZNF570	ENSG00000171827	FALSE	FALSE	FALSE
GAP43	ENSG00000172020	FALSE	FALSE	FALSE
CCL19	ENSG00000172724	FALSE	FALSE	FALSE
COL6A5	ENSG00000172752	FALSE	FALSE	FALSE
CES4A	ENSG00000172824	FALSE	FALSE	FALSE
MRGPRF	ENSG00000172935	FALSE	FALSE	FALSE
BNC2	ENSG00000173068	TRUE	FALSE	FALSE
GOLGB1	ENSG00000173230	FALSE	FALSE	FALSE
TDRD12	ENSG00000173809	FALSE	TRUE	FALSE
MGA	ENSG00000174197	TRUE	FALSE	FALSE
SLC16A11	ENSG00000174326	FALSE	FALSE	FALSE
RALGAPA1	ENSG00000174373	FALSE	FALSE	FALSE
BRSK2	ENSG00000174672	FALSE	FALSE	FALSE
ATR	ENSG00000175054	TRUE	FALSE	FALSE
DES	ENSG00000175084	FALSE	FALSE	FALSE
SPSB4	ENSG00000175093	FALSE	FALSE	FALSE
CADM2	ENSG00000175161	FALSE	FALSE	FALSE
PPM1E	ENSG00000175175	FALSE	FALSE	FALSE
CCNE2	ENSG00000175305	FALSE	TRUE	FALSE
LRRTM4	ENSG00000176204	FALSE	FALSE	FALSE
	ENSG00000177359	FALSE	FALSE	FALSE
CALML3	ENSG00000178363	FALSE	FALSE	FALSE
KLHL11	ENSG00000178502	FALSE	FALSE	FALSE
CTXN1	ENSG00000178531	FALSE	FALSE	FALSE
RFLNA	ENSG00000178882	FALSE	FALSE	FALSE
DPY19L3	ENSG00000178904	FALSE	FALSE	FALSE
TMEM151A	ENSG00000179292	FALSE	FALSE	FALSE
EGR3	ENSG00000179388	FALSE	FALSE	FALSE
APOBEC3B	ENSG00000179750	FALSE	FALSE	FALSE
TMEM150B	ENSG00000180061	FALSE	FALSE	FALSE
NRIP1	ENSG00000180530	FALSE	FALSE	FALSE
SSTR2	ENSG00000180616	FALSE	FALSE	FALSE
SAGE1	ENSG00000181433	FALSE	FALSE	FALSE
FDCSP	ENSG00000181617	FALSE	FALSE	FALSE
ADGRB1	ENSG00000181790	FALSE	FALSE	FALSE
ZNF716	ENSG00000182111	FALSE	FALSE	FALSE
ERCC6L2	ENSG00000182150	FALSE	FALSE	FALSE
CACNB4	ENSG00000182389	FALSE	FALSE	FALSE
NDN	ENSG00000182636	FALSE	FALSE	FALSE
TCEAL7	ENSG00000182916	FALSE	FALSE	FALSE
BEGAIN	ENSG00000183092	FALSE	FALSE	FALSE
WT1-AS	ENSG00000183242	FALSE	FALSE	FALSE
CABCOCO1	ENSG00000183346	FALSE	FALSE	FALSE
PCBP3	ENSG00000183570	FALSE	FALSE	FALSE
NPIPA5	ENSG00000183793	FALSE	FALSE	FALSE
FAM162B	ENSG00000183807	FALSE	FALSE	FALSE
LRRC55	ENSG00000183908	FALSE	FALSE	FALSE
TBX1	ENSG00000184058	FALSE	FALSE	FALSE
NA	ENSG00000184348	FALSE	FALSE	FALSE
NELL2	ENSG00000184613	FALSE	FALSE	FALSE
MAFF	ENSG00000185022	FALSE	FALSE	FALSE
NOTUM	ENSG00000185269	FALSE	FALSE	FALSE
SMYD3	ENSG00000185420	FALSE	FALSE	FALSE
NR2F2	ENSG00000185551	TRUE	FALSE	FALSE
DNAH14	ENSG00000185842	FALSE	FALSE	FALSE
POMK	ENSG00000185900	FALSE	FALSE	FALSE
CCDC73	ENSG00000186714	FALSE	FALSE	FALSE
VSIG10L	ENSG00000186806	FALSE	FALSE	FALSE
CXCR3	ENSG00000186810	FALSE	FALSE	FALSE
SELENOV	ENSG00000186838	FALSE	FALSE	FALSE
ZNF546	ENSG00000187187	FALSE	FALSE	FALSE
ERC2	ENSG00000187672	FALSE	FALSE	FALSE
PRSS45	ENSG00000188086	FALSE	FALSE	FALSE
PLA2G2A	ENSG00000188257	FALSE	FALSE	FALSE
C22orf34	ENSG00000188511	FALSE	FALSE	FALSE
S100A16	ENSG00000188643	FALSE	FALSE	FALSE
VWC2	ENSG00000188730	FALSE	FALSE	FALSE
CALHM6	ENSG00000188820	FALSE	FALSE	FALSE
ZNF292	ENSG00000188994	TRUE	FALSE	FALSE
ZNF573	ENSG00000189144	FALSE	FALSE	FALSE
ALKAL2	ENSG00000189292	FALSE	FALSE	FALSE
MYBPC1	ENSG00000196091	FALSE	FALSE	FALSE
SERPINA3	ENSG00000196136	FALSE	FALSE	FALSE
STK31	ENSG00000196335	FALSE	FALSE	FALSE
CD55	ENSG00000196352	FALSE	FALSE	FALSE
SRGAP2B	ENSG00000196369	FALSE	FALSE	FALSE
ZNF782	ENSG00000196597	FALSE	FALSE	FALSE
POTEF	ENSG00000196604	FALSE	FALSE	FALSE
MMP1	ENSG00000196611	FALSE	FALSE	FALSE
ADH1B	ENSG00000196616	FALSE	FALSE	FALSE
	ENSG00000197301	FALSE	FALSE	FALSE
LYPD2	ENSG00000197353	FALSE	FALSE	FALSE
ZNF675	ENSG00000197372	FALSE	FALSE	FALSE
	ENSG00000197476	FALSE	FALSE	FALSE
KCNMB2	ENSG00000197584	FALSE	FALSE	FALSE
HIST4H4	ENSG00000197837	FALSE	FALSE	FALSE
UGT2B17	ENSG00000197888	FALSE	FALSE	FALSE
ELOVL2	ENSG00000197977	FALSE	FALSE	FALSE
TUBA3C	ENSG00000198033	FALSE	FALSE	FALSE
AVPR1B	ENSG00000198049	FALSE	FALSE	FALSE
C2CD4A	ENSG00000198535	FALSE	FALSE	FALSE
RD3	ENSG00000198570	FALSE	FALSE	FALSE
TAT	ENSG00000198650	FALSE	FALSE	FALSE
MUC2	ENSG00000198788	FALSE	FALSE	FALSE
TOX	ENSG00000198846	FALSE	FALSE	FALSE
PNMA5	ENSG00000198883	FALSE	FALSE	FALSE
SNORA74A	ENSG00000200959	FALSE	FALSE	FALSE
MIR29B2CHG	ENSG00000203709	FALSE	FALSE	FALSE
	ENSG00000203900	FALSE	FALSE	FALSE
LCN8	ENSG00000204001	FALSE	FALSE	FALSE
COL15A1	ENSG00000204291	FALSE	FALSE	FALSE
HSPA1B	ENSG00000204388	FALSE	FALSE	FALSE
NA	ENSG00000204466	FALSE	FALSE	FALSE
ZNF805	ENSG00000204524	FALSE	FALSE	FALSE
TRIM31	ENSG00000204616	FALSE	FALSE	FALSE
NAT8B	ENSG00000204872	FALSE	FALSE	FALSE
ZBTB10	ENSG00000205189	FALSE	FALSE	FALSE
MT1M	ENSG00000205364	FALSE	FALSE	FALSE
EGFEM1P	ENSG00000206120	FALSE	FALSE	FALSE
SNORA80B	ENSG00000206633	FALSE	FALSE	FALSE
IGKC	ENSG00000211592	FALSE	FALSE	FALSE
NA	ENSG00000211630	FALSE	FALSE	FALSE
IGLV4-69	ENSG00000211637	FALSE	FALSE	FALSE
IGLV6-57	ENSG00000211640	FALSE	FALSE	FALSE
IGLV1-51	ENSG00000211644	FALSE	FALSE	FALSE
IGLV1-47	ENSG00000211648	FALSE	FALSE	FALSE
IGLV7-46	ENSG00000211649	FALSE	FALSE	FALSE
IGLV7-43	ENSG00000211652	FALSE	FALSE	FALSE
IGLV3-19	ENSG00000211663	FALSE	FALSE	FALSE
IGLV2-18	ENSG00000211664	FALSE	FALSE	FALSE
IGLV3-9	ENSG00000211670	FALSE	FALSE	FALSE
IGLV3-1	ENSG00000211673	FALSE	FALSE	FALSE
IGHG2	ENSG00000211893	FALSE	FALSE	FALSE
IGHA1	ENSG00000211895	FALSE	FALSE	FALSE
IGHD	ENSG00000211898	FALSE	FALSE	FALSE
IGHM	ENSG00000211899	FALSE	FALSE	FALSE
IGHV6-1	ENSG00000211933	FALSE	FALSE	FALSE
IGHV1-3	ENSG00000211935	FALSE	FALSE	FALSE
IGHV2-5	ENSG00000211937	FALSE	FALSE	FALSE
IGHV3-11	ENSG00000211941	FALSE	FALSE	FALSE
NA	ENSG00000211953	FALSE	FALSE	FALSE
IGHV4-34	ENSG00000211956	FALSE	FALSE	FALSE
IGHV3-49	ENSG00000211965	FALSE	FALSE	FALSE
IGHV3-53	ENSG00000211967	FALSE	FALSE	FALSE
IGHV3-66	ENSG00000211972	FALSE	FALSE	FALSE
SNORA26	ENSG00000212588	FALSE	FALSE	FALSE
LPAL2	ENSG00000213071	FALSE	FALSE	FALSE
NOC2LP1	ENSG00000213225	FALSE	FALSE	FALSE
HBE1	ENSG00000213931	FALSE	FALSE	FALSE
ZNF407	ENSG00000215421	FALSE	FALSE	FALSE
LINC01139	ENSG00000215808	FALSE	FALSE	FALSE
FAM19A5	ENSG00000219438	FALSE	FALSE	FALSE
ACTBP8	ENSG00000220267	FALSE	FALSE	FALSE
SNORA2C	ENSG00000221491	FALSE	FALSE	FALSE
RNU6ATAC	ENSG00000221676	FALSE	FALSE	FALSE
NPTXR	ENSG00000221890	FALSE	FALSE	FALSE
NA	ENSG00000222040	FALSE	FALSE	FALSE
IGHV3-64	ENSG00000223648	FALSE	FALSE	FALSE
IGHV3-74	ENSG00000224650	FALSE	FALSE	FALSE
PRRT4	ENSG00000224940	FALSE	FALSE	FALSE
CROCC2	ENSG00000226321	FALSE	FALSE	FALSE
	ENSG00000226816	FALSE	FALSE	FALSE
ERVMER34-1	ENSG00000226887	FALSE	FALSE	FALSE
LTA	ENSG00000226979	FALSE	FALSE	FALSE
LTB	ENSG00000227507	FALSE	FALSE	FALSE
	ENSG00000227591	FALSE	FALSE	FALSE
NA	ENSG00000228214	FALSE	FALSE	FALSE
	ENSG00000228496	FALSE	FALSE	FALSE
	ENSG00000228626	FALSE	FALSE	FALSE
LINC00659	ENSG00000228705	FALSE	FALSE	FALSE
NA	ENSG00000229841	FALSE	FALSE	FALSE
LRRC37A15P	ENSG00000230069	FALSE	FALSE	FALSE
FTX	ENSG00000230590	FALSE	FALSE	FALSE
	ENSG00000231731	FALSE	FALSE	FALSE
PIK3CD-AS2	ENSG00000231789	FALSE	FALSE	FALSE
	ENSG00000232111	FALSE	FALSE	FALSE
ASCL5	ENSG00000232237	FALSE	FALSE	FALSE
TNF	ENSG00000232810	FALSE	FALSE	FALSE
	ENSG00000233251	FALSE	FALSE	FALSE
	ENSG00000233392	FALSE	FALSE	FALSE
	ENSG00000233757	FALSE	FALSE	FALSE
HIST1H2BN	ENSG00000233822	FALSE	FALSE	FALSE
	ENSG00000233836	FALSE	FALSE	FALSE
PAGE2	ENSG00000234068	FALSE	FALSE	FALSE
LINC02532	ENSG00000235142	FALSE	FALSE	FALSE
GSN-AS1	ENSG00000235865	FALSE	FALSE	FALSE
	ENSG00000236526	FALSE	FALSE	FALSE
	ENSG00000236947	FALSE	FALSE	FALSE
TUSC8	ENSG00000237361	FALSE	FALSE	FALSE
PAGE2B	ENSG00000238269	FALSE	FALSE	FALSE
	ENSG00000239407	FALSE	FALSE	FALSE
IGKV1D-8	ENSG00000239819	FALSE	FALSE	FALSE
SUGT1P3	ENSG00000239827	FALSE	FALSE	FALSE
IGKV1-6	ENSG00000239855	FALSE	FALSE	FALSE
CPHL1P	ENSG00000240216	FALSE	FALSE	FALSE
KRBOX1	ENSG00000240747	FALSE	FALSE	FALSE
TMEM189	ENSG00000240849	FALSE	FALSE	FALSE
IGKV3-11	ENSG00000241351	FALSE	FALSE	FALSE
SNHG3	ENSG00000242125	FALSE	FALSE	FALSE
LINC00996	ENSG00000242258	FALSE	FALSE	FALSE
NA	ENSG00000242284	FALSE	FALSE	FALSE
	ENSG00000242588	FALSE	FALSE	FALSE
IGKV1D-17	ENSG00000242766	FALSE	FALSE	FALSE
IGKV2-30	ENSG00000243238	FALSE	FALSE	FALSE
IGKV1-5	ENSG00000243466	FALSE	FALSE	FALSE
UPK3B	ENSG00000243566	FALSE	FALSE	FALSE
LINC02086	ENSG00000244649	FALSE	FALSE	FALSE
KCTD21-AS1	ENSG00000246174	FALSE	FALSE	FALSE
	ENSG00000247134	FALSE	FALSE	FALSE
LINC02432	ENSG00000248810	FALSE	FALSE	FALSE
KRT8P46	ENSG00000248971	FALSE	FALSE	FALSE
LINC01088	ENSG00000249307	FALSE	FALSE	FALSE
FER1L5	ENSG00000249715	FALSE	FALSE	FALSE
KIAA1210	ENSG00000250423	FALSE	FALSE	FALSE
LINC02384	ENSG00000251301	FALSE	FALSE	FALSE
LINC00958	ENSG00000251381	FALSE	FALSE	FALSE
	ENSG00000251675	FALSE	FALSE	FALSE
	ENSG00000253125	FALSE	FALSE	FALSE
	ENSG00000253284	FALSE	FALSE	FALSE
LINC01419	ENSG00000253898	FALSE	FALSE	FALSE
	ENSG00000254162	FALSE	FALSE	FALSE
PCDHGB1	ENSG00000254221	FALSE	FALSE	FALSE
BBOX1-AS1	ENSG00000254560	FALSE	FALSE	FALSE
NA	ENSG00000255318	FALSE	FALSE	FALSE
ZNF486	ENSG00000256229	FALSE	FALSE	FALSE
ZBED6	ENSG00000257315	FALSE	FALSE	FALSE
IGHV4OR15-8	ENSG00000259261	FALSE	FALSE	FALSE
	ENSG00000259834	FALSE	FALSE	FALSE
NA	ENSG00000260248	FALSE	FALSE	FALSE
	ENSG00000260461	FALSE	FALSE	FALSE
WFDC21P	ENSG00000261040	FALSE	FALSE	FALSE
LINC02167	ENSG00000261122	FALSE	FALSE	FALSE
	ENSG00000261188	FALSE	FALSE	FALSE
	ENSG00000261512	FALSE	FALSE	FALSE
	ENSG00000261553	FALSE	FALSE	FALSE
NA	ENSG00000261589	FALSE	FALSE	FALSE
NA	ENSG00000261685	FALSE	FALSE	FALSE
MIA	ENSG00000261857	FALSE	FALSE	FALSE
LINC00621	ENSG00000262619	FALSE	FALSE	FALSE
	ENSG00000263680	FALSE	FALSE	FALSE
ZNF793-AS1	ENSG00000266916	FALSE	FALSE	FALSE
TRABD2B	ENSG00000269113	FALSE	FALSE	FALSE
KCNQ1OT1	ENSG00000269821	FALSE	FALSE	FALSE
	ENSG00000270066	FALSE	FALSE	FALSE
	ENSG00000270103	FALSE	FALSE	FALSE
MTRNR2L2	ENSG00000271043	FALSE	FALSE	FALSE
IGHV1OR15-3	ENSG00000271288	FALSE	FALSE	FALSE
	ENSG00000271533	FALSE	FALSE	FALSE
	ENSG00000272918	FALSE	FALSE	FALSE
	ENSG00000273100	FALSE	FALSE	FALSE
#Differentially expressed genes in cancers expressing PRDM9 including sex as a covariate, when each cancer type was analysed separately, in two or more cancer types
#Differentiallly expressed genes based on log2(foldchange) > 2 and p-values adjusted to assess the false discovery rate using the Benjamini and Hochberg procedure below a threshold for FDR < 0.01.
#Additional columns identify genes overlapping genes in the driver gene list from the Intogen ressource(Gundem et al.2010), in the meiosis biological process GO term (GO:0051321), and in differentially expressed genes in PRDM9 transfected cells (Altemose et al. 2017).
