# Supplementary material for: Aberrant PRDM9 expression impacts the pan-cancer genomic landscape
Source: HighWire-hosted journal article supplement (doi:10.1101/gr.231696.117), 2018-10-19
Supplement: Supplemental_Data_2.xlsx [file Supplemental_Data_2.xlsx]

## Sheet: Data 2
Chr	Start	End	Closest gene
1	188605127	188609968	RP11-669M2.2
1	194944438	194949424	AL357932.1
1	75383523	75387503	RP11-93N20.1
10	42437204	42444708	KSR1P1
11	39218495	39222280	RP11-313M3.1
11	40703210	40706713	LRRC4C
11	42396413	42403088	CTD-2572N17.1
12	38020328	38026021	RP11-125N22.2
13	56252973	56255922	HNF4GP1
13	63020676	63024150	SQSTM1P1
14	19264640	19268876	CR383657.1
14	86135655	86140505	FLRT2
15	87999660	88004354	RNU6-185P
18	37754069	37758975	RPL17P45
18	63150382	63153937	RP11-453M23.1
18	69845577	69849789	RP11-736G13.1
2	4065239	4069147	RN7SL531P
2	78768287	78770659	AC092660.1
2	81852743	81856467	AC013262.1
2	83438027	83442378	AC138623.1
2	89867502	89869774	IGKV2D-40
3	103518327	103522029	TUBBP11
3	163792937	163796247	RP11-208P4.1
3	90449462	90453855	RP11-557B13.1
4	131840967	131844362	RP11-401I19.1
4	134634354	134637940	RP11-285A15.1
5	11779744	11783979	CTNND2
5	19870632	19874494	CDH18
5	20083543	20086819	RP11-61K20.1
5	24227325	24231203	C5orf17
5	24349767	24353800	CTD-2074D8.1
5	24817845	24821110	SNORD29
5	24852561	24856027	RP11-730N24.1
5	25848836	25852818	MSNP1
5	28123525	28127367	RP11-560A7.1
5	29117954	29121731	RP11-42L13.3
5	29687019	29689772	UBL5P1
5	30296578	30299833	RP11-136H13.1
5	30728968	30733274	RPL19P11
6	103528318	103531758	RP1-76C18.1
6	61971153	61975945	RP1-91N13.1
7	10643589	10648137	AC004535.2
7	145538561	145541120	AC006007.1
7	147249891	147253535	CNTNAP2
7	62643634	62646286	snoU2_19
8	107078654	107083661	RP11-152P17.2
8	112507568	112511002	RP11-1101K5.1
8	139062619	139066300	RP11-489O18.1
X	142213596	142217592	NA
#SNV clusters significantly associated with PRDM9 expression, with their closest gene
